# Supplementary material for: First total synthesis of trehalose containing tetrasaccharides from Mycobacterium smegmatis
Source: Royal Society of Chemistry journal article supplement (doi:10.1039/c6ob00412a), 2016-01-01

## Supporting Information

# First Total Synthesis of Trehalose Containing Tetrasaccharides from *Mycobacterium smegmatis*<sup>†</sup>

Manishkumar A. Chaube,<sup>‡</sup> Vikram A. Sarpe,<sup>‡</sup> Santanu Jana and Suvarn S. Kulkarni\*

*Department of Chemistry, Indian Institute of Technology Bombay, Mumbai 400076, India.*

Email: [suvarn@chem.iitb.ac.in](mailto:suvarn@chem.iitb.ac.in)

### Table of Contents

#### I. Experimental procedures

|                                 |     |
|---------------------------------|-----|
| General methods                 | S3  |
| Synthesis of compound <b>9</b>  | S4  |
| Synthesis of compound <b>5</b>  | S4  |
| Synthesis of compound <b>11</b> | S4  |
| Synthesis of compound <b>1</b>  | S5  |
| Synthesis of compound <b>7</b>  | S6  |
| Synthesis of compound <b>6</b>  | S7  |
| Synthesis of compound <b>13</b> | S8  |
| Synthesis of compound <b>14</b> | S9  |
| Synthesis of compound <b>2</b>  | S10 |
| Synthesis of compound <b>8</b>  | S11 |
| Synthesis of compound <b>15</b> | S12 |
| Synthesis of compound <b>16</b> | S13 |
| Synthesis of compound <b>3</b>  | S14 |

#### II. Spectra

|                                                                       |     |
|-----------------------------------------------------------------------|-----|
| <sup>1</sup> H NMR spectrum of compound <b>9</b>                      | S16 |
| <sup>13</sup> C NMR spectrum of compound <b>9</b>                     | S17 |
| <sup>1</sup> H NMR spectrum of compound <b>5</b>                      | S18 |
| <sup>13</sup> C NMR spectrum of compound <b>5</b>                     | S19 |
| <sup>1</sup> H- <sup>1</sup> H COSY NMR spectrum of compound <b>5</b> | S20 |
| <sup>1</sup> H NMR spectrum of compound <b>11</b>                     | S21 |
| <sup>13</sup> C NMR spectrum of compound <b>11</b>                    | S22 |

|                                                                                         |     |
|-----------------------------------------------------------------------------------------|-----|
| $^1\text{H}$ - $^{13}\text{C}$ HSQC NMR spectrum of compound <b>11</b>                  | S23 |
| $^1\text{H}$ NMR spectrum of compound <b>1</b>                                          | S24 |
| $^{13}\text{C}$ NMR spectrum of compound <b>1</b>                                       | S25 |
| $^1\text{H}$ - $^{13}\text{C}$ HSQC NMR spectrum of compound <b>1</b>                   | S26 |
| $^1\text{H}$ NMR spectrum of compound <b>7</b>                                          | S30 |
| $^{13}\text{C}$ NMR spectrum of compound <b>7</b>                                       | S31 |
| $^1\text{H}$ - $^1\text{H}$ COSY NMR spectrum of compound <b>7</b>                      | S32 |
| $^1\text{H}$ NMR spectrum of compound <b>6</b>                                          | S33 |
| $^{13}\text{C}$ NMR spectrum of compound <b>6</b>                                       | S34 |
| $^1\text{H}$ - $^1\text{H}$ COSY NMR spectrum of compound <b>6</b>                      | S35 |
| $^1\text{H}$ - $^{13}\text{C}$ HSQC NMR spectrum of compound <b>6</b>                   | S36 |
| $^1\text{H}$ NMR spectrum of compound <b>13</b>                                         | S37 |
| $^{13}\text{C}$ NMR spectrum of compound <b>13</b>                                      | S38 |
| $^1\text{H}$ NMR spectrum of compound <b>14</b>                                         | S39 |
| $^{13}\text{C}$ NMR spectrum of compound <b>14</b>                                      | S40 |
| $^1\text{H}$ - $^{13}\text{C}$ (partially decoupled) NMR spectrum of compound <b>14</b> | S41 |
| $^1\text{H}$ - $^{13}\text{C}$ HSQC NMR spectrum of compound <b>14</b>                  | S42 |
| $^1\text{H}$ NMR spectrum of compound <b>2</b>                                          | S47 |
| $^{13}\text{C}$ NMR spectrum of compound <b>2</b>                                       | S48 |
| $^1\text{H}$ - $^{13}\text{C}$ HSQC NMR spectrum of compound <b>2</b>                   | S49 |
| $^1\text{H}$ NMR spectrum of compound <b>8</b>                                          | S50 |
| $^{13}\text{C}$ NMR spectrum of compound <b>8</b>                                       | S51 |
| $^1\text{H}$ - $^1\text{H}$ COSY NMR spectrum of compound <b>8</b>                      | S52 |
| $^1\text{H}$ NMR spectrum of compound <b>15</b>                                         | S53 |
| $^{13}\text{C}$ NMR spectrum of compound <b>15</b>                                      | S54 |
| $^1\text{H}$ NMR spectrum of compound <b>16</b>                                         | S58 |
| $^{13}\text{C}$ NMR spectrum of compound <b>16</b>                                      | S59 |
| $^1\text{H}$ - $^1\text{H}$ COSY NMR spectrum of compound <b>16</b>                     | S60 |
| $^1\text{H}$ - $^{13}\text{C}$ HSQC NMR spectrum of compound <b>16</b>                  | S61 |
| $^1\text{H}$ - $^{13}\text{C}$ (partially decoupled) NMR spectrum of compound <b>16</b> | S62 |
| $^1\text{H}$ NMR spectrum of compound <b>3</b>                                          | S65 |
| $^{13}\text{C}$ NMR spectrum of compound <b>3</b>                                       | S66 |
| $^1\text{H}$ - $^{13}\text{C}$ HSQC NMR spectrum of compound <b>3</b>                   | S67 |

## I. Synthetic procedures and characterization data

### Experimental Section

**A. General Methods:** All reactions were conducted under a dry nitrogen atmosphere. Solvents ( $\text{CH}_2\text{Cl}_2$  >99%, THF 99.5%, Acetonitrile 99.8%, DMF 99.5%) were purchased in capped bottles and dried under sodium or  $\text{CaH}_2$ . All other solvents and reagents were used without further purification. All glasswares used were oven dried before use. TLC was performed on pre-coated Aluminium plates of Silica Gel 60 F254 (0.25 mm, E. Merck). Developed TLC plates were visualized under a short-wave UV lamp and by heating plates that were dipped in ammonium molybdate/cerium (IV) sulfate solution. Silica gel column chromatography was performed using Silica Gel (100-200 mesh or 230-400 mesh) and employed a solvent polarity correlated with TLC mobility. NMR experiments were conducted on 400 and 500 MHz instrument using  $\text{CDCl}_3$  (D, 99.8%) or  $\text{D}_2\text{O}$  (D, 99.9%) as solvents. Chemical shifts are relative to the deuterated solvent peaks and are in parts per million (ppm).  $^1\text{H}$ - $^1\text{H}$  COSY was used to confirm proton assignments. Mass spectra were acquired in the ESI mode. Specific rotation experiments were measured at 589 nm (Na) and 25 °C. IR spectra were recorded on an FT-IR spectrometer using CsCl plates.

### Phenyl 2,3,4-tri-*O*-benzoyl-1-thio- $\beta$ -D-glucopyranoside (**9**):

To a solution of phenyl 2,3,4-tri-*O*-benzoyl-6-*O*-(*t*-butyldiphenylsilyl)-1-thio- $\alpha$ -D-glucopyranoside (0.25 g, 0.30 mmol) in THF (2 mL) was added premixed solution of TBAF (1.52 mL, 1.52 mmol) and AcOH (0.17 mL, 3.04 mmol) at rt and the reaction mixture was stirred for 2 h. After complete conversion of starting material, reaction mixture was concentrated on rotary evaporator and purified by column chromatography to afford compound **9** as a white solid (0.16 g, 90%).  $[\alpha]_{\text{D}}^{20} +11.9$  (*c* 0.6,  $\text{CHCl}_3$ ); IR ( $\text{CHCl}_3$ )  $\nu$  3436, 3032, 1732, 1600, 1452, 1316, 1282, 1260, 1217, 1026, 765, 709  $\text{cm}^{-1}$ ;  $^1\text{H}$  NMR (500 MHz,  $\text{CDCl}_3$ )  $\delta$  7.97-7.92 (m, 4H), 7.82-7.80 (m, 2H), 7.55-7.50 (m, 4H), 7.43-7.36 (m, 5H), 7.34-7.32 (m, 3H), 7.28-7.25 (m, 2H), 5.94 (t,  $J = 9.5$  Hz, 1H), 5.51-5.45 (m, 2H), 5.06 (d,  $J = 10.0$  Hz, 1H), 3.88-3.82 (m, 2H), 3.75 (dd,  $J = 12.5, 4.5$  Hz, 1H), 2.52 (bs, 1H, OH);  $^{13}\text{C}$  NMR (125 MHz,  $\text{CDCl}_3$ )  $\delta$  166.1, 165.9, 165.2, 133.9, 133.5, 133.4, 133.3, 131.9, 130.1, 130.0, 129.9, 129.3, 129.3, 128.9, 128.7, 128.6, 128.6, 128.5, 86.4, 79.0, 74.2, 70.7, 69.4, 61.8; HR-ESI-MS ( $m/z$ ): calcd for  $\text{C}_{33}\text{H}_{28}\text{O}_8\text{S}$  [ $\text{M} + \text{Na}$ ] $^+$  607.1397 found, 607.1405.

**Phenyl 6-*O*-(2,3,4,6-tetra-*O*-benzoyl- $\beta$ -D-glucopyranosyl)-(1 $\rightarrow$ 6)-2,3,4-tetra-*O*-benzoyl- $\beta$ -D-glucopyranoside (5):**

33% HBr in AcOH (1.5 mL) was added to 1,2,3,4,6-penta-*O*-benzoyl glucopyranoside (0.45 gm, 0.64 mmol) at rt and stirred for for 1 h. When the starting material was completely disappeared, reaction was diluted with 50 mL CH<sub>2</sub>Cl<sub>2</sub> and washed sequentially with sat. solution of NaHCO<sub>3</sub> (5 mL), brine (5 mL  $\times$  2) and H<sub>2</sub>O (5 mL). Then the organic layer was concentrated on rotary evaporator and co evaporated with toluene (2 ml  $\times$  3) and kept under high vacuum for 1 h.

To the stirred solution of acceptor **9** (0.25 mg, 0.43 mmol), 3Å MS (400 mg) in CH<sub>2</sub>Cl<sub>2</sub> (1.5 mL) at rt was added the solution of the 2,3,4,6-tetra-*O*-benzoyl glucosyl bromide in CH<sub>2</sub>Cl<sub>2</sub> (2.5 mL) and the reaction mixture was stirred for 15 min at rt and then cooled to -40 °C. AgOTf (330 mg, 1.28 mmol) was added to it and reaction was allowed to stir for 1 h. Reaction was quenched by addition of Et<sub>3</sub>N (0.5 mL). Reaction mixture was filtered through Celite and washed with CH<sub>2</sub>Cl<sub>2</sub>. combined organic layer was concentrated and purified by column chromatography (1:19 ethyl acetate: toluene) to obtain compound **5** as a white solid (497 mg, 85%).  $[\alpha]_D^{20} +11.6$  (*c* 1.5, CHCl<sub>3</sub>); IR (CHCl<sub>3</sub>)  $\nu$  30632927, 2853, 1732, 1602, 1452, 1264, 1178, 1069, 1027, 756, 709 cm<sup>-1</sup>; <sup>1</sup>H NMR (400 MHz, CDCl<sub>3</sub>)  $\delta$  8.06–7.74 (m, 14H), 7.57–7.16 (m, 26H), 5.84 (t, *J* = 9.6 Hz, 1H, H-3'), 5.81 (t, *J* = 9.2 Hz, 1H, H-3), 5.61 (t, *J* = 10.0 Hz, 1H, H-4'), 5.50 (dd, *J* = 9.6, 7.6 Hz, 1H, H-2'), 5.36 (t, *J* = 9.6 Hz, 1H, H-2), 5.26 (t, *J* = 10.0 Hz, 1H, H-4), 4.96 (d, *J* = 7.6 Hz, 1H, H-1'), 4.91 (d, *J* = 10.0 Hz, 1H, H-1), 4.60 (dd, *J* = 12.4, 3.2 Hz, 1H, H6a'), 4.40 (dd, *J* = 12.4, 5.3 Hz, 1H, H6b'), 4.06–4.01 (m, 2H, H-5, H-5'), 4.01–3.95 (m, 2H, H-6ab), <sup>13</sup>C NMR (100 MHz, CDCl<sub>3</sub>)  $\delta$  166.3, 165.9, 165.8, 165.5, 165.4, 165.3, 165.2, 133.7, 133.5, 133.4, 133.2, 131.9, 129.9, 129.9, 129.8, 129.7, 129.4, 129.3, 129.0, 128.9, 128.8, 128.68, 128.64, 128.60, 128.6, 128.5, 128.5, 128.4, 101.2, 86.0, 78.7, 74.2, 73.1, 72.4, 72.0, 70.7, 69.8, 69.7, 68.4, 63.0; HR-ESI-MS (*m/z*): calcd for C<sub>67</sub>H<sub>54</sub>O<sub>17</sub>S [M + Na]<sup>+</sup> 1185.2974 found, 1185.2967.

**2,3,4,6-tetra-*O*-benzoyl- $\beta$ -D-glucopyranosyl-(1 $\rightarrow$ 6)-(2,3,4-tetra-*O*-benzoyl- $\beta$ -D-glucopyranosyl)-(1 $\rightarrow$ 6)-(2,3,4,2',3'-penta-*O*-benzyl)-4',6'-*O*-benzylidene- $\alpha,\alpha$ -D-trehalose (11):**

A solution of **5** (150 mg, 0.13 mmol) and compound **4** (95 mg, 0.11 mmol) in CH<sub>2</sub>Cl<sub>2</sub> (2 mL) was stirred on activated 3 Å MS (200 mg) for 30 min. The reaction mixture was cooled (0 °C) and NIS (36 mg, 0.16 mmol) and TMSOTf (4  $\mu$ L, 0.02 mmol) were added. After 30

min, TLC showed that most of the acceptor was consumed. The reaction mixture was diluted with dichloromethane (60 mL), filtered, and the filtrate was washed successively with aqueous sodium thiosulfate (10 mL), water (10 mL), and brine (10 mL). The organic phase was dried over Na<sub>2</sub>SO<sub>4</sub>, concentrated on rotary evaporator and purified by column chromatography to obtain compound **11** (156 mg, 75%). [ $\alpha$ ]<sub>D</sub><sup>20</sup> +13.0 (*c* 1.1, CHCl<sub>3</sub>); IR (CHCl<sub>3</sub>)  $\nu$  3065, 3030, 2931, 2858, 1732, 1602, 1496, 1452, 1369, 1264, 1178, 1093, 1027, 756, 710 cm<sup>-1</sup>; <sup>1</sup>H NMR (400 MHz, CDCl<sub>3</sub>)  $\delta$  8.03–8.01 (m, 2H), 7.94–7.83 (m, 8H), 7.78–7.75 (m, 4H), 7.54–7.44 (m, 5H), 7.42–7.30 (m, 14H), 7.30–7.20 (m, 28H), 7.17 (t, *J* = 8.0 Hz, 2H), 6.96 (dd, *J* = 7.4, 3.9 Hz, 2H), 5.79 (t, *J* = 9.5 Hz, 1H), 5.77 (t, *J* = 9.5 Hz, 1H), 5.53 (s, 1H), 5.53–5.41 (m, 3H), 5.36 (t, *J* = 9.5 Hz, 1H), 5.17 (d, *J* = 3.6 Hz, 1H), 5.09 (d, *J* = 3.5 Hz, 1H), 4.97–4.78 (m, 5H), 4.72–4.54 (m, 6H), 4.39–4.36 (m, 2H), 4.35–4.17 (m, 2H), 4.13–3.90 (m, 9H), 3.66–3.33 (m, 6H); <sup>13</sup>C NMR (100 MHz, CDCl<sub>3</sub>)  $\delta$  166.2, 165.8, 165.4, 165.3, 165.2, 165.0, 139.1, 139.0, 138.6, 138.2, 137.7, 133.6, 133.4, 133.2, 130.0, 129.9, 129.87, 129.7, 129.4, 129.2, 129.0, 128.97, 128.91, 128.6, 128.5, 128.4, 128.36, 128.32, 128.1, 127.99, 127.87, 127.6, 127.5, 126.3, 101.5, 101.3, 100.8, 94.6, 93.9, 82.5, 81.6, 79.4, 79.3, 78.8, 75.5, 75.4, 74.5, 74.1, 73.7, 73.3, 73.0, 72.9, 72.3, 71.9, 71.88, 70.1, 69.9, 69.7, 69.2, 67.5, 63.1, 62.99. HR-ESI-MS (*m/z*): calcd for C<sub>115</sub>H<sub>104</sub>O<sub>28</sub> [M + Na]<sup>+</sup> 1955.6606 found, 1956.6608.

**( $\beta$ -D-Glucopyranosyl)-(1 $\rightarrow$ 6)-( $\beta$ -D-glucopyranosyl)-(1 $\rightarrow$ 6)- $\alpha,\alpha$ -D-trehalose (**1**):**

The solution of **11** (122 mg, 63.08  $\mu$ mol) in methanolic NaOMe (0.2 M, 5 mL) was stirred at rt for 5 h. Reaction was monitored by LRMS and after complete conversion the reaction mixture was neutralized by addition of acidic resin Amberlite IR 120 H+ (1 g). The resin was filtered off, washed with methanol. The combined organic layer was concentrated, dried and used for next step without purification.

The intermediate obtained in the above step was dissolved in a mixture of EtOH: HOAc (4:1, 5 mL) at rt and Pd(OH)<sub>2</sub> (10%, 150 mg) was added to it. The reaction mixture was stirred for 24 h under H<sub>2</sub> atmosphere. After complete conversion as indicated by LRMS, the reaction mixture was filtered through Celite and washed with EtOH. The organic layer was concentrated on rotary evaporator and purified by column chromatography on silica gel (100-200 mesh) with gradient elution (1:9 methanol: CH<sub>2</sub>Cl<sub>2</sub> to 8:2 methanol: CH<sub>2</sub>Cl<sub>2</sub>) to afford ( $\beta$ -D-glucopyranosyl)-(1 $\rightarrow$ 6)-( $\beta$ -D-glucopyranosyl)-(1 $\rightarrow$ 6)- $\alpha,\alpha$ -D-trehalose (**1**) as a white solid (32 mg, 76%). [ $\alpha$ ]<sub>D</sub><sup>20</sup> +20.9 (*c* 0.67, MeOH); <sup>1</sup>H NMR (500 MHz, CD<sub>3</sub>OD)  $\delta$  5.15-5.10

(m, 2H, H1, H1'), 4.43 (d,  $J = 8.0$  Hz, 1H), 4.38 (d,  $J = 8.0$  Hz, 1H), 4.15 (d,  $J = 11.5$  Hz, 1H), 4.10 (d,  $J = 11.5$  Hz, 1H), 4.01–3.99 (m, 1H), 3.88–3.78 (m, 8H), 3.70–3.66 (m, 3H), 3.53–3.48 (m, 5H), 3.47–3.30 (m, 3H), 3.23 (t,  $J = 8.5$  Hz, 2H);  $^{13}\text{C}$  NMR (125 MHz,  $\text{D}_2\text{O}$ )  $\delta$  102.8, 102.6, 93.3, 93.2, 75.9, 75.7, 75.6, 74.9, 73.1, 72.5, 72.5, 72.2, 71.1, 71.1, 69.7, 69.6, 69.4, 69.3, 68.5, 68.3, 60.7, 60.5; HR-ESI-MS ( $m/z$ ): calcd for  $\text{C}_{24}\text{H}_{42}\text{O}_{21}$   $[\text{M} + \text{Na}]^+$  689.2111 found, 689.2090.

Note: Due to low solubility of compound **1** in  $\text{CD}_3\text{OD}$ , the  $^{13}\text{C}$  NMR spectrum was recorded using  $\text{D}_2\text{O}$  as a solvent.

**Phenyl 4-*O*-benzoyl-2,3-di-*O*-benzyl-6-*O*-*tert*butyldiphenylsilyl- $\beta$ -D-thiogalactopyranoside (7):**

Compound **12** (2.5 g, 6.9 mmol) was dissolved in 80% acetic acid (146 mL, aqueous) and refluxed at 80 °C with stirring for 1 h. Progress of the reaction was monitored by TLC. After 1 h, the reaction mixture was cooled to RT. The reaction mixture was taken in a separating funnel in ethyl acetate. The ethyl acetate layer was washed with  $\text{NaHCO}_3$  ( $3 \times 10$  mL) and brine ( $1 \times 10$  mL). The organic layer was dried over  $\text{Na}_2\text{SO}_4$ , filtered and concentrated. Column chromatography of the residue on the silica gel (7:1 ethyl acetate: pet ether) yielded the diol product (2.0 g, 96%).

To a solution of diol (2.0 g, 4.42 mmol) in anhydrous acetonitrile (13 mL), imidazole (0.66 g, 9.72 mmol) was added. The solution was stirred for 5 min at RT and TBDPSCl (1.24 mL, 4.86 mmol) was added dropwise. The reaction mixture was stirred at RT in the presence of nitrogen for 1 h. Progress of the reaction was monitored by TLC. After 1 h, the reaction mixture was taken in a separating funnel in ethyl acetate. The ethyl acetate layer was washed with brine ( $3 \times 10$  mL). The organic layer was dried over  $\text{Na}_2\text{SO}_4$ , filtered and concentrated. Column chromatography of the residue on the silica gel (1:4 ethyl acetate: pet ether) yielded the C6-OTBDPS protected product (2.32 g, 76%):  $[\alpha]_{\text{D}}^{25} +0.1$  ( $c$  1.00,  $\text{CHCl}_3$ ); IR ( $\text{CHCl}_3$ )  $\nu$  3479, 3066, 2931, 1586, 1427, 1112, 743, 701  $\text{cm}^{-1}$ ;  $^1\text{H}$  NMR (500 MHz,  $\text{CDCl}_3$ )  $\delta$  7.70–7.66 (m, 4H, ArH), 7.56–7.54 (m, 2H, ArH), 7.43–7.40 (m, 4H, ArH), 7.37–7.28 (m, 12H, ArH), 7.23–7.21 (m, 3H, ArH), 4.81 (d,  $J = 10.5$  Hz, 1H,  $\text{PhCH}_2$ ), 4.75 (d,  $J = 10.5$  Hz, 1H,  $\text{PhCH}_2$ ), 4.71 (s, 2H,  $\text{PhCH}_2$ ), 4.60 (d,  $J = 10.0$  Hz, 1H, H-1), 4.10 (bs, 1H, H-4), 3.97–3.89 (m, 2H, H-6), 3.77 (t,  $J = 9.2$  Hz, 1H, H-2), 3.53 (dd,  $J = 3.0, 9.0$  Hz, 1H, H-3), 3.44 (t,  $J = 5.5$  Hz, 1H, H-5), 2.67 (bs, 1H, OH), 1.05 (s, 9H, TBDPS);  $^{13}\text{C}$  NMR (125 MHz,  $\text{CDCl}_3$ )  $\delta$  138.4, 137.9, 135.8, 135.7, 134.3, 133.2, 133.1, 131.7, 129.9, 129.0, 128.7, 128.5, 128.4, 128.1, 128.0,

127.96, 127.93, 127.3, 88.0, 82.7, 78.1, 76.9, 75.9, 72.2, 67.1, 63.7, 27.0, 19.34; HR-ESI-MS ( $m/z$ ): calcd for  $C_{42}H_{46}O_5SSi$  [ $M + Na$ ] $^+$  713.2727, found 713.2724.

To a solution of C6-OTBDPS protected product (2.0 g, 2.89 mmol) in anhydrous dichloromethane (20 mL), anhydrous pyridine (1.2 mL, 14.45 mmol) was added. The solution was stirred for 10 min at 0 °C and benzoyl chloride (0.5 mL, 4.34 mmol) was added dropwise at 0 °C with stirring in the presence of nitrogen. The reaction mixture was slowly warmed to RT and kept stirring for 1 h. Progress of the reaction was monitored by TLC. After 1 h, the reaction mixture was taken in a separating funnel in ethyl acetate. The ethyl acetate layer was washed with brine (3 × 10 mL). The organic layer was dried over  $Na_2SO_4$ , filtered and concentrated. Column chromatography of the residue on the silica gel (1:9 ethyl acetate: pet ether) yielded the product **7** (2.18 g, 95%).  $[\alpha]_D^{25} +16.6$  ( $c$  0.97,  $CHCl_3$ ); IR ( $CHCl_3$ )  $\nu$  2931, 2857, 1726, 1473, 1452, 1427, 1271, 1111, 745, 701, 504  $cm^{-1}$ ;  $^1H$  NMR (500 MHz,  $CDCl_3$ )  $\delta$  7.97 (d, 2H,  $J = 7.0$  Hz, OBz), 7.66-7.58 (m, 5H, ArH), 7.52-7.50 (m, 2H, ArH), 7.46-7.24 (m, 19H, ArH), 7.14-7.12 (m, 2H, ArH), 5.96 (d,  $J = 3.0$  Hz, 1H, H-4), 4.90 (d,  $J = 11.0$  Hz, 1H,  $PhCH_2$ ), 4.69 (ABq,  $J = 10.5$  Hz, 2H,  $PhCH_2$ ), 4.63 (d,  $J = 9.5$  Hz, 1H, H-1), 4.56 (d,  $J = 11.0$  Hz, 1H,  $PhCH_2$ ), 3.82 (dd,  $J = 2.0, 6.0$  Hz, 1H, H-3), 3.80-3.72 (m, 3H, H-5, H-6), 3.66 (t,  $J = 9.2$  Hz, 1H, H-2), 1.02 (s, 9H, TBDPS);  $^{13}C$  NMR (125 MHz,  $CDCl_3$ )  $\delta$  165.6, 138.5, 137.7, 135.7, 135.6, 133.1, 132.9, 130.1, 129.9, 129.8, 129.0, 128.5, 128.3, 127.93, 127.90, 127.8, 127.7, 87.2, 81.7, 77.6, 76.6, 75.8, 72.0, 67.0, 61.8, 26.9, 19.2; HR-ESI-MS ( $m/z$ ): calcd for  $C_{49}H_{50}O_6SSi$  [ $M + Na$ ] $^+$  817.2990, found 817.2981.

**[4-*O*-benzoyl-2,3-di-*O*-benzyl-6-*O*-*tert*butyldiphenylsilyl- $\alpha$ -D-galactopyranosyl]-(1 $\rightarrow$ 6)-(2,3,4-tri-*O*-benzyl- $\alpha$ -D-glucopyranosyl)-(1 $\leftrightarrow$ 1)-2,3-di-*O*-benzyl-4,6-*O*-benzylidene- $\alpha$ -D-glucopyranoside (**6**):**

The solution of the galactosyl thioglycoside donor **7** (0.36 g, 0.45 mmol), the trehalose acceptor **4** (0.32 g, 0.36 mmol) and MS 3Å (0.9 g) in  $CH_2Cl_2$ :  $Et_2O$  (18 mL, 4:1) was stirred under nitrogen atmosphere at RT for about 1 h. The flask was cooled to 0 °C and NIS (146 mg, 0.64 mmol) was added followed by the dropwise addition of TfOH (8  $\mu$ L, 0.09 mmol) at 0 °C. The reaction mixture was stirred at 0 °C under nitrogen atmosphere for 1 h. The reaction was quenched by adding  $NEt_3$  (2-3 drops). The reaction mixture was diluted with  $CH_2Cl_2$ , filtered through Celite and transferred to a separating funnel. The organic layer was washed with aq.  $Na_2S_2O_3$  (2 × 4 mL),  $NaHCO_3$ , brine, dried over  $Na_2SO_4$ , filtered and concentrated. Column chromatography of the residue over silica gel (1:3 ethyl acetate: pet

ether) yielded the desired trisaccharide **6** (0.45 g, 78%):  $[\alpha]_D^{25} +44.7$  (*c* 1.5, CHCl<sub>3</sub>); IR (CHCl<sub>3</sub>)  $\nu$  3066, 2932, 2858, 1726, 1602, 1496, 1454, 1428, 1272, 1161, 1027, 754, 698 cm<sup>-1</sup>; <sup>1</sup>H NMR (500 MHz, CDCl<sub>3</sub>)  $\delta$  8.00 (d, *J* = 10.0 Hz, 2H, OBz), 7.63-7.08 (m, 53H, ArH), 5.91 (s, 1H, H-4), 5.54 (s, 1H, PhCH), 5.14 (d, *J* = 3.5 Hz, 1H, H-1), 5.08 (d, *J* = 2.0 Hz, 2H, 2×H-1), 4.94 (Ap. t, *J* = 11.0 Hz, 2H, PhCH<sub>2</sub>), 4.85-4.82 (m, 4H), 4.71-4.54 (m, 8H), 4.25-4.20 (m, 1H), 4.16-4.08 (m, 3H), 4.05-3.97 (m, 3H), 3.84 (dd, *J* = 5.0, 10.0 Hz, 1H), 3.76 (t, *J* = 10.0 Hz, 1H), 3.70-3.60 (m, 5H), 3.54 (dd, *J* = 3.8, 9.5 Hz, 1H), 3.52-3.49 (m, 1H), 3.40 (dd, *J* = 5.0, 10.0 Hz, 1H), 1.00 (s, 9H, TBDPS); <sup>13</sup>C NMR (125 MHz, CDCl<sub>3</sub>)  $\delta$  165.7, 139.1, 139.0, 138.9, 138.8, 138.4, 138.3, 138.2, 137.7, 135.7, 135.6, 133.3, 133.0, 130.5, 130.0, 129.8, 129.7, 129.0, 128.6, 128.5, 128.48, 128.46, 128.40, 128.3, 128.1, 128.08, 128.06, 128.01, 127.89, 127.86, 127.81, 127.77, 127.73, 127.6, 127.58, 127.54, 127.4, 126.3, 101.4, 98.2, 94.6, 94.0, 82.5, 81.8, 79.8, 79.0, 78.7, 75.86, 75.83, 75.6, 75.4, 75.1, 73.6, 73.4, 72.8, 71.6, 69.4, 69.1, 68.2, 65.6, 63.0, 62.0, 26.8, 19.2; HR-ESI-MS (*m/z*): calcd for C<sub>97</sub>H<sub>100</sub>O<sub>17</sub>Si [M + Na]<sup>+</sup> 1588.6622, found 1588.6654.

**[4-*O*-benzoyl-2,3-di-*O*-benzyl- $\alpha$ -D-galactopyranosyl]-(1→6)-(2,3,4-tri-*O*-benzyl- $\alpha$ -D-glucopyranosyl)-(1↔1)-2,3-di-*O*-benzyl-4,6-*O*-benzylidene- $\alpha$ -D-glucopyranoside (**13**):**

To a solution of compound **6** (0.15 g, 0.10 mmol) in anhydrous THF (2.8 mL), TBAF (0.51 mL, 1 M solution in THF) was added dropwise at 0 °C. The reaction mixture was warmed to RT after 20 min. Progress of the reaction was monitored by TLC. After 6 h, the reaction mixture was taken in a separating funnel in ethyl acetate. The ethyl acetate layer was washed with brine (3 × 10 mL). The organic layer was dried over Na<sub>2</sub>SO<sub>4</sub>, filtered and concentrated. Column chromatography of the residue on the silica gel (1:2 ethyl acetate: pet ether) yielded the product **13** (0.117 g, 92%):  $[\alpha]_D^{25} +55.6$  (*c* 1.9, CHCl<sub>3</sub>); IR (CHCl<sub>3</sub>)  $\nu$  3486, 3030, 2937, 1722, 1602, 1496, 1454, 1274, 754, 697 cm<sup>-1</sup>; <sup>1</sup>H NMR (500 MHz, CDCl<sub>3</sub>)  $\delta$  8.00 (d, *J* = 10 Hz, 2H, OBz), 7.59-7.15 (m, 43H, ArH), 5.56 (d, *J* = 2.5 Hz, 1H, H-4), 5.55 (s, 1H, PhCH), 5.15 (d, *J* = 3.5 Hz, 1H, H-1), 5.09 (d, *J* = 3.5 Hz, 1H, H-1), 5.08 (d, *J* = 3.5 Hz, 1H, H-1), 4.96 (Ap. t, *J* = 11.5 Hz, 2H, PhCH<sub>2</sub>), 4.88-4.83 (m, 3H, PhCH<sub>2</sub>), 4.78 (d, *J* = 12.0 Hz, 1H, PhCH<sub>2</sub>), 4.78-4.54 (m, 8H, PhCH<sub>2</sub>), 4.26 (td, *J* = 5.0, 10.0 Hz, 1H), 4.19 (d, *J* = 10.0 Hz, 1H), 4.14-4.09 (m, 2H), 4.05 (t, *J* = 10.0 Hz, 1H), 3.96 (dd, *J* = 5.0, 10.0 Hz, 1H), 3.93-3.91 (m, 2H), 3.77 (t, *J* = 10.0 Hz, 1H), 3.69-3.63 (m, 3H), 3.61-3.55 (m, 2H), 3.53 (dd, *J* = 2.5, 8.0 Hz, 1H), 3.45 (dd, *J* = 4.0, 9.0 Hz, 2H); <sup>13</sup>C NMR (125 MHz, CDCl<sub>3</sub>)  $\delta$  167.1, 138.9, 138.8, 138.7, 138.6, 138.2, 138.1, 138.0, 137.5, 133.4, 130.0, 129.5, 128.9, 128.54, 128.50, 128.46, 128.41, 128.39, 128.36, 128.31, 128.2, 128.0, 127.9, 127.78, 127.74, 127.71, 127.6, 127.57,



127.50, 126.1, 101.2, 98.2, 94.8, 94.2, 82.4, 81.6, 79.7, 78.9, 78.6, 77.9, 75.5, 75.3, 75.1, 74.9, 73.6, 73.3, 72.5, 71.7, 71.1, 69.3, 69.0, 66.1, 62.9, 61.0; HR-ESI-MS ( $m/z$ ): calcd for  $C_{81}H_{82}O_{17}$   $[M + Na]^+$  1349.5444, found 1349.5463.

**[4-*O*-benzoyl-2,3-di-*O*-benzyl-6-*O*-*tert*butyldiphenylsilyl- $\alpha$ -D-galactopyranosyl]-(1 $\rightarrow$ 6)-[4-*O*-benzoyl-2,3-di-*O*-benzyl- $\alpha$ -D-galactopyranosyl]-(1 $\rightarrow$ 6)-(2,3,4-tri-*O*-benzyl- $\alpha$ -D-glucopyranosyl)-(1 $\leftrightarrow$ 1)-2,3-di-*O*-benzyl-4,6-*O*-benzylidene- $\alpha$ -D-glucopyranoside (**14**):**

The solution of the galactosyl thioglycoside donor **7** (82 mg, 0.104 mmol), the trisaccharide acceptor **13** (0.11 g, 0.082 mmol) and MS 3Å (0.2 g) in  $CH_2Cl_2$ :  $Et_2O$  (4.6 mL, 4:1) was stirred under nitrogen atmosphere at RT for about 1 h. The flask was cooled to 0 °C and NIS (34 mg, 0.15 mmol) was added followed by the dropwise addition of TfOH (1.8  $\mu$ L, 0.02 mmol) at 0 °C. The reaction mixture was stirred at 0 °C under nitrogen atmosphere for 1 h. The reaction was quenched by adding  $NEt_3$  (1 drop). The reaction mixture was diluted with  $CH_2Cl_2$ , filtered through Celite and transferred to a separating funnel. The organic layer was washed with aq.  $Na_2S_2O_3$  (2  $\times$  4 mL),  $NaHCO_3$ , brine, dried over  $Na_2SO_4$ , filtered and concentrated. Column chromatography of the residue over silica gel (1:3 ethyl acetate: pet ether) yielded the desired tetrasaccharide **14** (0.15 g, 89%):  $[\alpha]_D^{25} +42.6$  ( $c$  1.64,  $CHCl_3$ ); IR ( $CHCl_3$ )  $\nu$  2932, 1724, 1602, 1496, 1454, 1428, 1271, 756, 698  $cm^{-1}$ ;  $^1H$  NMR (500 MHz,  $CDCl_3$ )  $\delta$  8.03 (d,  $J = 7.0$  Hz, 2H, OBz), 7.94 (d,  $J = 7.0$  Hz, 2H, OBz), 7.60-7.08 (m, 66H, ArH), 5.90 (d,  $J = 3.0$  Hz, 1H, H-4), 5.87 (d,  $J = 2.5$  Hz, 1H, H-4), 5.57 (s, 1H, PhCH), 5.21 (d,  $J = 3.0$  Hz, 1H, H-1), 5.18 (d,  $J = 3.5$  Hz, 1H, H-1), 5.15 (d,  $J = 3.0$  Hz, 1H, H-1), 4.99 (d,  $J = 11.0$  Hz, 1H, PhCH<sub>2</sub>), 4.96 (d,  $J = 11.0$  Hz, 1H, PhCH<sub>2</sub>), 4.90-4.80 (m, 4H, PhCH<sub>2</sub>), 4.86 (d,  $J = 2.5$  Hz, 1H, H-1), 4.78-4.43 (m, 12H, PhCH<sub>2</sub>), 4.27-4.19 (m, 2H), 4.18 (dd,  $J = 4.0, 10.0$  Hz, 1H), 4.16-4.12 (m, 3H), 4.09 (t,  $J = 10.0$  Hz, 1H), 4.00 (dd,  $J = 4.0, 10.0$  Hz, 1H), 3.98 (dd,  $J = 4.0, 10.0$  Hz, 1H), 3.93 (dd,  $J = 4.0, 10.0$  Hz, 1H), 3.89-3.86 (m, 2H), 3.85 (dd,  $J = 4.0, 10.0$  Hz, 1H), 3.70 (dd,  $J = 5.0, 10.0$  Hz, 1H), 3.70-3.60 (m, 6H), 3.58 (dd,  $J = 4.0, 9.0$  Hz, 1H), 3.45 (dd,  $J = 3.0, 8.0$  Hz, 1H), 0.98 (s, 9H, TBDPS);  $^{13}C$  NMR (125 MHz,  $CDCl_3$ )  $\delta$  165.9, 165.6, 139.1, 138.9, 138.8, 138.79, 138.73, 138.4, 138.34, 138.31, 138.2, 137.7, 135.68, 135.61, 133.2, 133.0, 132.9, 130.3, 130.2, 130.1, 129.9, 129.79, 129.76, 129.0, 128.6, 128.57, 128.53, 128.46, 128.43, 128.36, 128.34, 128.32, 128.2, 128.17, 128.12, 128.04, 128.01, 127.88, 127.82, 127.78, 127.73, 127.70, 127.66, 127.62, 127.57, 127.54, 127.50, 126.3, 101.3, 98.6, 98.5, 94.7, 94.1, 82.5, 81.8, 79.8, 78.8, 78.7, 77.7, 76.8, 75.78, 75.70, 75.6, 75.5, 75.4, 75.1, 73.5, 73.4, 73.3, 72.8, 72.1, 71.8, 71.5, 69.7, 69.1, 68.6, 68.2,

67.8, 66.5, 66.0, 63.0, 62.1, 26.8, 19.1; HR-ESI-MS ( $m/z$ ): calcd for  $C_{124}H_{126}O_{23}Si$  [ $M + K$ ]<sup>+</sup> 2050.8123, found 2050.8121.

**( $\alpha$ -D-galactopyranosyl)-(1 $\rightarrow$ 6)-( $\alpha$ -D-galactopyranosyl)-(1 $\rightarrow$ 6)- $\alpha$ , $\alpha$ -D-glucopyranosyl)-(1 $\leftrightarrow$ 1)- $\alpha$ -D-glucopyranoside (2):**

To a solution of compound **14** (0.14 g, 0.07 mmol) in anhydrous THF (2 mL), TBAF (0.35 mL, 1 M solution in THF) was added dropwise at 0 °C. The reaction mixture was warmed to RT after 20 min. Progress of the reaction was monitored by TLC. After 8 h, the reaction mixture was taken in a separating funnel in ethyl acetate. The ethyl acetate layer was washed with brine (3  $\times$  5 mL). The organic layer was dried over  $Na_2SO_4$ , filtered and concentrated. Column chromatography of the residue on silica gel (1:2 ethyl acetate: pet ether) yielded the tetrasaccharide mono-ol product (0.124 g, 91%):  $[\alpha]_D^{25} +44.8$  ( $c$  1.68,  $CHCl_3$ ); IR ( $CHCl_3$ )  $\nu$  3485, 3030, 2932, 1722, 1496, 1453, 1273, 1108, 754, 697  $cm^{-1}$ ;  $^1H$  NMR (500 MHz,  $CDCl_3$ )  $\delta$  8.10 (d,  $J = 8.0$  Hz, 2H, OBz), 8.02 (d,  $J = 8.0$  Hz, 2H, OBz), 7.64-7.21 (m, 56H, ArH), 5.91 (d,  $J = 2.5$  Hz, 1H, H-4), 5.65 (d,  $J = 2.5$  Hz, 1H, H-4), 5.59 (s, 1H, PhCH), 5.24 (d,  $J = 3.5$  Hz, 1H, H-1), 5.18 (d,  $J = 4.0$  Hz, 1H, H-1), 5.17 (d,  $J = 3.5$  Hz, 1H, H-1), 5.02 (d,  $J = 11.0$  Hz, 1H, PhCH<sub>2</sub>), 4.98 (d,  $J = 11.0$  Hz, 1H, PhCH<sub>2</sub>), 4.91 (d,  $J = 3.5$  Hz, 1H, H-1), 4.90-4.52 (m, 16H, PhCH<sub>2</sub>), 4.29-4.26 (m, 3H), 4.18-4.09 (m, 3H), 4.07 (dd,  $J = 4.0, 9.0$  Hz, 1H), 4.03 (dd,  $J = 4.0, 9.0$  Hz, 1H), 3.97-3.93 (m, 2H), 3.85 (t,  $J = 10.0$  Hz, 2H), 3.73-3.71 (m, 4H), 3.67 (t,  $J = 10.0$  Hz, 2H), 3.62 (dd,  $J = 2.5, 7.8$  Hz, 2H), 3.51 (dd,  $J = 3.0, 8.0$  Hz, 2H);  $^{13}C$  NMR (125 MHz,  $CDCl_3$ )  $\delta$  167.1, 165.9, 139.1, 139.0, 138.8, 138.5, 138.38, 138.34, 138.28, 138.24, 137.7, 133.5, 133.2, 130.2, 130.1, 129.6, 129.0, 128.63, 128.61, 128.57, 128.55, 128.47, 128.44, 128.38, 128.33, 128.13, 128.10, 128.05, 128.01, 127.9, 127.8, 127.75, 127.73, 127.68, 127.63, 127.5, 126.2, 101.3, 98.9, 98.5, 94.7, 94.0, 82.4, 81.7, 79.8, 78.8, 78.7, 77.7, 76.3, 75.6, 75.4, 75.0, 73.5, 73.4, 73.3, 72.9, 72.1, 71.6, 69.9, 69.2, 69.1, 68.7, 67.8, 66.2, 63.0, 61.2; HR-ESI-MS ( $m/z$ ): calcd for  $C_{108}H_{108}O_{23}$  [ $M + Na$ ]<sup>+</sup> 1796.7207, found 1796.7211.

The tetrasaccharide mono-ol product (80 mg, 0.05 mmol) was dissolved in anhydrous methanol (2 mL) followed by the addition of NaOMe (10 mg). The solution was stirred at RT under nitrogen atmosphere for 12 h. The reaction was quenched by adding Amberlite IR120H<sup>+</sup> (40 mg). The solution was filtered using methanol. The filtrate was concentrated under reduced pressure and the column chromatography of the residue on silica gel (9:1 ethyl acetate: pet ether) yielded the tetrasaccharide triol product (64 mg, 91%):  $[\alpha]_D^{25} -52.1$  ( $c$  0.96,  $CHCl_3$ ); IR ( $CHCl_3$ )  $\nu$  3463, 3030, 2927, 1497, 1454, 1215, 1091, 1027, 754, 697  $cm^{-1}$ ;  $^1H$

NMR (400 MHz, CDCl<sub>3</sub>)  $\delta$  7.54-7.21 (m, 50H, ArH), 5.57 (s, 1H, PhCH), 5.21 (d,  $J = 4.0$  Hz, 1H, H-1), 5.13 (d,  $J = 3.6$  Hz, 1H, H-1), 5.01 (d,  $J = 3.2$  Hz, 1H, H-1), 4.99 (d,  $J = 11.2$  Hz, 1H, PhCH<sub>2</sub>), 4.95 (d,  $J = 12.0$  Hz, 1H, PhCH<sub>2</sub>), 4.87 (d,  $J = 4.0$  Hz, 1H, H-1), 4.85 (d,  $J = 11.0$  Hz, 1H, PhCH<sub>2</sub>), 4.74 (Ap. t,  $J = 11.6$  Hz, 6H, PhCH<sub>2</sub>), 4.69-4.58 (m, 9H, PhCH<sub>2</sub>), 4.28-4.21 (m, 2H), 4.16-4.10 (m, 3H), 4.07 (t,  $J = 8.0$  Hz, 1H), 4.02 (d,  $J = 2.8$  Hz, 1H), 3.91-3.84 (m, 3H), 3.86 (dd,  $J = 3.0, 10.0$  Hz, 2H), 3.81 (dd,  $J = 3.0, 10.0$  Hz, 2H), 3.78-3.71 (m, 5H), 3.66 (dd,  $J = 4.0, 10.0$  Hz, 2H), 3.62-3.57 (m, 2H), 3.48 (dd,  $J = 3.6, 9.6$  Hz, 1H), 2.94-2.75 (2 $\times$ bs, OH); <sup>13</sup>C NMR (125 MHz, CDCl<sub>3</sub>)  $\delta$  139.0, 138.9, 138.83, 138.80, 138.4, 138.3, 138.29, 138.21, 138.1, 137.6, 129.0, 128.67, 128.63, 128.55, 128.52, 128.50, 128.47, 128.43, 128.3, 128.08, 128.06, 127.95, 127.93, 127.91, 127.87, 127.85, 127.83, 127.80, 127.77, 127.70, 127.59, 127.53, 126.2, 101.3, 98.6, 98.2, 94.7, 94.1, 82.4, 81.7, 79.8, 78.8, 78.6, 77.8, 77.5, 76.8, 76.0, 75.66, 75.60, 75.3, 74.9, 73.5, 73.4, 73.0, 72.6, 72.4, 71.4, 69.5, 69.1, 68.9, 68.1, 67.6, 67.4, 66.2, 63.1, 63.0; HR-ESI-MS ( $m/z$ ): calcd for C<sub>94</sub>H<sub>100</sub>O<sub>21</sub> [M + Na]<sup>+</sup> 1588.6649, found 1588.6690.

The tetrasaccharide triol (60 mg, 0.04 mmol) and 20% Pd(OH)<sub>2</sub>/C (140 mg) in acetic acid: water (20 mL, 1:1) was stirred under hydrogen atmosphere for 20 h. the solution was filtered through Celite pad and concentrated under reduced pressure and the column chromatography of the residue on silica gel (7:3 methanol: CH<sub>2</sub>Cl<sub>2</sub>) yielded the tetrasaccharide product **2** (26 mg, 98%):  $[\alpha]^{25}_D +81.9$  ( $c$  0.52, MeOH: H<sub>2</sub>O = 1:1); <sup>1</sup>H NMR (500 MHz, CD<sub>3</sub>OD)  $\delta$  5.14 (d,  $J = 3.5$  Hz, 1H, H-1), 5.13 (d,  $J = 3.5$  Hz, 1H, H-1), 4.93 (d,  $J = 4.0$  Hz, 2H, H-1), 4.13-4.06 (m, 2H), 3.94-3.86 (m, 6H), 3.85-3.76 (m, 7H), 3.75-3.66 (m, 5H), 3.56-3.51 (m, 2H), 3.41-3.34 (m, 2H); <sup>13</sup>C NMR (125 MHz, D<sub>2</sub>O)  $\delta$  97.9, 97.6, 93.4, 93.3, 72.8, 72.5, 72.2, 70.9, 70.4, 69.7, 69.6, 69.5, 69.3, 69.2, 68.7, 68.3, 68.2, 66.4, 65.3, 61.1, 60.5; HR-ESI-MS ( $m/z$ ): calcd for C<sub>24</sub>H<sub>42</sub>O<sub>21</sub> [M + Na]<sup>+</sup> 689.2111, found 689.2117.

Note: Due to low solubility of compound **2** in CD<sub>3</sub>OD, the <sup>13</sup>C NMR spectrum was recorded using D<sub>2</sub>O as a solvent.

#### **Phenyl 6-*O*-benzoyl-2,3,4-tri-*O*-benzyl-1-thio- $\beta$ -D-glucopyranoside (**8**):**

To an ice-cooled solution of phenyl 2,3,4-tri-*O*-benzyl-1-thio- $\beta$ -D-glucopyranoside (0.28 g, 0.516 mmol) in CH<sub>2</sub>Cl<sub>2</sub> (3 mL) were added pyridine (0.21 mL, 2.58 mmol) and BzCl (0.09 mL, 0.774 mmol). The mixture was stirred at rt for 30 minutes, then diluted with CH<sub>2</sub>Cl<sub>2</sub> (10 mL) and washed with NaHCO<sub>3</sub> solution (2 $\times$ 5 mL), dried on anhydrous Na<sub>2</sub>SO<sub>4</sub> and concentrated in vacuo. Purification by silica gel column chromatography (1:4 ethyl acetate: pet ether) afforded Phenyl 6-*O*-Benzoyl-2,3,4-tri-*O*-benzyl-1-thio- $\beta$ -D-glucopyranoside **8** as

white solid (0.327 g, 98%).  $[\alpha]_D^{20} +4.388$  ( $c$  0.67,  $\text{CHCl}_3$ ); IR ( $\text{CHCl}_3$ )  $\nu$  3030, 2101, 1719, 1454, 1274, 1067, 752, 698  $\text{cm}^{-1}$ ;  $^1\text{H}$  NMR (400 MHz,  $\text{CDCl}_3$ )  $\delta$  8.03 (d,  $J = 7.2$  Hz, 2H, ArH), 7.62-7.11 (m, 23H, ArH), 4.95-4.85 (m, 4H,  $\text{CH}_2\text{Ph}$ ), 4.76-4.61 (m, 4H,  $\text{CH}_2\text{Ph}$ , H1, H6b), 4.43 (dd,  $J = 11.6, 4.8$  Hz, 1H, H6a), 3.77 (t,  $J = 8.8$  Hz, 1H, H3), 3.68-3.67 (m, 1H, H5), 3.66 (t,  $J = 8.8$  Hz, 1H, H4), 3.53 (t,  $J = 9.2$  Hz, 1H, H2);  $^{13}\text{C}$  NMR (125 MHz,  $\text{CDCl}_3$ )  $\delta$  166.3, 138.3, 138.1, 137.7, 134.7, 133.4, 133.3, 132.5, 130.7, 130.1, 129.9, 129.0, 129.0, 128.7, 128.64, 128.57, 128.35, 128.27, 128.22, 128.11, 128.08, 128.04, 127.8, 87.5, 86.9, 80.9, 77.7, 77.4, 76.2, 75.6, 75.4, 63.7; HRMS calcd for  $\text{C}_{40}\text{H}_{38}\text{O}_6\text{S}$   $[\text{M} + \text{Na}]^+$  669.2281, found 669.2271.

**[2,3-di-*O*-benzyl-4-*O*-benzoyl-6-*O*-tertbutyldiphenylsilyl- $\alpha$ -D-galactopyranosyl]-(1 $\rightarrow$ 6)-(2,3,4-tri-*O*-benzyl- $\alpha$ -D-glucopyranosyl)-(1 $\leftrightarrow$ 1)-2,3,6-tri-*O*-benzyl- $\alpha$ -D-glucopyranoside (15):**

To a solution of compound **11** (100 mg, 0.064 mmol) in  $\text{CH}_2\text{Cl}_2$  (1 mL), was added 1 M  $\text{Et}_3\text{SiH}$  (in THF) at 0  $^\circ\text{C}$  (ice bath) under a  $\text{N}_2$  atmosphere, after 10 min TfOH was added in a drop wise manner. The reaction mixture was stirred for 1 h and then quenched by addition of  $\text{NaHCO}_3$  solution at the same temperature and then brought to rt. The crude product was extracted in  $\text{CH}_2\text{Cl}_2$  (10 mL  $\times$  2), dried on anhydrous  $\text{Na}_2\text{SO}_4$  and concentrated *in vacuo*. Purification by silica gel column chromatography (1:4 ethyl acetate: pet ether) afforded compound **15** as colorless sticky solid (60 mg, 60%) along with benzylidene acetal hydrolyzed byproduct (25%, 23.6 mg).  $[\alpha]_D^{20} +50.1$  ( $c$  1.84,  $\text{CHCl}_3$ ); IR ( $\text{CHCl}_3$ )  $\nu$  3464, 3030, 2932, 2778, 1726, 1496, 1454, 1361, 1272, 1215, 1110, 754, 698  $\text{cm}^{-1}$ ;  $^1\text{H}$  NMR (400 MHz,  $\text{CDCl}_3$ )  $\delta$  8.0 (d,  $J = 7.2$  Hz, 2H, ArH), 7.64-7.10 (m, 53H, ArH), 5.90 (d,  $J = 2.4$  Hz, 1H), 5.21 (d,  $J = 3.6$  Hz, 1H), 5.16 (d,  $J = 3.6$  Hz, 1H), 5.10 (d,  $J = 3.6$  Hz, 1H), 4.90 (t,  $J = 11.2$  Hz, 2H,  $\text{CH}_2\text{Ph}$ ), 4.88-4.44 (m, 14H,  $\text{CH}_2\text{Ph}$ ), 4.17-3.97 (m, 5H), 3.9-3.81 (m, 2H), 3.77 (t,  $J = 9.6$  Hz, 1H), 3.67-3.63 (m, 4H), 3.56-3.46 (m, 4H), 3.38 (dd,  $J = 9.6, 3.6$  Hz, 1H), 1.01 (s, 9H,  $\text{CH}_3$ );  $^{13}\text{C}$  NMR (125 MHz,  $\text{CDCl}_3$ )  $\delta$  165.7, 139.2, 138.98, 138.9, 138.8, 138.4, 138.4, 138.1, 135.7, 135.6, 133.3, 133.0, 130.5, 130.0, 129.9, 129.8, 128.7, 128.5, 128.4, 128.3, 128.1, 128.0, 127.9, 127.8, 127.7, 127.7, 127.6, 127.5, 127.4, 98.3, 93.9, 93.8, 81.8, 81.1, 79.8, 79.1, 77.9, 75.8, 75.8, 75.6, 75.4, 75.2, 73.8, 73.0, 72.8, 72.7, 71.6, 70.9, 70.7, 69.5, 69.4, 68.2, 65.6, 62.1, 26.9, 19.2; HRMS calcd for  $\text{C}_{97}\text{H}_{102}\text{O}_{17}\text{Si}$   $[\text{M} + \text{Na}]^+$  1589.6778, found 1589.6784.

**[2,3-di-*O*-benzyl-4-*O*-benzoyl-6-*O*-*tert*butyldiphenylsilyl- $\alpha$ -D-galactopyranosyl]-(1 $\rightarrow$ 6)-  
(2,3,4-tri-*O*-benzyl- $\alpha$ -D-glucopyranosyl)-(1 $\leftrightarrow$ 1)-4-*O*-acetyl-2,3,6-tri-*O*-benzyl- $\alpha$ -D-  
glucopyranoside:**

Pyridine (4.6  $\mu$ L, 0.05 mmol) and DMAP (0.3 mg, 0.0025 mmol) was added to a clear solution of **15** (18.0 mg, 0.01 mmol) in CH<sub>2</sub>Cl<sub>2</sub> (0.5 mL) at rt. Next, acetic anhydride (2.3  $\mu$ L, 0.02 mmol) was to the reaction mixture. Then, the reaction mixture was kept at room temperature for 1 h. After complete consumption of starting material, the reaction mixture was concentrated *in vacuo* and the obtained residue was purified by silica gel chromatography (1:4 ethyl acetate: pet ether) to obtain C4-OAc compound as a sticky solid (17.5 mg, 95%).  $[\alpha]_D^{20} +45.8$  (*c* 0.9, CHCl<sub>3</sub>); IR (CHCl<sub>3</sub>)  $\nu$  3029, 2931, 2856, 1805, 1745, 1725, 1454, 1361, 1272, 1162, 1107, 754, 698 cm<sup>-1</sup>; <sup>1</sup>H NMR (400 MHz, CDCl<sub>3</sub>)  $\delta$  8.00 (d, *J* = 7.2 Hz, 2H, ArH), 7.64-7.06 (m, 53H, ArH), 5.89 (d, *J* = 2.4 Hz, 1H), 5.17 (t, *J* = 3.2 Hz, 1H), 5.09 (d, *J* = 3.6 Hz, 1H), 5.06 (t, *J* = 9.6 Hz, 1H), 4.96 (d, *J* = 11.2 Hz, 1H, CH<sub>2</sub>Ph), 4.88-4.81 (m, 4H, CH<sub>2</sub>Ph), 4.67-4.36 (m, 12H, CH<sub>2</sub>Ph) 4.15-4.11 (m, 2H), 4.07-3.97 (m, 3H), 3.94 (t, *J* = 9.5 Hz, 1H), 3.83 (dd, *J* = 9.5, 3.6 Hz, 1H), 3.77 (t, *J* = 9.6 Hz, 1H), 3.71-3.52 (m, 5H), 3.37 (dd, *J* = 9.6, 3.6 Hz, 1H), 3.27-3.2 (m, 2H), 1.86 (s, 3H, CH<sub>3</sub>), 1.01 (s, 9H, CH<sub>3</sub>); <sup>13</sup>C NMR (125 MHz, CDCl<sub>3</sub>)  $\delta$  169.8, 165.7, 139.2, 138.98 138.9, 138.8, 138.4, 138.4, 138.1, 135.7, 135.6, 133.3, 133.0, 130.5 130.0, 129.9, 129.8, 128.7, 128.5, 128.4, 128.3, 128.1, 128.0, 127.9, 127.8, 127.7, 127.7, 127.6, 127.5, 127.4, 98.3, 93.4, 81.8, 81.1, 79.8, 79.1, 77.9, 75.8, 75.8, 75.6, 75.4, 75.2, 73.8, 73.0, 72.8, 72.7, 71.6, 70.9, 70.7, 69.5, 69.4, 68.2, 65.6, 62.1, 26.9, 21.1, 19.2; HRMS calcd for C<sub>99</sub>H<sub>104</sub>O<sub>18</sub>Si [M +Na]<sup>+</sup> 1631.6890, found 1631.6854.

**[4-*O*-benzoyl-2,3-di-*O*-benzyl-6-*O*-*tert*butyldiphenylsilyl- $\alpha$ -D-galactopyranosyl]-(1 $\rightarrow$ 6)-  
(2,3,4-tri-*O*-benzyl- $\alpha$ -D-glucopyranosyl)-(1 $\leftrightarrow$ 1)-(2,3,6-tri-*O*-benzyl- $\alpha$ -D-glucopyranosyl)-  
(4 $\rightarrow$ 1)-2,3,4-tri-*O*-benzyl-6-*O*-benzoyl- $\alpha$ -D-glucopyranoside (**16**):**

The solution of the donor **8** (0.06 g, 0.0893 mmol), acceptor **15** (0.07 g, 0.045 mmol) and MS 3Å (180 mg) in CH<sub>2</sub>Cl<sub>2</sub>/Et<sub>2</sub>O (2.1/1.5 mL) was stirred under nitrogen atmosphere at RT for 10 minutes. The flask was cooled to 0 °C and NIS (0.03 g, 0.134 mmol) was added followed by the dropwise addition of TfOH (2.4  $\mu$ L, 0.027 mmol) at 0 °C. The reaction mixture was stirred at 0 °C under nitrogen atmosphere for 2 h. The reaction was quenched by adding NEt<sub>3</sub> (2-3 drops). The reaction mixture was diluted with CH<sub>2</sub>Cl<sub>2</sub>, filtered through Celite and transferred to a separating funnel. The organic layer was washed with aq. Na<sub>2</sub>S<sub>2</sub>O<sub>3</sub> (2  $\times$  4 mL), NaHCO<sub>3</sub>, brine, dried over Na<sub>2</sub>SO<sub>4</sub>, filtered and concentrated. Column chromatography of the residue over silica gel yielded the desired tetrasaccharide **16** (0.075 g, 80%).  $[\alpha]_D^{20}$

+45.1 (*c* 1.31, CHCl<sub>3</sub>); IR (CHCl<sub>3</sub>)  $\nu$  3028, 2932, 2858, 1724, 1496, 1453, 1360, 1273, 1216, 1107, 754, 697 cm<sup>-1</sup>; <sup>1</sup>H NMR (400 MHz, CDCl<sub>3</sub>)  $\delta$  8.0 (t, *J* = 8.4 Hz, 4H, ArH), 7.64-7.07 (m, 71H, ArH), 5.9 (bs, 1H), 5.56 (d, *J* = 1.6 Hz, 1H), 5.21 (d, *J* = 3.6 Hz, 1H), 5.17 (d, *J* = 3.6 Hz, 1H), 5.08 (d, *J* = 3.6 Hz, 1H), 5.03-4.43 (m, 22H, CH<sub>2</sub>Ph), 4.32 (bs, 2H), 4.17-3.93 (m, 9H), 3.45-3.56 (m, 8H), 3.5-3.45 (m, 3H), 3.39 (dd, *J* = 9.6, 3.6 Hz, 1H), 1.01 (s, 9H, CH<sub>3</sub>); <sup>13</sup>C NMR (125 MHz, CDCl<sub>3</sub>)  $\delta$  166.3, 165.7, 139.3, 139.2, 138.9, 138.7, 138.5, 138.4, 138.2, 138.2, 138.0, 138.0, 135.7, 135.6, 133.3, 133.1, 133.0, 130.5, 130.2, 130.0, 129.9, 129.8, 129.2, 128.6, 128.6, 128.5, 128.5, 128.4, 128.4, 128.34, 128.28, 128.24, 128.17, 128.07, 127.85, 127.73, 127.71, 127.63, 127.6, 127.53, 127.44, 127.41, 127.1, 126.8, 98.3, 97.1, 94.0, 93.5, 81.96, 81.9, 81.5, 80.0, 79.8, 79.4, 77.9, 77.8, 75.9, 75.8, 75.7, 75.4, 75.17, 74.18, 74.0, 73.5, 72.99, 72.9, 72.8, 71.6, 70.63, 69.62, 69.5, 68.7, 68.2, 65.6, 63.5, 62.1, 26.9, 19.2; HRMS calcd for C<sub>131</sub>H<sub>134</sub>O<sub>23</sub>Si [M +Na]<sup>+</sup> 2125.8977, found 2125.8968.

**$\alpha$ -D-galactopyranosyl-(1 $\rightarrow$ 6)- $\alpha$ -D-glucopyranosyl-(1 $\leftrightarrow$ 1)- $\alpha$ -D-glucopyranosyl-(4 $\rightarrow$ 1)- $\alpha$ -D-glucopyranoside (3):**

To a solution of compound **16** (0.07 g, 0.033 mmol) in THF (1 mL) was added TBAF (0.17 mL, 0.166 mmol) at rt and the reaction mixture was stirred for 2 h. After complete conversion of starting material, reaction mixture was concentrated on rotary evaporator and purified by column chromatography to afford C6-OH derivative of compound **16** as a sticky solid (0.057 g, 92%). [ $\alpha$ ]<sub>D</sub><sup>20</sup> +53.5 (*c* 0.6, CHCl<sub>3</sub>); IR (CHCl<sub>3</sub>)  $\nu$  3463, 3029, 2928, 1722, 1453, 1360, 1274, 1216, 1158, 1106, 1070, 1027, 753, 697 cm<sup>-1</sup>; <sup>1</sup>H NMR (400 MHz, CDCl<sub>3</sub>)  $\delta$  8.00 (t, *J* = 8.3 Hz, 4H, ArH), 7.64-7.07 (m, 61H, ArH), 5.90 (bs, 1H), 5.53 (d, *J* = 3.2 Hz, 1H), 5.22 (d, *J* = 3.6 Hz, 1H), 5.17 (d, *J* = 3.6 Hz, 1H), 5.06-5.03 (m, 2H), 4.97-4.44 (m, 21H, CH<sub>2</sub>Ph), 4.31 (bs, 2H), 4.17-3.90 (m, 10H), 3.81-3.42 (m, 11H); <sup>13</sup>C NMR (125 MHz, CDCl<sub>3</sub>)  $\delta$  167.3, 166.3, 139.3, 139.1, 138.85, 138.71, 138.66, 138.37, 138.21, 138.18, 138.15, 138.09, 138.04, 133.57, 133.15, 130.18, 129.86, 129.78, 129.66, 128.67, 128.61, 128.59, 128.49, 128.43, 128.29, 128.24, 128.17, 128.11, 128.05, 128.0, 127.95, 127.87, 127.85, 127.75, 127.72, 127.68, 127.62, 127.44, 127.39, 127.09, 126.82, 126.78, 98.36, 97.16, 94.25, 93.79, 81.96, 81.87, 81.5, 80.02, 79.73, 79.6, 78.09, 77.82, 75.92, 75.73, 75.67, 75.39, 75.24, 75.13, 74.27, 74.17, 73.5, 73.1, 72.99, 72.62, 71.84, 71.3, 70.7, 69.6, 69.4, 68.7, 66.3, 63.5, 61.2; HRMS calcd for C<sub>115</sub>H<sub>116</sub>O<sub>23</sub>Si [M +Na]<sup>+</sup> 1887.7794, found 1887.7808

The solution of C6-OH derivative of compound **16** (35 mg, 18.8  $\mu$ mol) in methanolic NaOMe (0.2 M, 1 mL) was stirred at rt for 5 h. Reaction was monitored by LRMS and after complete conversion the reaction mixture was neutralized by addition of acidic resin

Amberlite IR 120 H+ (100 mg). The resin was filtered off, washed with methanol. The combined organic layer was concentrated, dried and used for next step without purification.

The intermediate obtained in the above step was dissolved in 50% aqueous AcOH (5 mL) at rt and Pd(OH)<sub>2</sub> (10%, 50 mg) was added to it. The reaction mixture was stirred for 24 h under H<sub>2</sub> atmosphere. After complete conversion as indicated by LRMS, the reaction mixture was filtered through Celite and washed with MeOH. The organic layer was concentrated on rotary evaporator and purified by column chromatography on silica gel (100-200 mesh) with gradient elution (1:9 methanol: CH<sub>2</sub>Cl<sub>2</sub> to 8:2 methanol: CH<sub>2</sub>Cl<sub>2</sub>) to afford desired product **3** as a white solid (11.5 mg, 92% over two steps).

$[\alpha]_D^{20} +65.96$  (*c* 0.5, MeOH:H<sub>2</sub>O = 1:1); <sup>1</sup>H NMR (500 MHz, CD<sub>3</sub>OD)  $\delta$  5.25 (bs, 1H), 5.15(bs, 2H), 4.85 (bs, 1H), 4.13-4.02 (m, 2H), 3.97-3.88 (m, 5H), 3.85-3.80 (m, 6H), 3.77-3.68 (m, 5H), 3.66-3.61 (m, 3H), 3.56-3.49 (m, 2H), 3.44-3.40 (m, 1H); <sup>13</sup>C NMR (125 MHz, CD<sub>3</sub>OD: MeOD 1:1)  $\delta$  100.6, 98.2, 93.64, 93.55, 78.6, 73.4, 73.0, 72.3, 71.4, 71.1, 71.0, 70.7, 70.1, 69.9, 69.7, 69.4, 68.7, 65.6, 61.1, 60.9, 60.6; HRMS calcd for C<sub>24</sub>H<sub>42</sub>O<sub>21</sub> [M +Na]<sup>+</sup> 689.2111, found 689.2113.

Note: Due to low solubility of compound **3** in CD<sub>3</sub>OD, the <sup>13</sup>C NMR spectrum was recorded using CD<sub>3</sub>OD: D<sub>2</sub>O (1:1) mixture as a solvent.

## II. Spectra

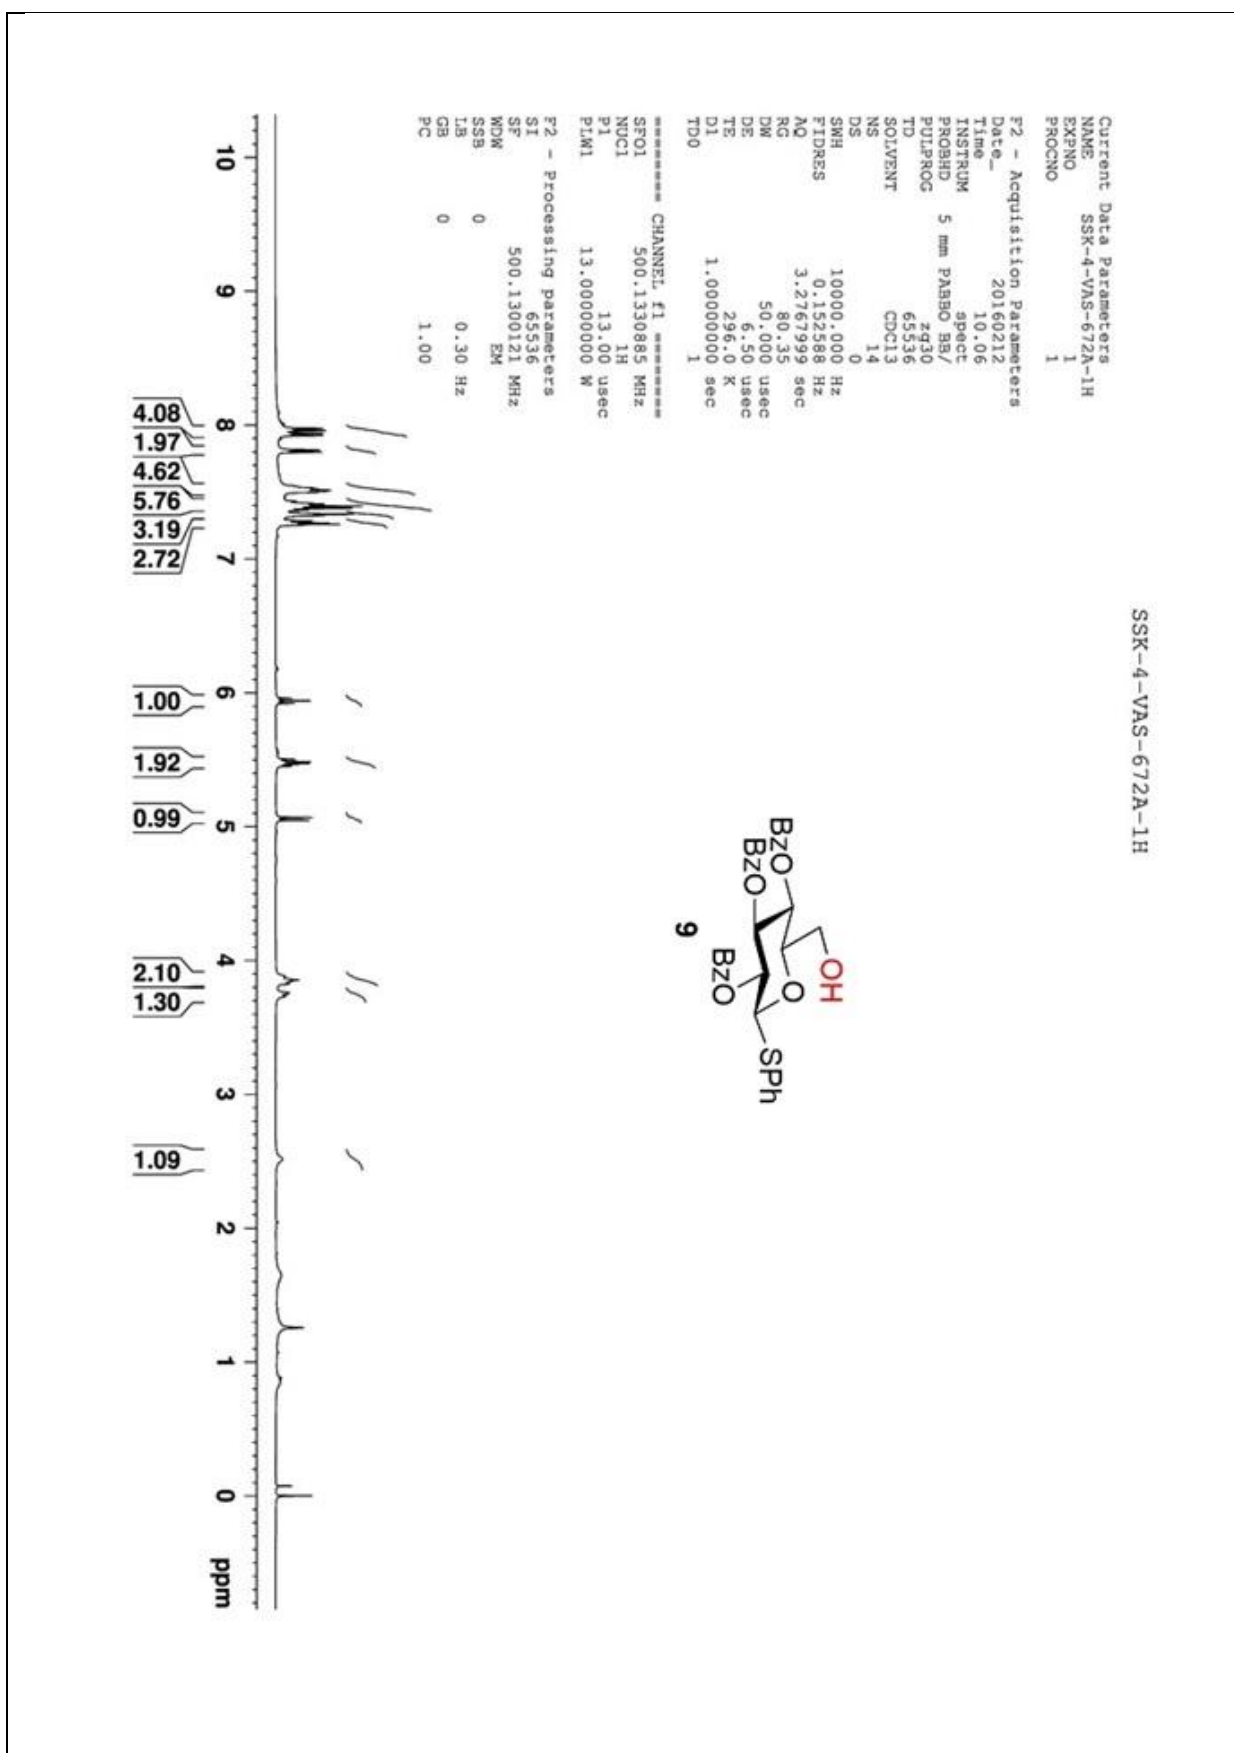



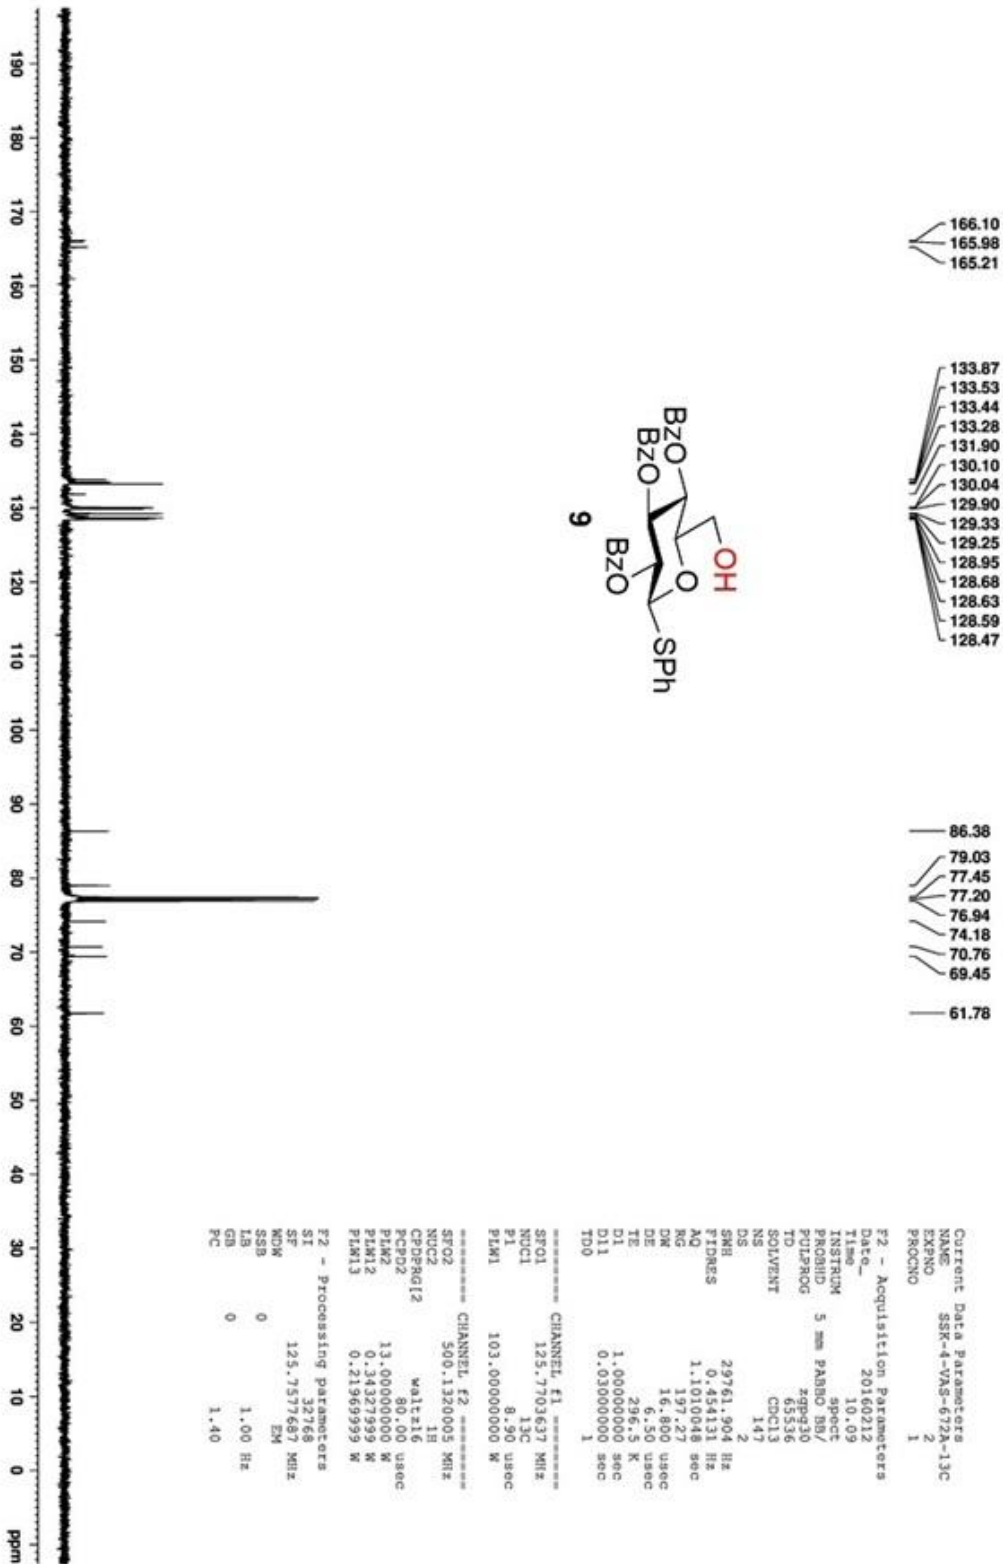

SSK-4-VAS-676-1H

NAME SSK-4-VAS-676-1H  
EXPNO 4  
PROCNO 1  
Date\_ 20160118  
Time 15.21  
INSTRUM spect  
PROBHD 5 mm SEI 1H/D-  
PULPROG zg30  
TD 54274  
SOLVENT CDCl3  
NS 75  
DS 0  
SMH 8223.685 Hz  
FIDRES 0.151522 Hz  
AQ 3.2999091 sec  
RG 32  
DM 60.800 usec  
DE 6.59 usec  
TE 294.3 K  
D1 1.00000000 sec  
TD0 1

CHANNEL F1  
NUC1 1H  
P1 14.75 usec  
PL1 -1.00 dB  
PL1W 10.56200695 W  
SFO1 400.1324710 MHz  
SI 32768  
SF 400.1300102 MHz  
WDW EM  
SSB 0  
LA 0.30 Hz  
GB 0  
PC 1.00

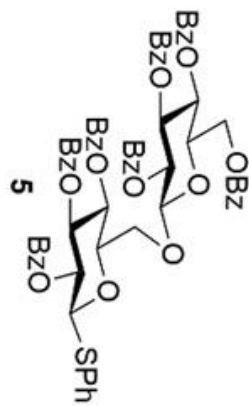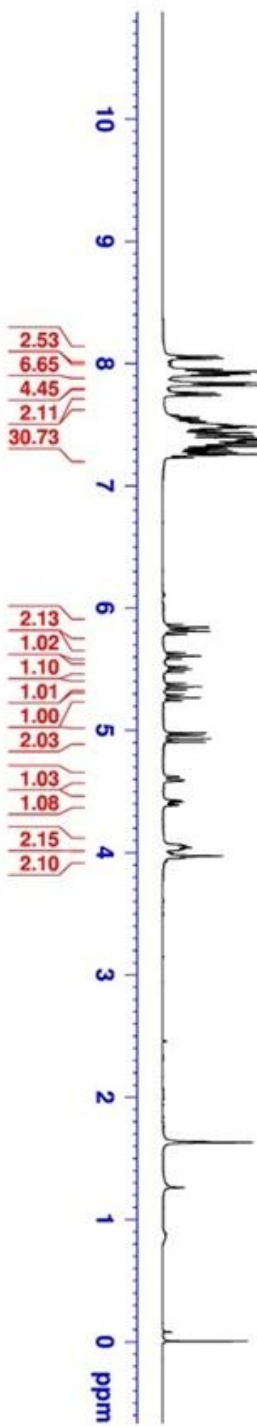

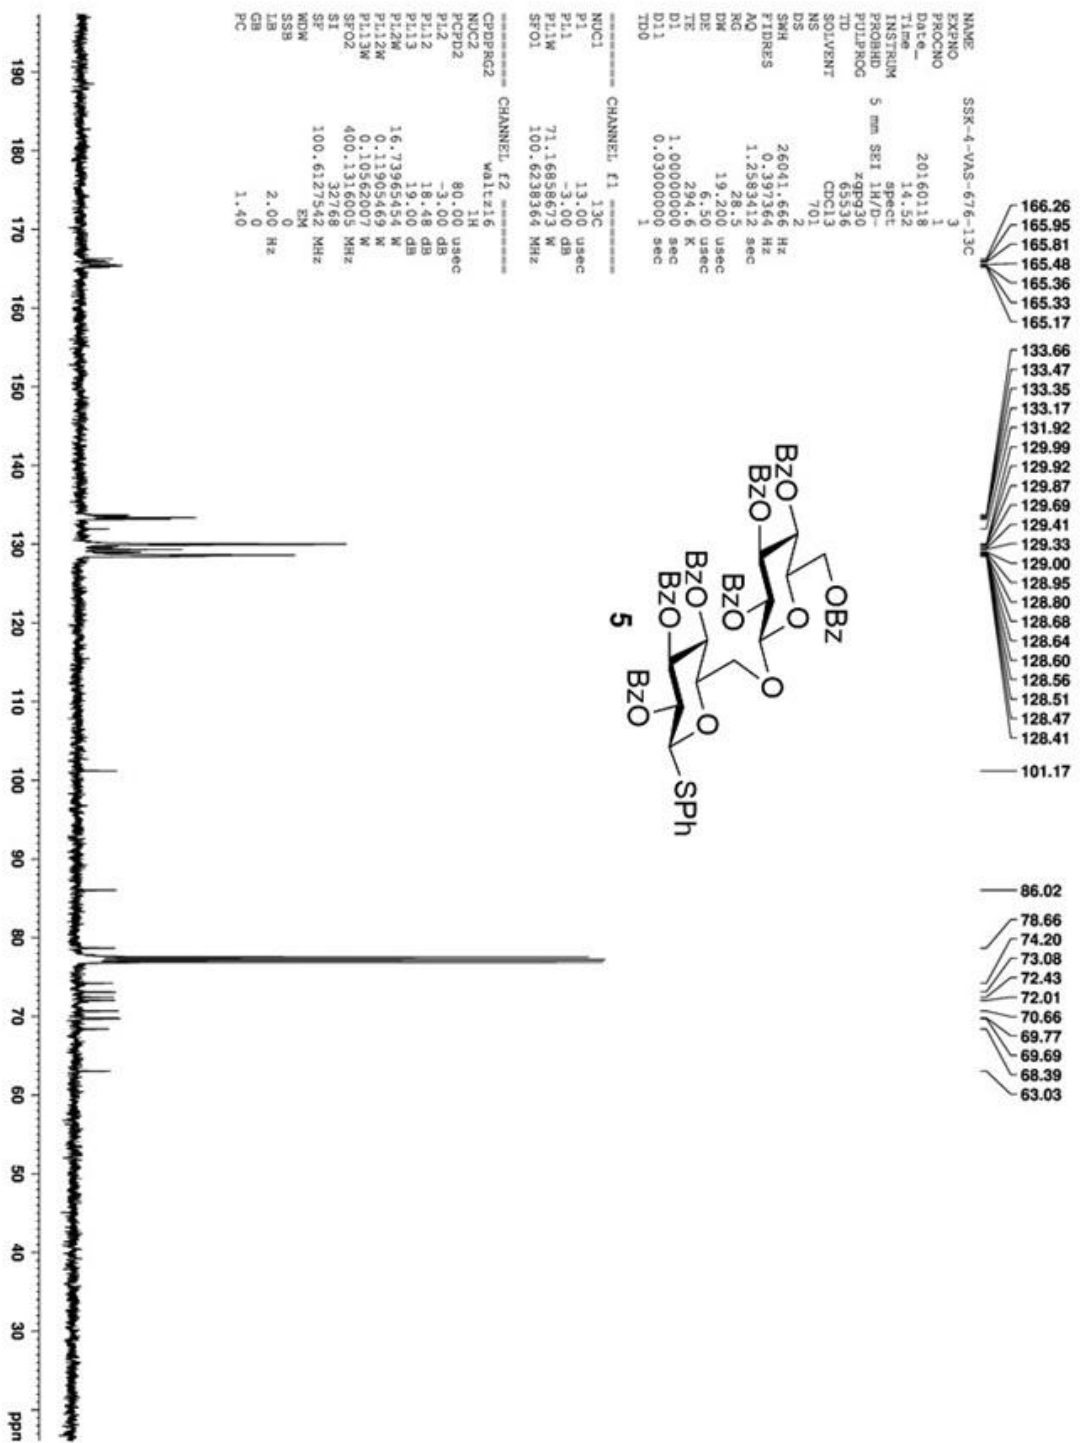

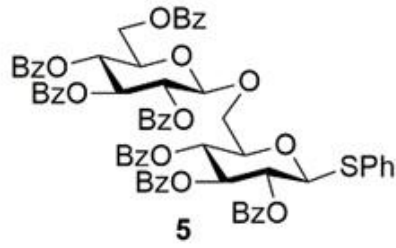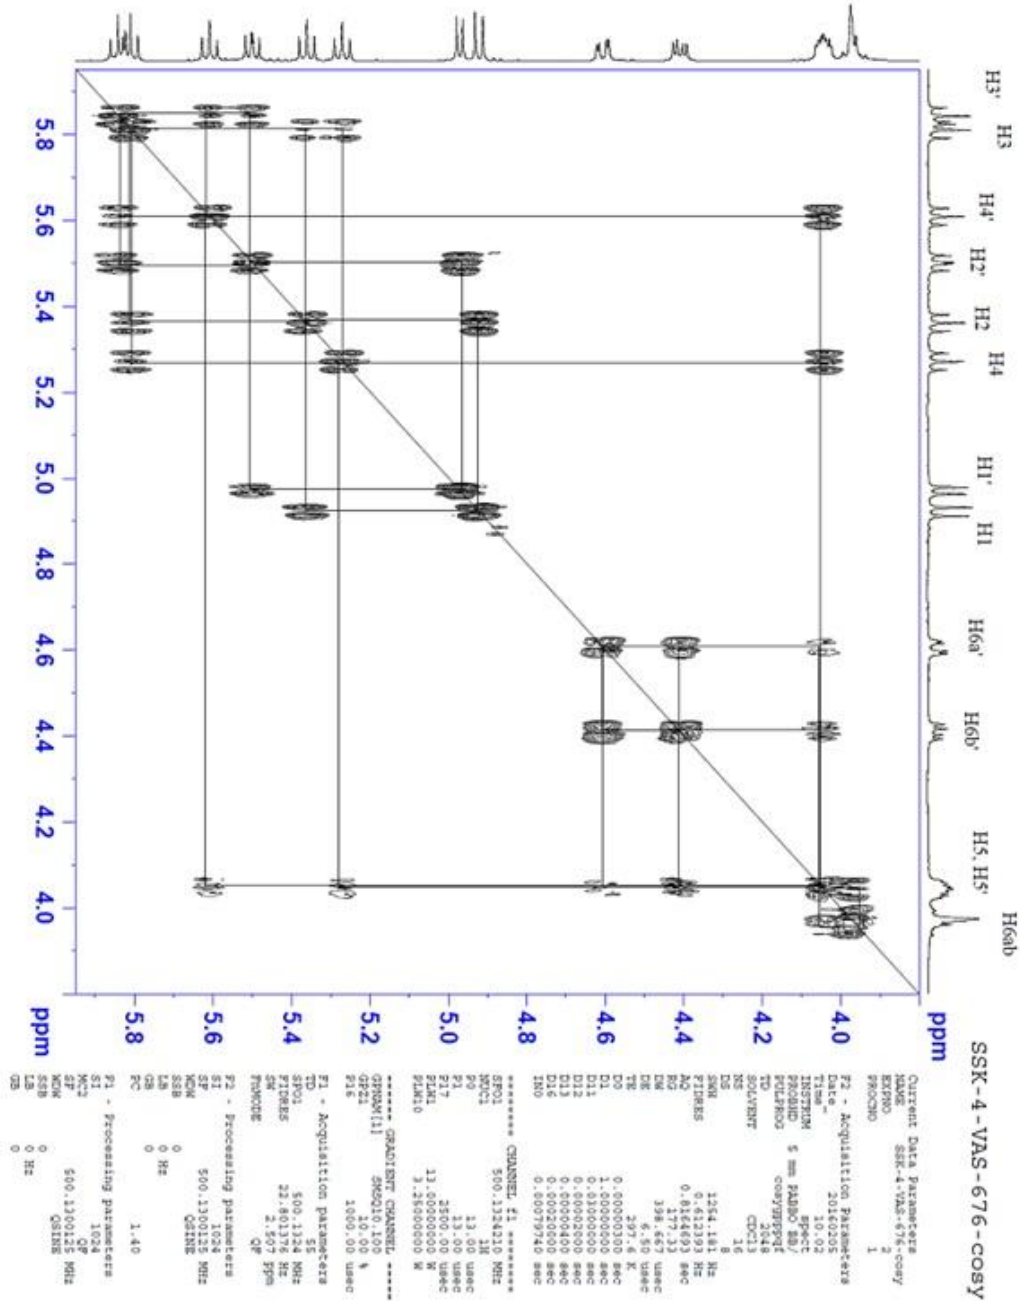

SSK-4-VAS-676-HSQC

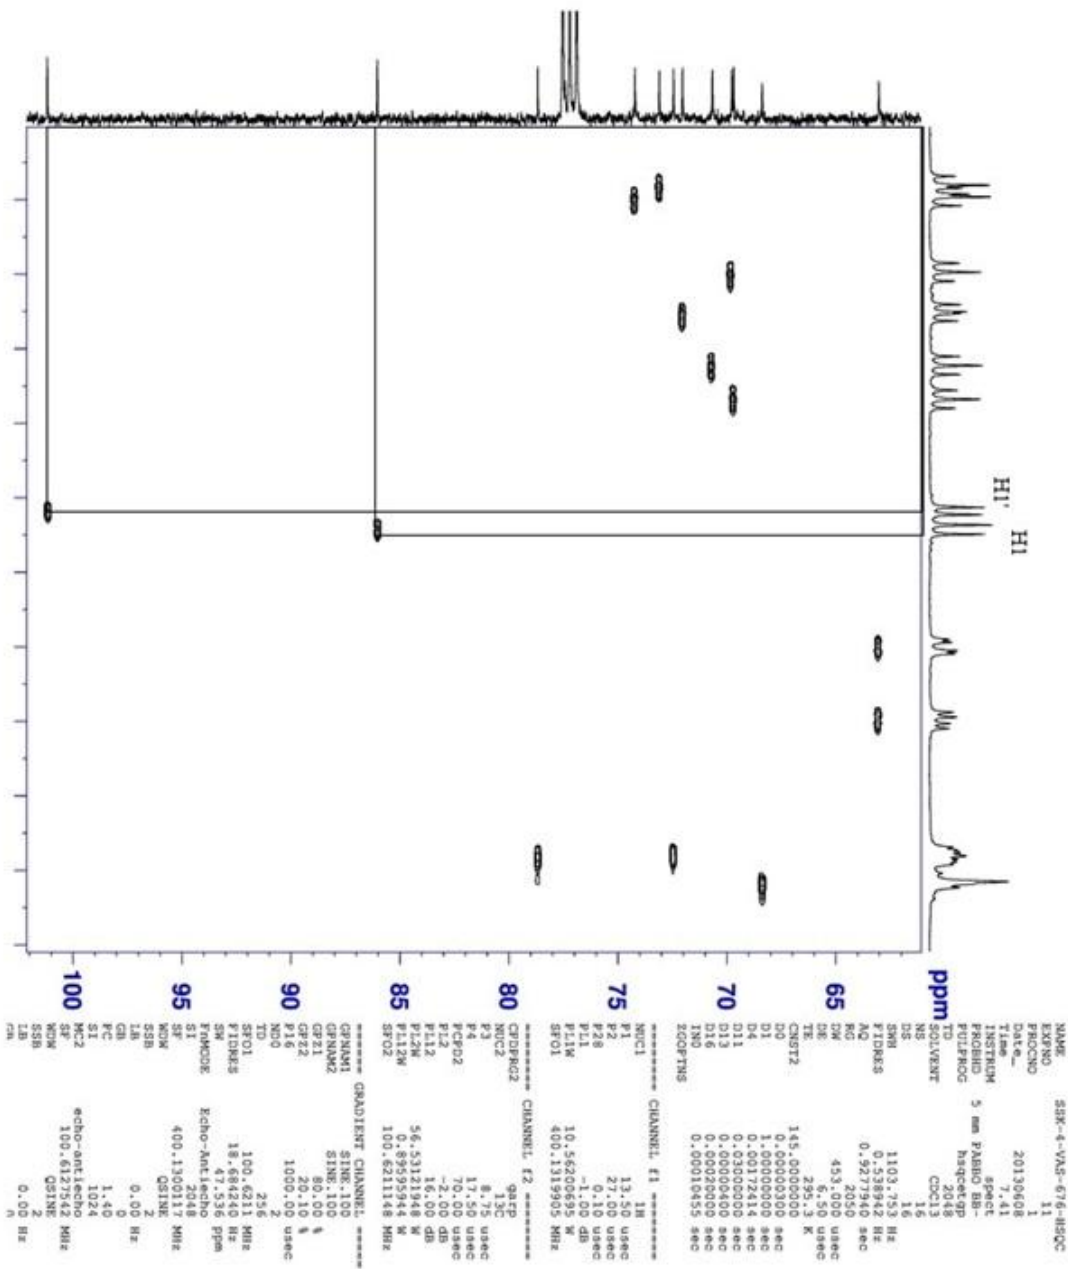

SSK-4-VAS-684-1H

NAME SSK-4-VAS-684-1H  
 EXPNO 3  
 PROCNO 1  
 Date\_ 20130619  
 Time 1.32  
 INSTRUM spect  
 PROBRD 5 mm PABBO BB-  
 PULPROG zg30  
 TD 49340  
 SOLVENT CDCl3  
 NS 17  
 DS 0  
 SMH 8223.685 Hz  
 FIDRES 0.166674 Hz  
 AQ 2.9999220 sec  
 RG 32  
 DM 60.800 usec  
 DE 6.59 usec  
 TE 295.3 K  
 D1 1.00000000 sec  
 TD0 1

CHANNEL F1  
 NUC1 1H  
 P1 13.50 usec  
 PL1 -1.00 dB  
 PL1W 10.56200695 W  
 SFO1 400.1324710 MHz  
 SI 32768  
 SF 400.1300202 MHz  
 WDW EM  
 SSB 0  
 LA 0  
 GB 0  
 PC 1.00

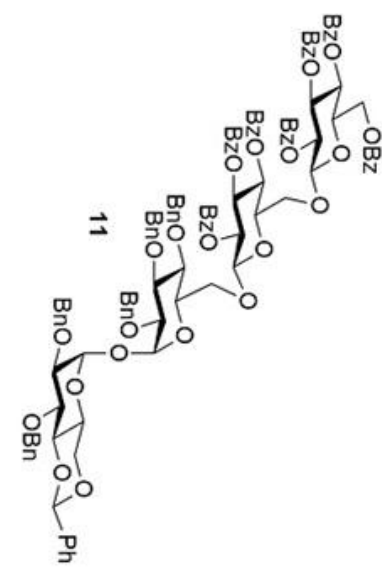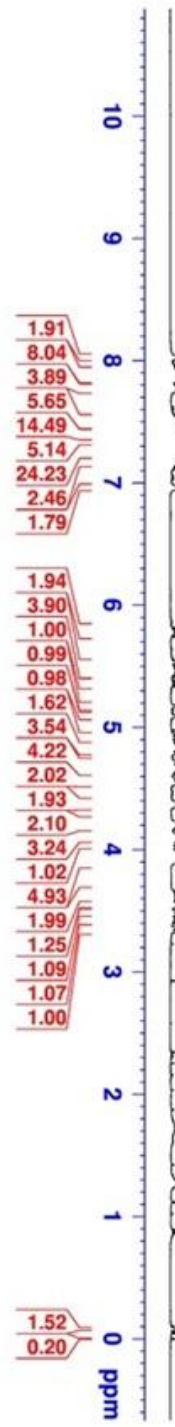

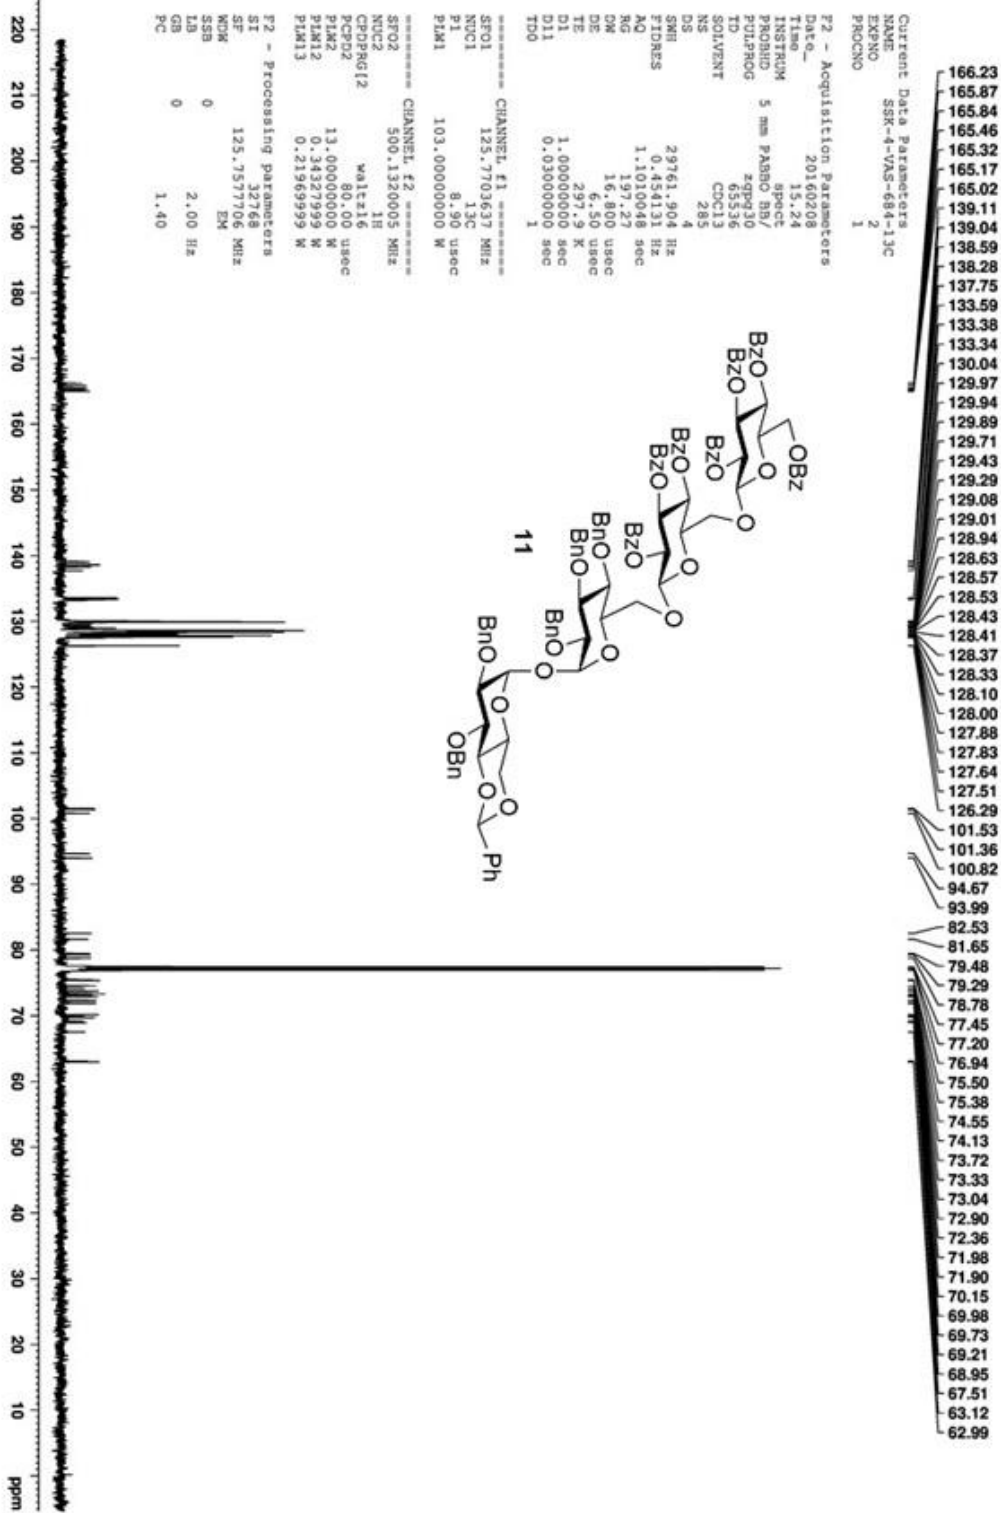





SSK-4-VAS-TF-1H

Current Data Parameters  
 NAME SSK-4-VAS-TF-1H  
 EXPRNO 4  
 PROCNO 1

F2 - Acquisition Parameters

Date\_ 20160120  
 Time 11.38  
 INSTRUM 5 mm PABBO BB/  
 PROBRD spect  
 PULPROG zg30  
 TD 65536  
 SOLVENT CDCl3  
 NS 50  
 DS 2  
 SMH 10000.000 Hz  
 FIDRES 0.152588 Hz  
 AQ 3.2767999 sec  
 RG 98.91  
 DW 50.000 usec  
 DE 6.50 usec  
 TE 296.1 K  
 D1 1.00000000 sec  
 TD0 1

===== CHANNEL f1 =====  
 SFO1 500.1330885 MHz  
 NUCL1 1H  
 P1 13.00 usec  
 PLW1 13.00000000 W

F2 - Processing parameters  
 SI 65536  
 SF 500.1319818 MHz  
 MDW EM  
 SSB 0  
 LB 0.30 Hz  
 GB 0  
 PC 1.00

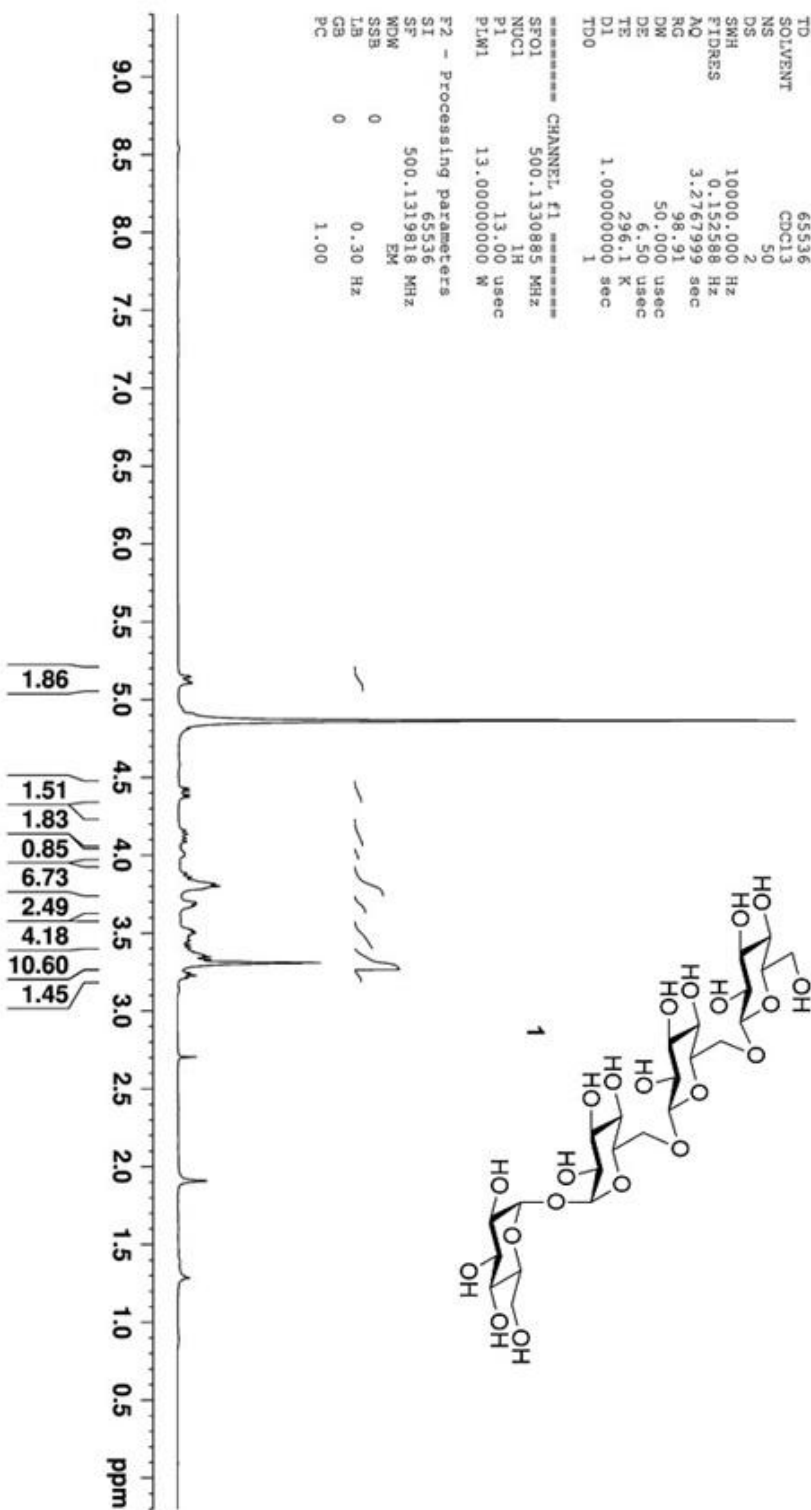

Current Data Parameters  
 NAME SSR-4-VAS-TF2-13C  
 EXPNO 2  
 PROCNO 1

F2 - Acquisition Parameters

Date\_ 20160130  
 Time 10.46  
 INSTRUM spect  
 PROBRD 5 mm PABBO BB/  
 PULPROG zgpg30  
 ID 63536  
 SOLVENT D2O  
 NS 598  
 DS 2  
 SMH 29761.904 Hz  
 FIDRES 0.454131 Hz  
 AQ 1.1010048 sec  
 RG 177.27  
 DM 19.800 usec  
 DE 6.50 usec  
 TE 296.3 K  
 D11 1.00000000 sec  
 D12 0.03000000 sec  
 D13 1

===== CHANNEL f1 =====  
 SFO1 125.7703637 MHz  
 NUCL1 13C  
 P1 8.50 usec  
 PL1 103.00000000 W

===== CHANNEL f2 =====  
 SFO2 500.1320005 MHz  
 NUCL2 1H  
 CPDPRG2 waltz16  
 PCPD2 80.00 usec  
 P1PC2 13.00000000 W  
 PL1C2 0.34327999 W  
 PL1C3 0.21969999 W

F2 - Processing parameters  
 SI 32768  
 SF 125.7577890 MHz  
 KOPW EM  
 SSB 0  
 LB 1.00 Hz  
 GB 0  
 PC 1.40

- 102.83
- 102.65
- 93.32
- 93.22
- 75.92
- 75.71
- 75.60
- 74.94
- 73.10
- 72.54
- 72.46
- 72.15
- 71.14
- 71.06
- 69.69
- 69.63
- 69.42
- 69.37
- 68.52
- 68.27
- 60.72
- 60.54

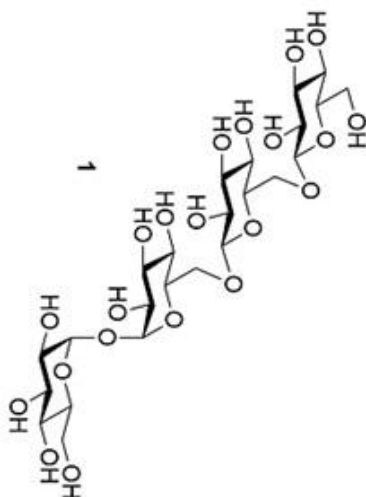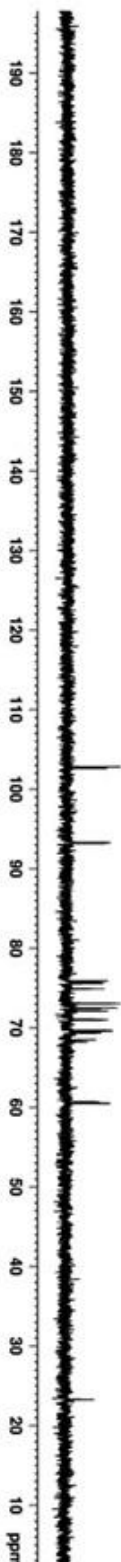

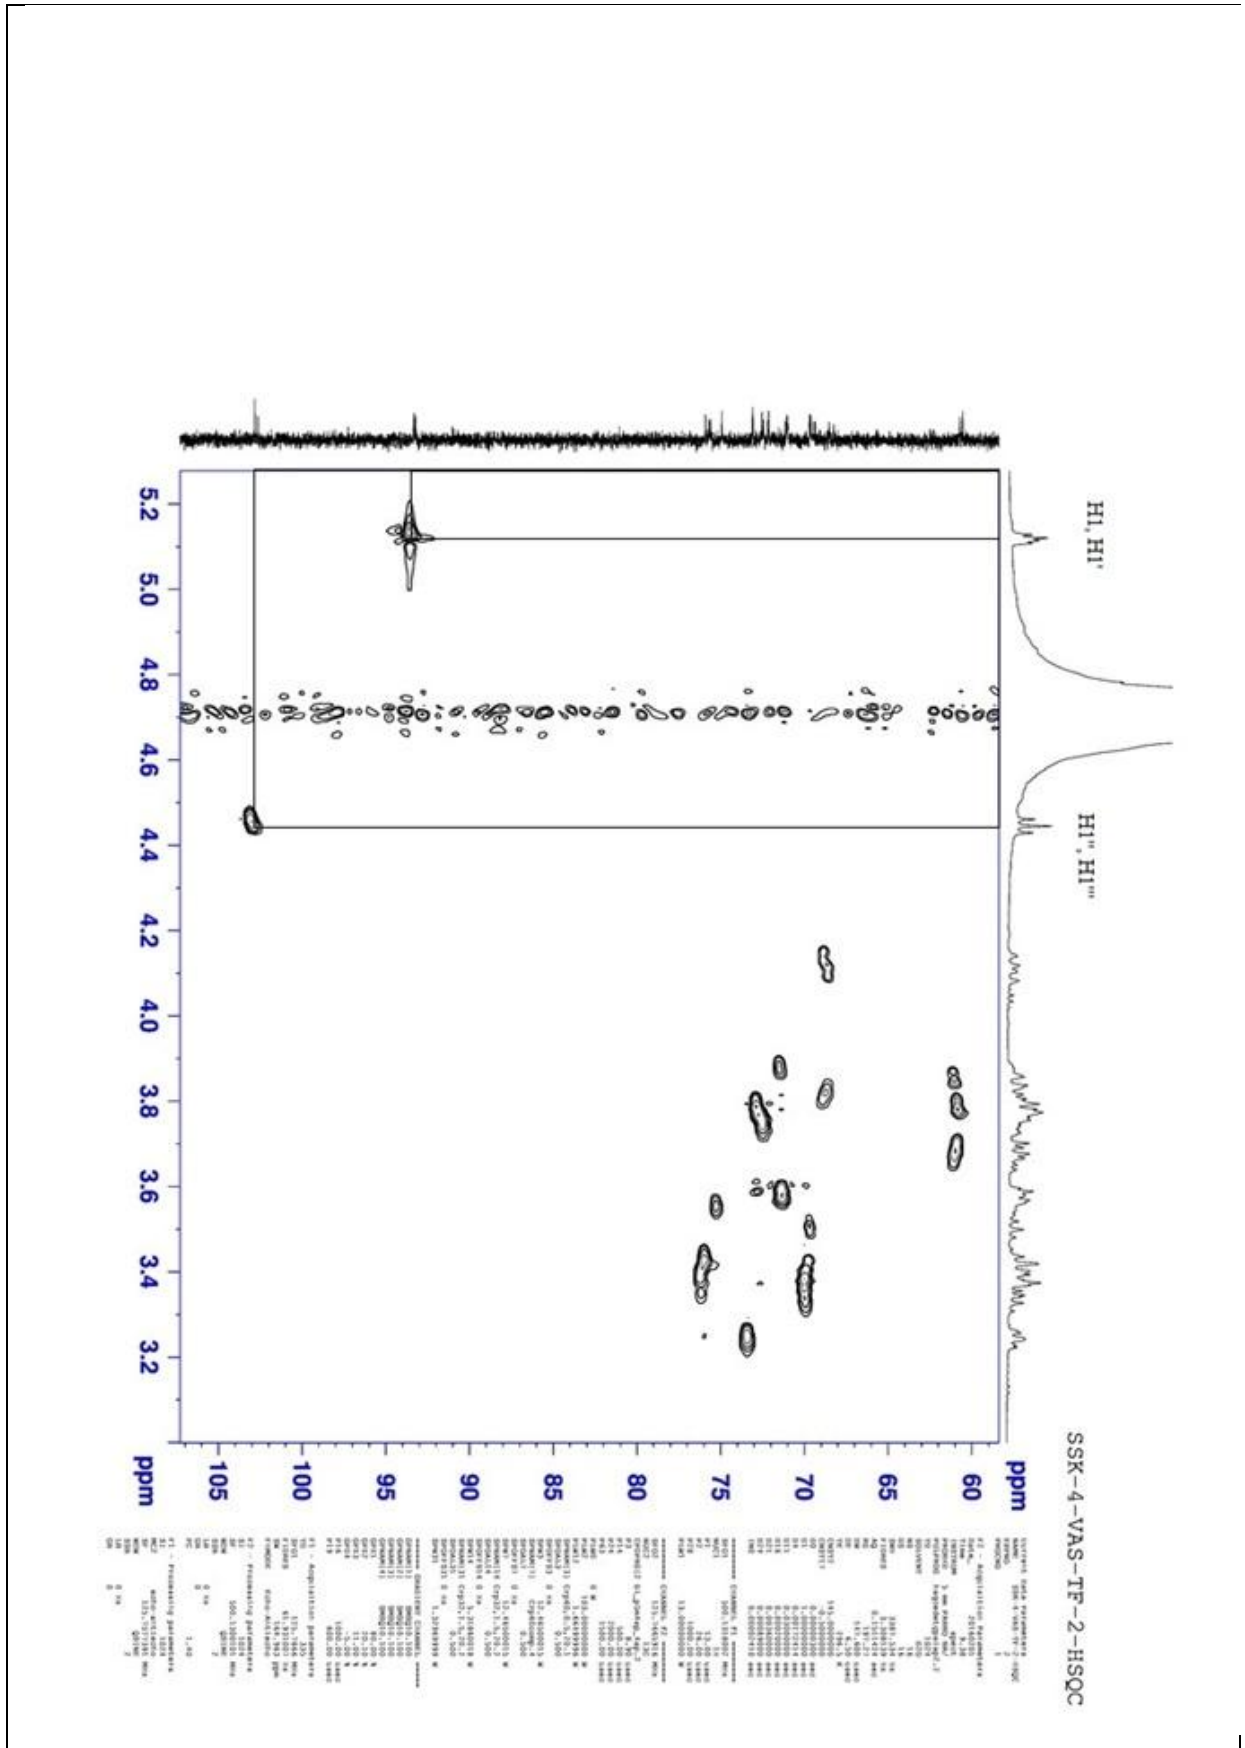

SSK-5-MAC-1235A-1H

Current Data Parameters  
 NAME ssk-5-mac-1235a-1h  
 EXPNO 3  
 PROCNO 1

F2 - Acquisition Parameters

Date\_ 20160219  
 Time\_ 21.09  
 INSTRUM spect  
 PROBHD 5 mm PABBO BB/  
 PULPROG zg30  
 TD 65536  
 SOLVENT CDCl3  
 NS 19  
 DS 0  
 SMH 10000.000 Hz  
 FIDRES 0.152588 Hz  
 AQ 3.276799 sec  
 RG 30.72  
 DW 50.000 usec  
 DE 6.50 usec  
 TE 296.7 K  
 D1 1.00000000 sec  
 TD0 1

==== CHANNEL f1 =====  
 SFO1 500.1330885 MHz  
 NUC1 1H  
 P1 13.00 usec  
 PLW1 13.00000000 W

F2 - Processing parameters  
 SI 65536  
 SF 500.1300205 MHz  
 WDW EM  
 SSB 0  
 GB 0  
 PC 1.00

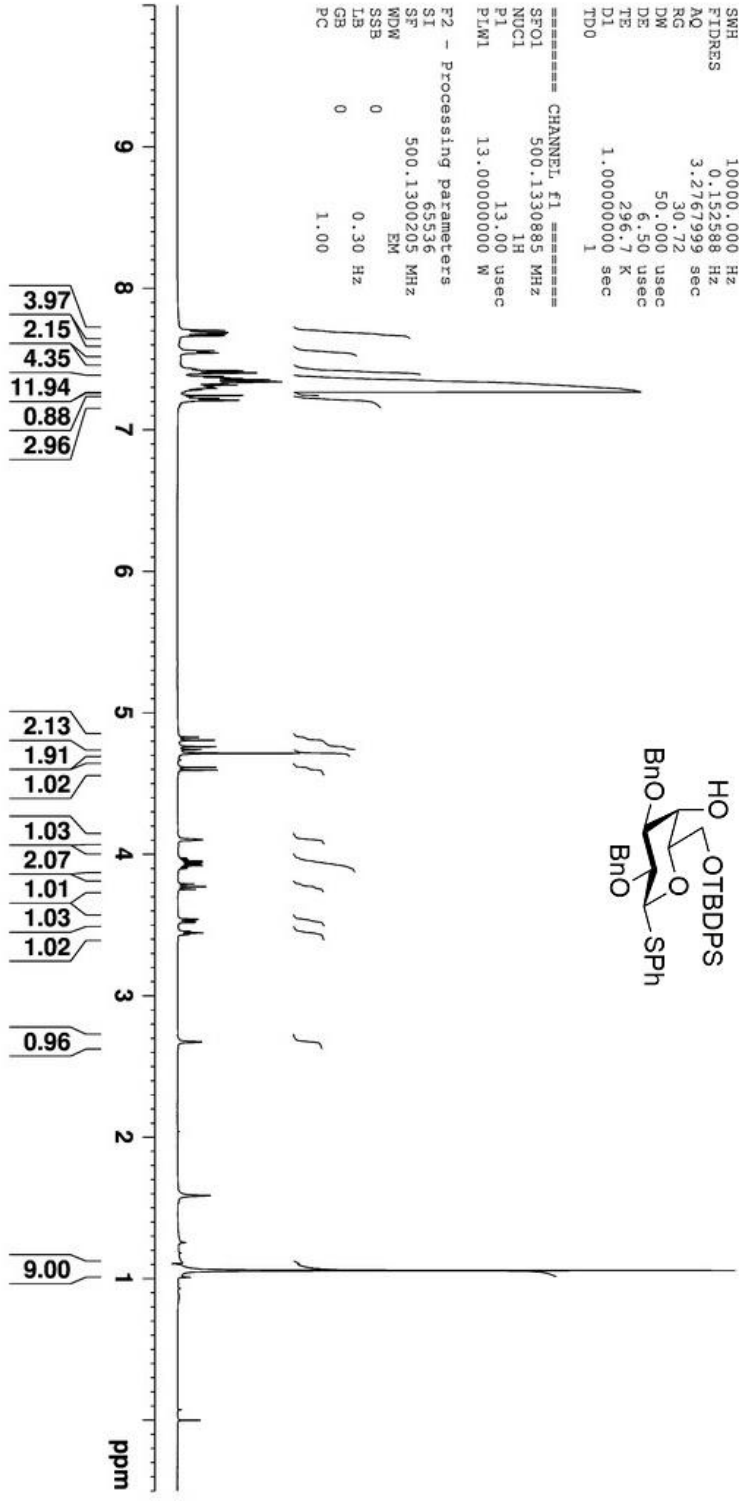

```

Current Data Parameters
NAME      ssk-5-mac-1235a-13c
EXPNO     4
PROCNO    1

F2 - Acquisition Parameters
Date_     20160219
Time      21.12
INSTRUM   spect
PROBHD    5 mm PABBO BB/
PULPROG   zgpg30
TD         65536
SOLVENT   CDCl3
NS         68
DS         0
SWH        29761.904 Hz
FIDRES     0.454131 Hz
AQ         1.1010048 sec
RG         197.27
DM         16.800 usec
DE         8.30 usec
TE         297.4 K
D1         1.00000000 sec
D11        0.03000000 sec
TD0        1

===== CHANNEL f1 =====
SFO1      125.7703637 MHz
NUC1       13C
P1         8.90 usec
P1M1      103.00000000 W

===== CHANNEL f2 =====
SFO2      500.1320005 MHz
NUC2       1H
CPDPRG2   waltz16
PCPD2     80.00 usec
P1M2      13.00000000 W
P1M3      0.34327999 W
P1M4      0.21969999 W

F2 - Processing parameters
SI         32768
SF         125.7577708 MHz
WDW        EM
SSB        0
LB         1.00 Hz
GB         0
PC         1.40
  
```

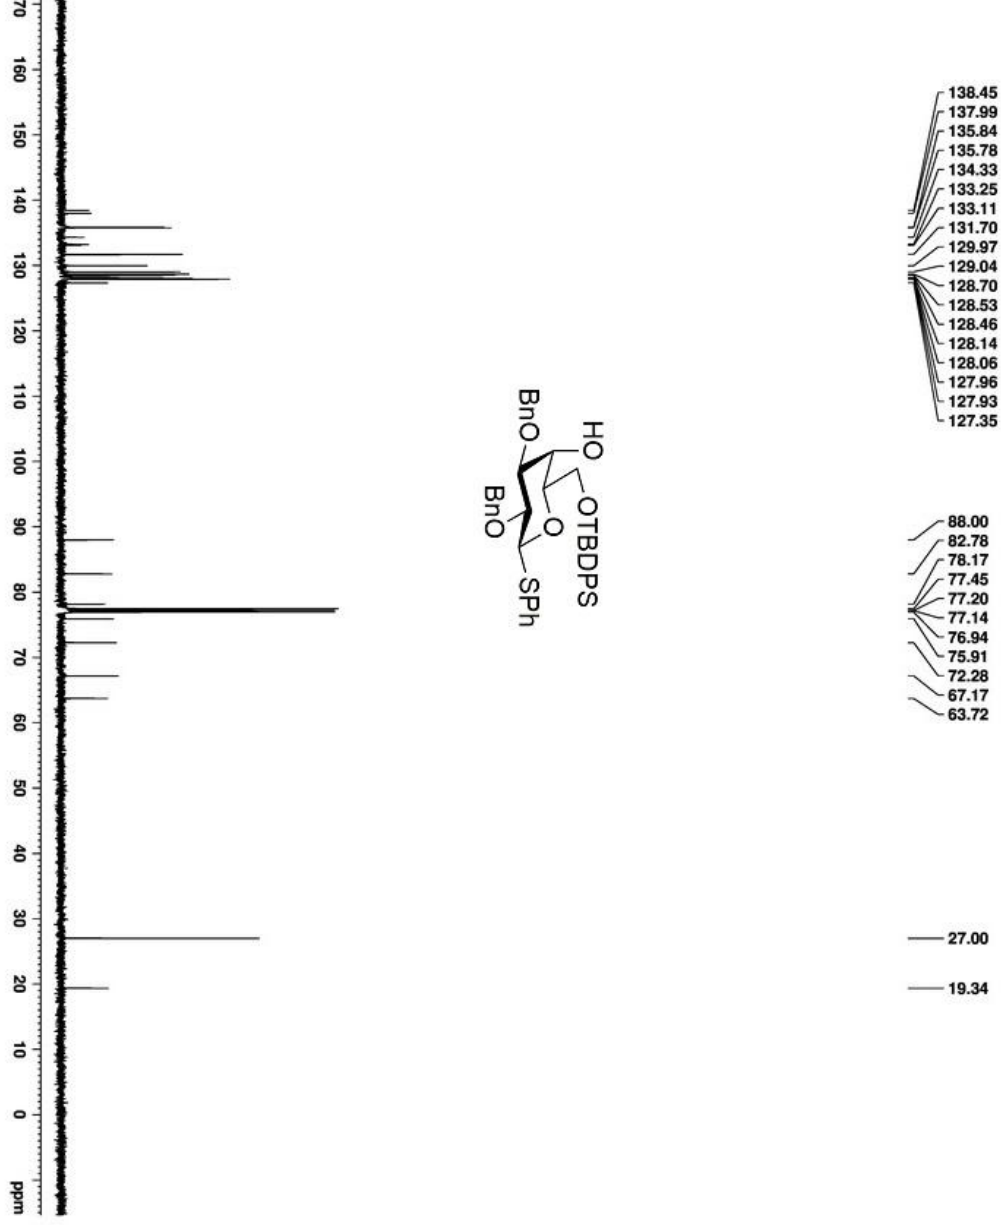

SSK-5-MAC-1239A-1H

Current Data Parameters  
 NAME SSK-5-MAC-1239A-1H  
 EXPNO 5  
 PROCNO 1

F2 - Acquisition Parameters  
 Date\_ 20160219  
 Time 21.18  
 INSTRUM 5 mm PABBO BB/  
 PROBHD 2930  
 PULPROG 65536  
 TD 25  
 SOLVENT CDCl3  
 NS 0  
 DS 0  
 SWH 10000.000 Hz  
 FIDRES 0.152588 Hz  
 AQ 3.276799 sec  
 RG 30.72  
 DW 50.000 usec  
 DE 6.50 usec  
 TE 296.6 K  
 D1 1.00000000 sec  
 TDO 1

===== CHANNEL f1 =====  
 SFO1 500.1330885 MHz  
 NUC1 1H  
 P1 13.00 usec  
 PLW1 13.00000000 W

F2 - Processing parameters  
 SI 65536  
 SF 500.1300218 MHz  
 WDW EM  
 SSB 0  
 LB 0.30 Hz  
 GB 0  
 PC 1.00

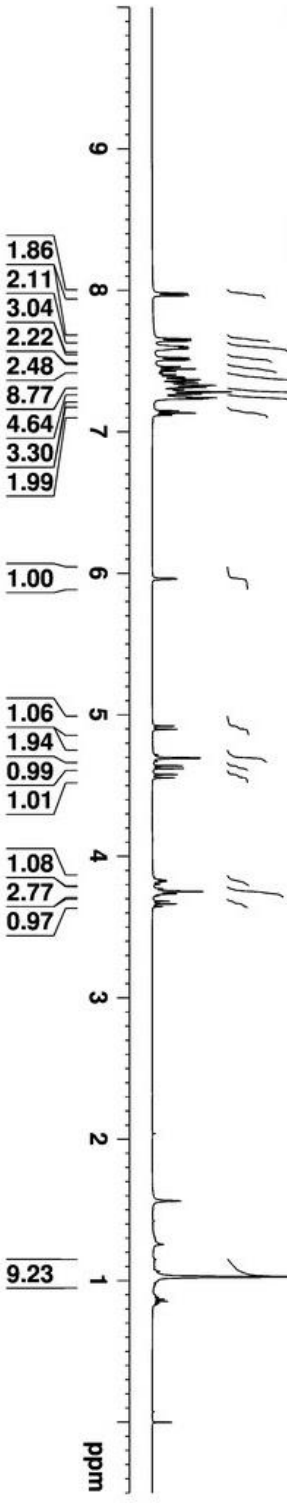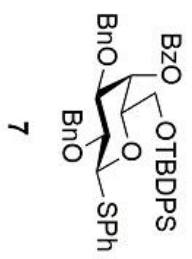

```

Current Data Parameters
NAME      SRK-5-MAC-1239A-13C
EXPNO    1
PROCNO   1

F2 - Acquisition Parameters
Date_    20160219
Time     21.35
INSTRUM  spect
PROBHD   5 mm PABBO BB/
PULPROG  zgpg30
TD       65536
SOLVENT  CDCl3
NS       130
DS       0
SWH      29761.904 Hz
FIDRES   0.454131 Hz
AQ       1.1010048 sec
RG       197.27
DM       16.800 usec
DE       8.39 usec
TE       297.2 K
D1       1.0000000 sec
D11      0.0300000 sec
TD0      1

===== CHANNEL f1 =====
SFO1     125.7703637 MHz
NUC1     13C
P1       8.90 usec
P1M1     103.00000000 W

===== CHANNEL f2 =====
SFO2     500.1320005 MHz
NUC2     1H
CPDPRG2  waltz16
PCPD2    80.00 usec
P1M2     13.00000000 W
P1M3     0.34327999 W
P1M3     0.21969999 W

F2 - Processing parameters
SI       32768
SF       125.7577701 MHz
WDW      EM
SSB      0
LB       1.00 Hz
GB       0
PC       1.40
  
```

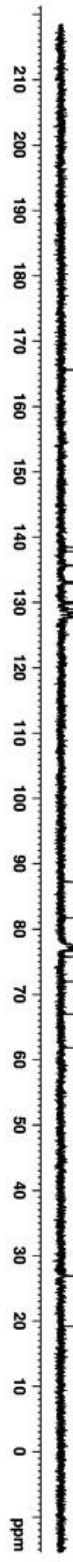

- 165.65
- 138.50
- 137.84
- 135.78
- 135.68
- 133.19
- 132.91
- 130.16
- 129.95
- 129.82
- 129.00
- 128.50
- 128.34
- 127.93
- 127.90
- 127.83
- 127.78
- 87.27
- 81.76
- 77.62
- 77.45
- 77.20
- 76.95
- 76.64
- 75.81
- 72.03
- 67.02
- 61.86
- 26.91
- 19.22

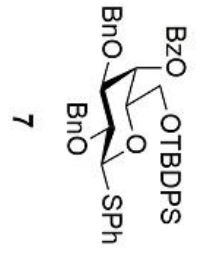

SSK-5-MAC-1239A-COSY

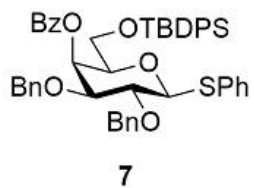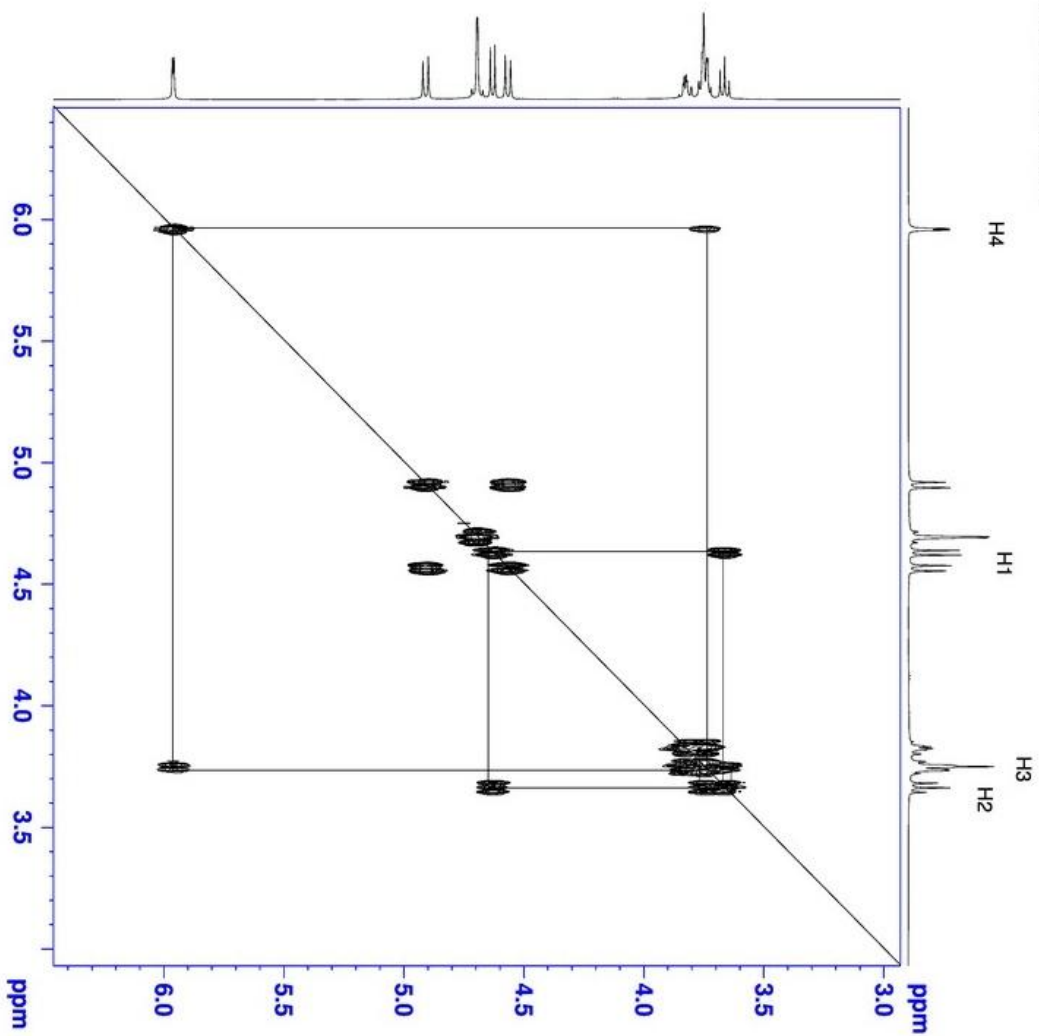

```

Current Data Parameters
NAME       SSK-5-MAC-1239A-COSY
EXPNO     1
PROCNO    1

F2 - Acquisition Parameters
Date_     20160219
Time      21.21
INSTRUM   spect
PROBHD    5 mm PABBO
PULPROG   cosypppgf
TD        2048
SOLVENT   CDCl3
NS        8
DS        2
SFO1      1765.520 Hz
SFO2      0.462078 Hz
AQ        0.5799936 sec
RG        61.42
DE        283.200 usec
TE        300.2
D1        0.00000300 sec
D2        1.000000000 sec
D3        0.030000000 sec
D4        0.000020000 sec
D5        0.000004000 sec
D6        0.000200000 sec
IN0       0.000300000 sec

===== CHANNEL f1 =====
NUC1      1H
P0        13.00 usec
P1        1.00 usec
P17       2500.00 usec
PL1       13.000000000 W
PL10      3.250000000 W

===== GRADIENT CHANNEL =====
GPRM[1]  SMO210.100 %
GR1       1.00 usec
P16       1000.00 usec

F1 - Acquisition parameters
SI        58
SF01      500.1324 MHz
SFO2      0.462078 MHz
SM        30.4238 MHz
SW        3.530 ppm
F2CODE    OP

F2 - Processing parameters
SI        1024
SF        500.1300218 MHz
WDW       COSYMS
SSB       0 Hz
LB        0 Hz
GB        0
PC        1.40

F1 - Processing parameters
SI        1024
SF        500.1300218 MHz
WDW       COSYMS
SSB       0 Hz
LB        0 Hz
GB        0
PC        1.40
    
```



SSK-5-MAC-1240A-1H

Current Data Parameters  
 NAME SSK-5-MAC-1240A-1H  
 EXPNO 7  
 PROCNO 1

F2 - Acquisition Parameters  
 Date\_ 20160124  
 Time\_ 10.53

INSTRUM 5 mm PABBO BB/  
 PROBHD 2930  
 PULPROG 65536  
 TD 28  
 SOLVENT CDCl3

DS 2  
 SWH 10000.000 Hz  
 FIDRES 0.152588 Hz  
 AQ 3.276799 sec  
 RG 30.72  
 DW 50.000 usec  
 DE 6.50 usec  
 TE 296.5 K  
 D1 1.00000000 sec  
 TDO 1

===== CHANNEL f1 =====  
 SFO1 500.1330885 MHz  
 NUC1 1H  
 P1 13.00 usec  
 PLW1 13.00000000 W

F2 - Processing parameters  
 SI 65536  
 SF 500.1300294 MHz  
 WDW EM  
 SSB 0  
 GB 0.30 Hz  
 PC 1.00

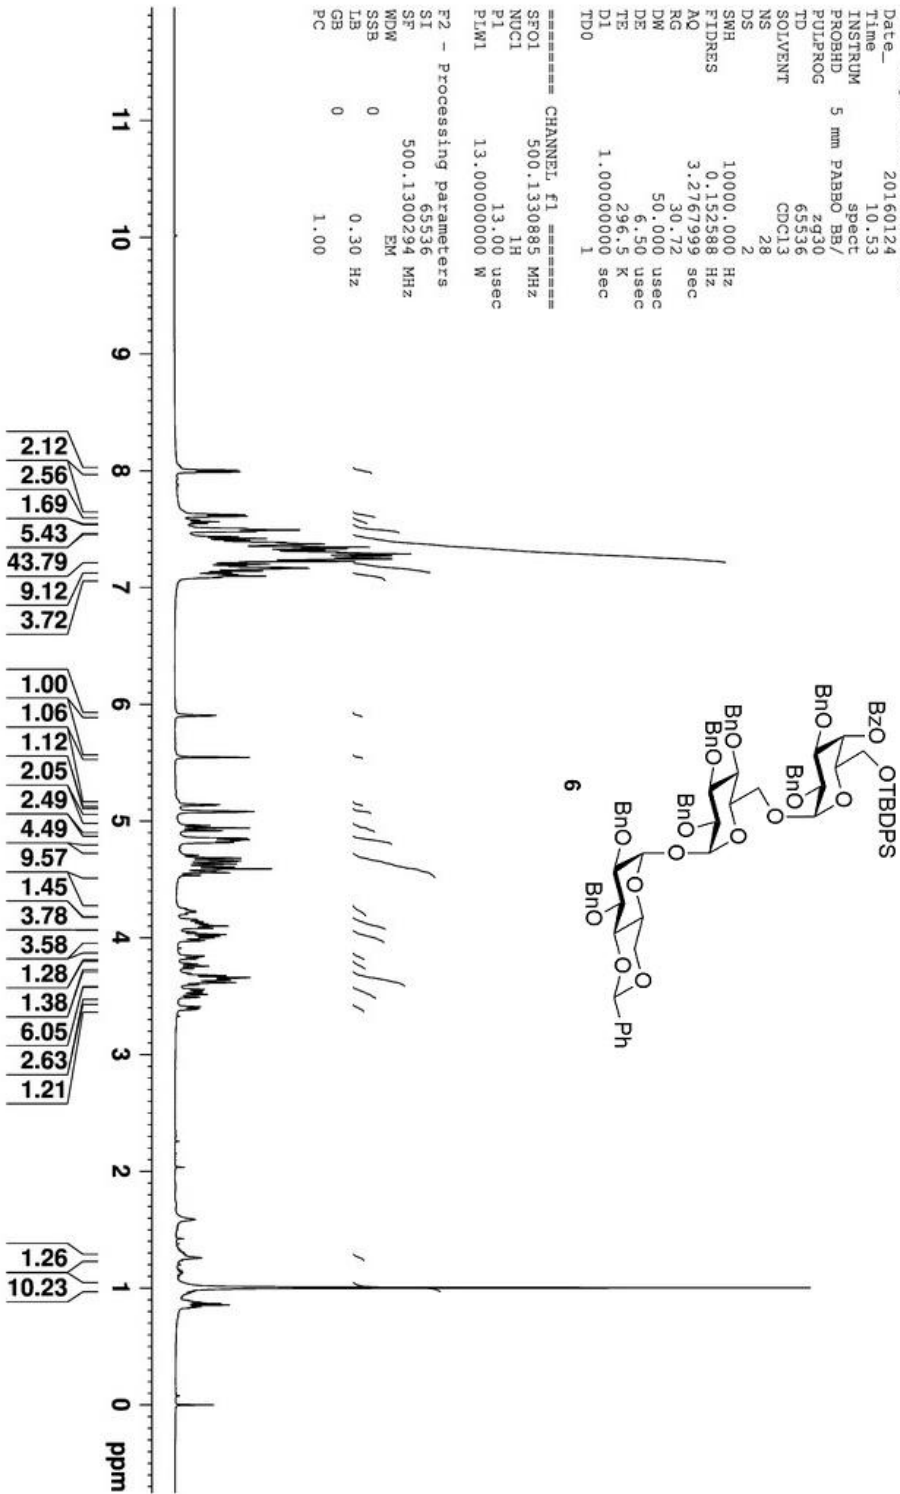

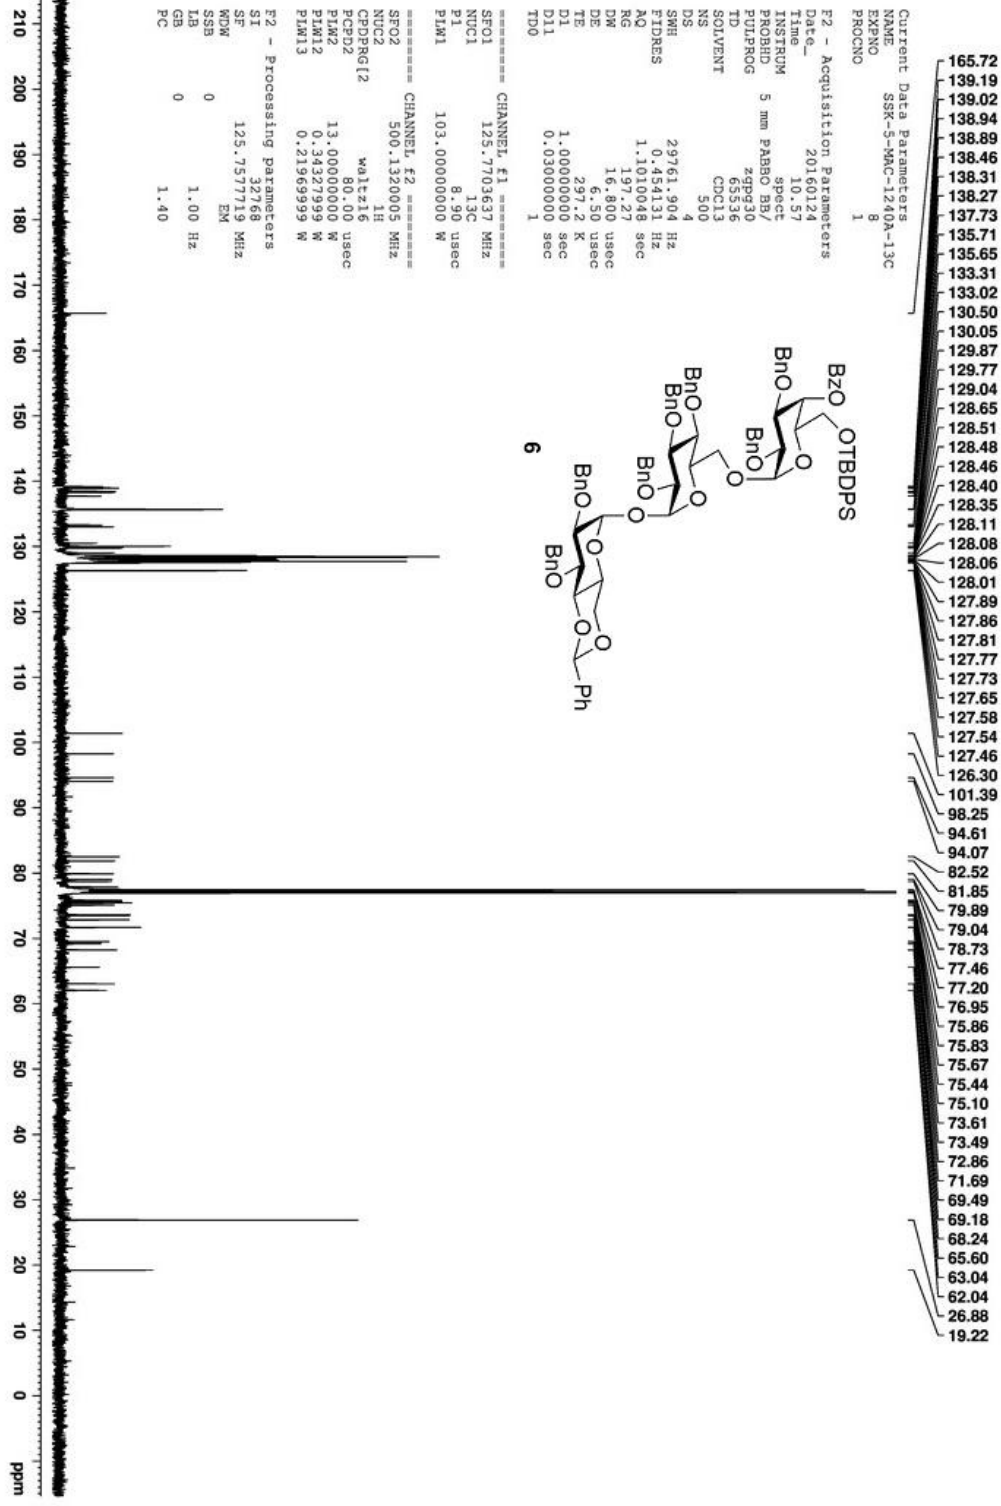

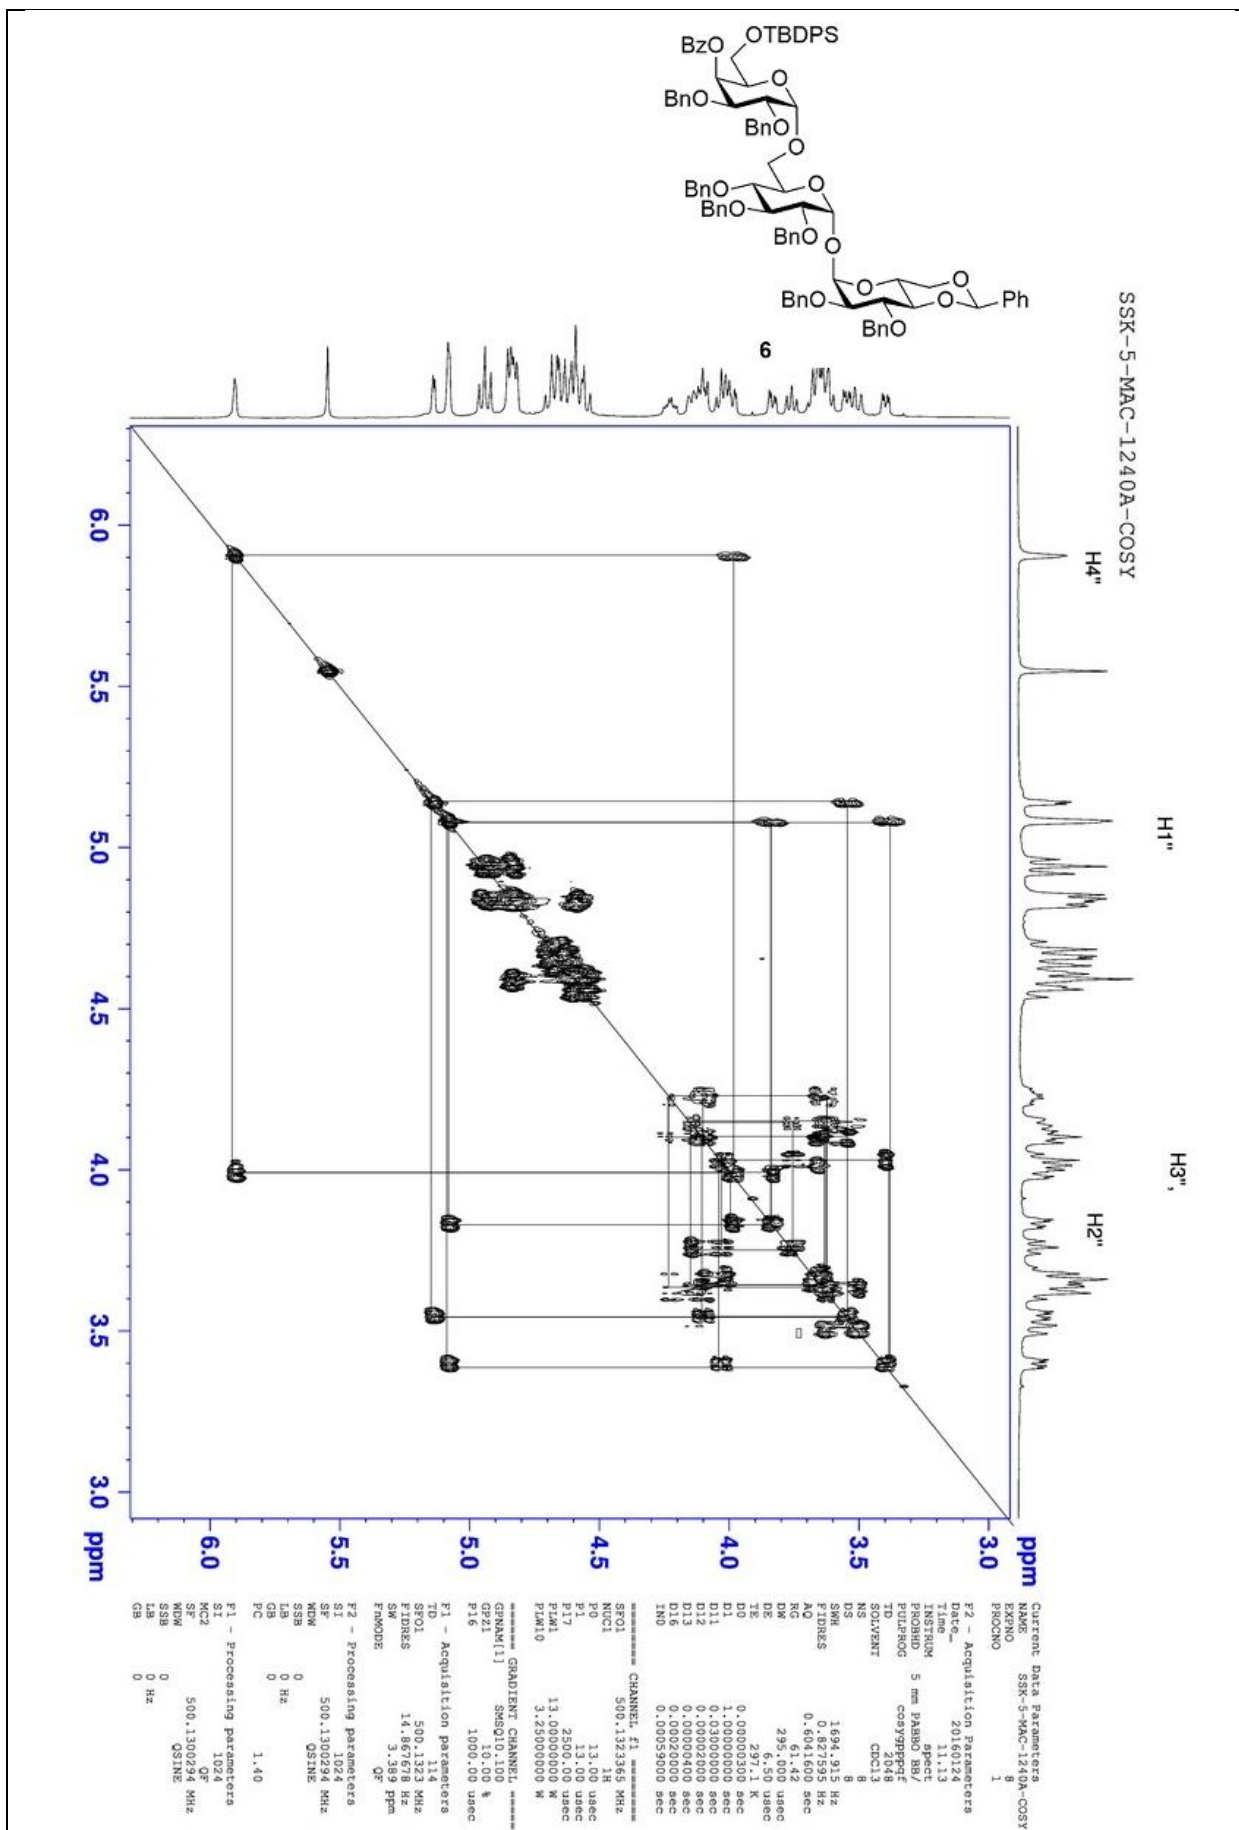



SSK-5-MAC-1242-1H

Current Data Parameters  
 NAME SSK-5-MAC-1242-1H  
 EXPNO 1  
 PROCNO 1

F2 - Acquisition Parameters

Date\_ 20160127  
 Time\_ 10.03  
 INSTRUM 5 mm PABBO BB/  
 PROBHD spect  
 PULPROG zg30  
 TD 65536  
 SOLVENT CDCl3  
 NS 32  
 DS 2  
 SWH 10000.000 Hz  
 FIDRES 0.152588 Hz  
 AQ 3.2767999 sec  
 RG 30.72  
 DW 50.000 usec  
 DE 6.50 usec  
 TE 294.6 K  
 D1 1.00000000 sec  
 TDO 1

===== CHANNEL f1 =====  
 SFO1 500.1330885 MHz  
 NUC1 1H  
 P1 13.00 usec  
 PLW1 13.00000000 W

F2 - Processing parameters  
 SI 65536  
 SF 500.1300309 MHz  
 WDW EM  
 SSB EM  
 LB 0 Hz  
 GB 0  
 PC 1.00

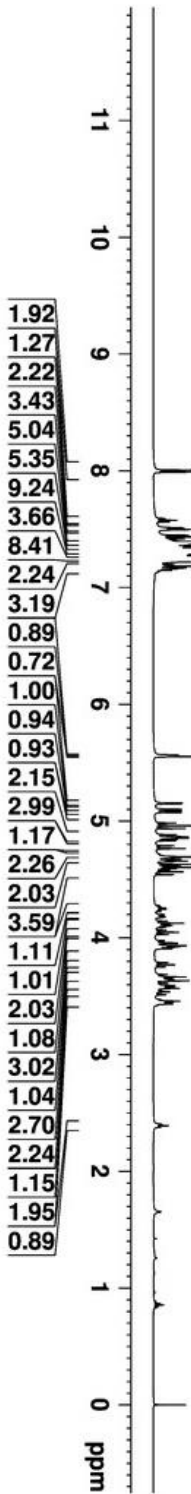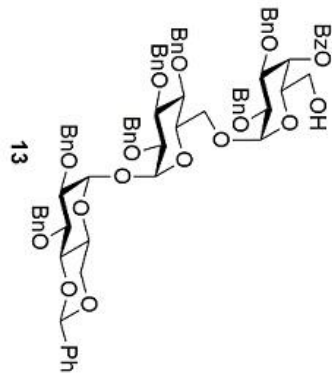

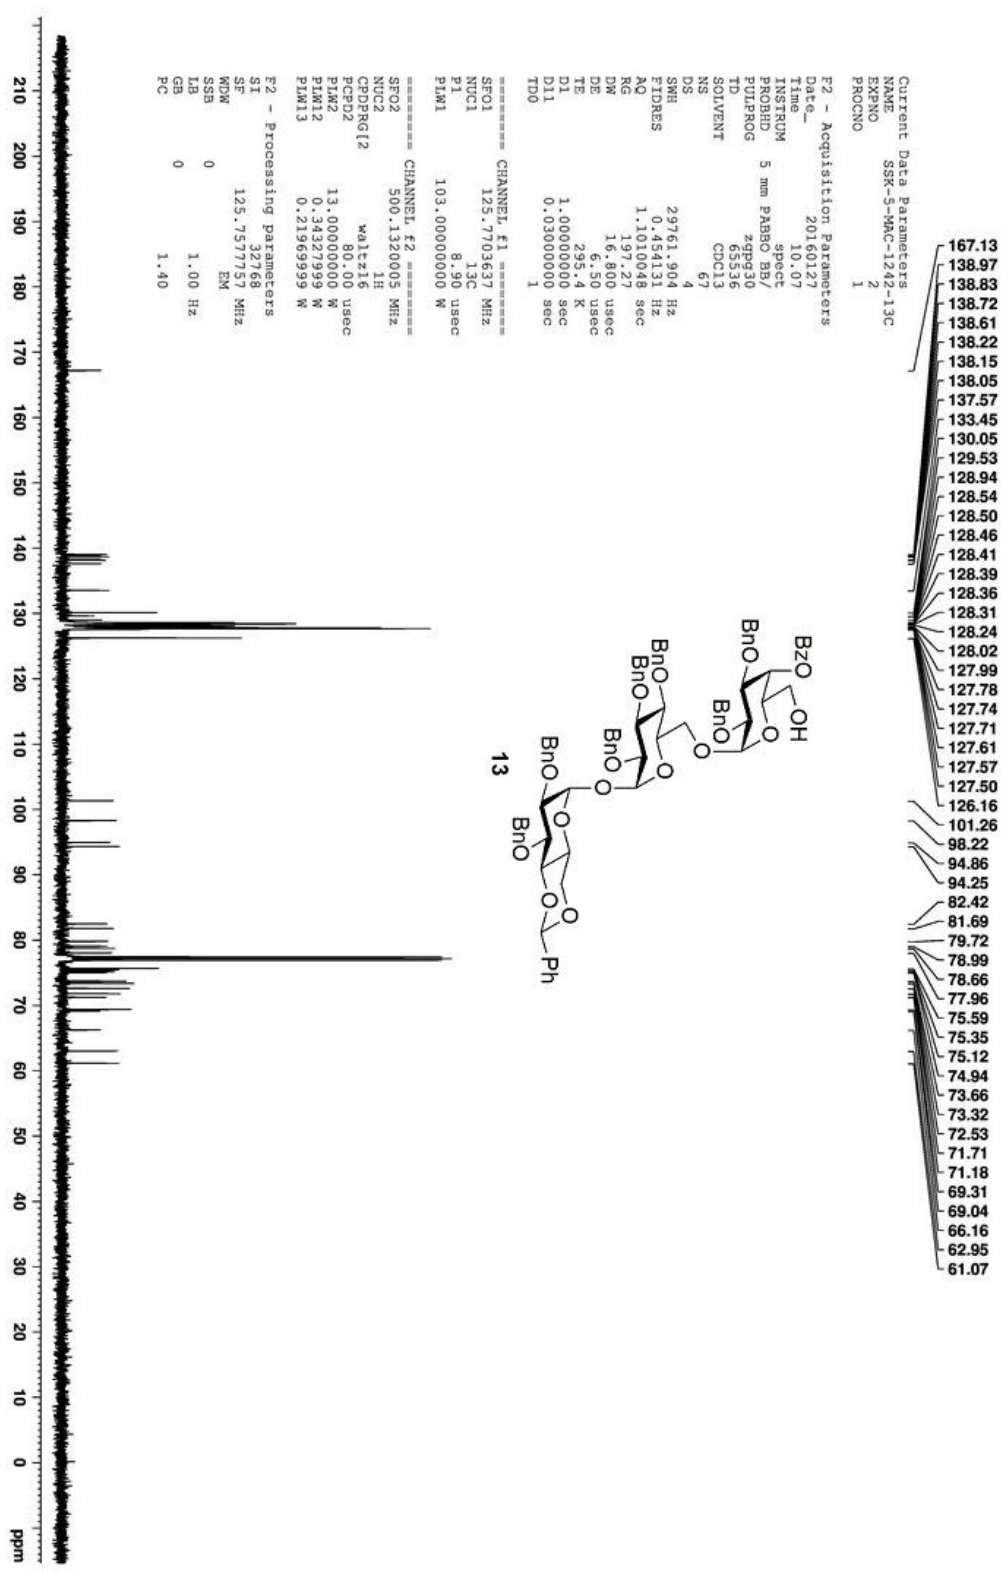

SSK-5-MAC-1244-1H

Current Data Parameters  
 NAME SSK-5-MAC-1244-1H  
 EXPNO 1  
 PROCNO 1

F2 - Acquisition Parameters

Date\_ 20160129  
 Time 9.25  
 INSTRUM spect  
 PROBHD 5 mm PABBO BB/  
 PULPROG zg30  
 TD 65536  
 SOLVENT CDCl3  
 NS 50  
 DS 2  
 SSB 10000.000 Hz  
 FIDRES 0.152588 Hz  
 AQ 3.2767999 sec  
 RG 30.72  
 DW 50.000 usec  
 DE 6.50 usec  
 TE 295.1 K  
 D1 1.00000000 sec  
 TDO 1

==== CHANNEL f1 =====  
 SFO1 500.1330885 MHz  
 NUC1 1H  
 P1 13.00 usec  
 PLW1 13.00000000 W

F2 - Processing parameters  
 SI 65536  
 SF 500.1300120 MHz  
 WDW EM  
 SSB 0  
 LB 0.30 Hz  
 GB 0  
 PC 1.00

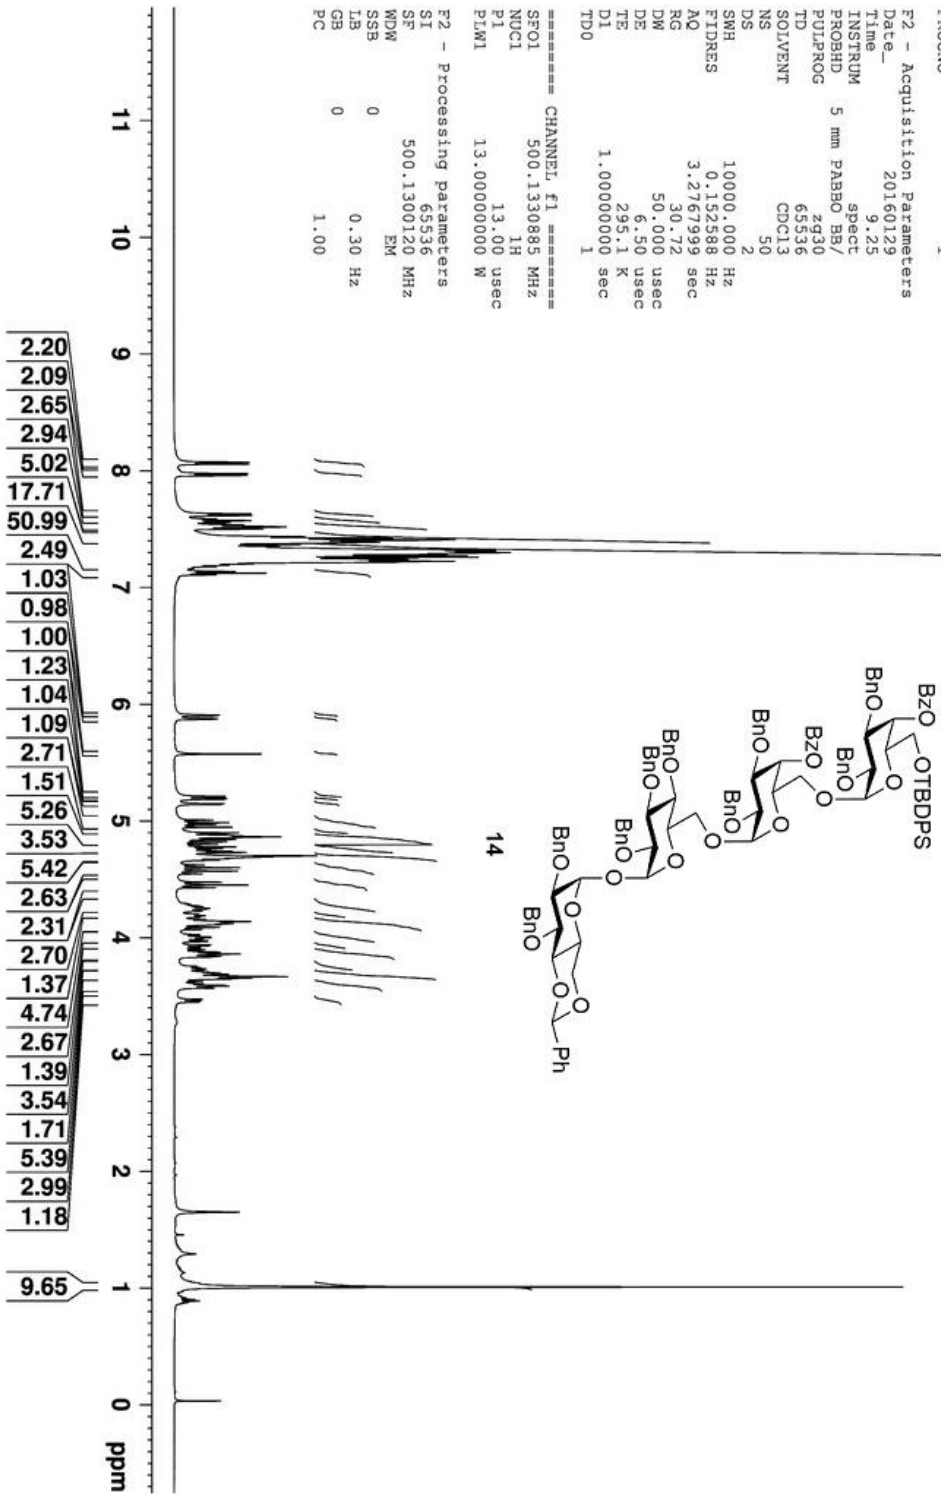

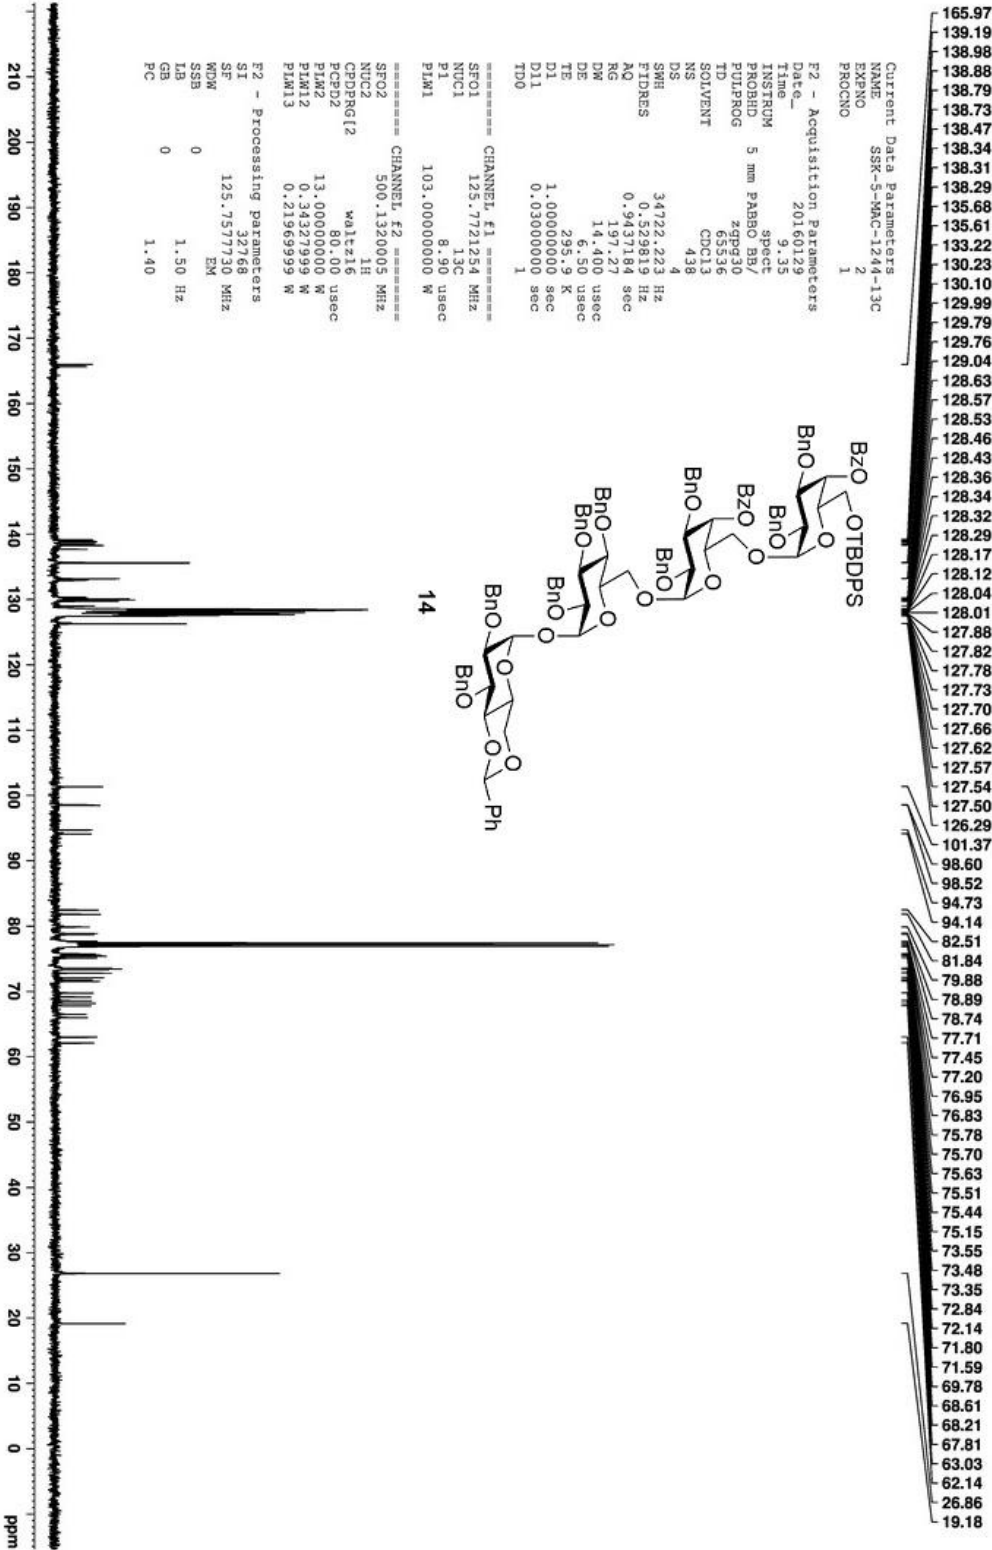



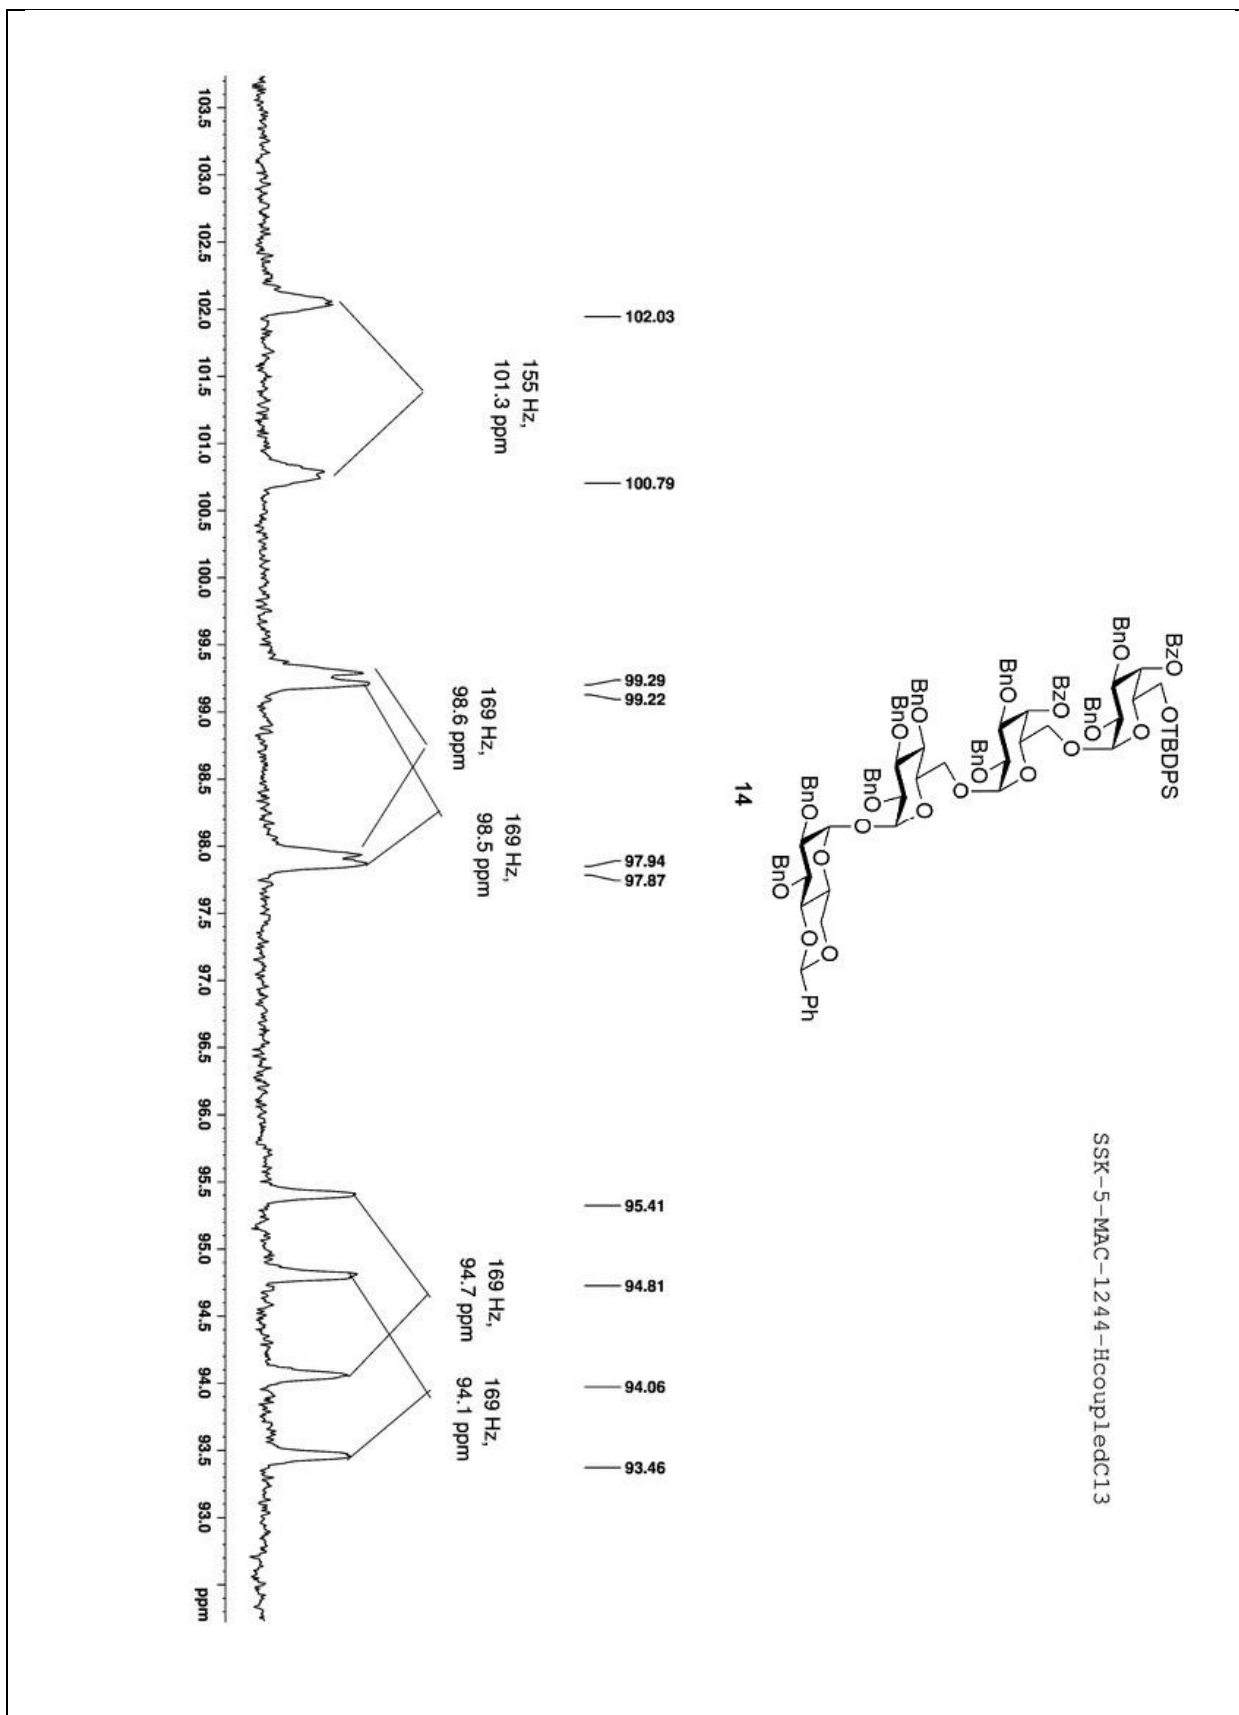



SSK-5-MAC-1252-1H

Current Data Parameters  
 NAME SSK-5-MAC-1252-1H  
 EXPNO 6  
 PROCNO 1

F2 - Acquisition Parameters

Date\_ 20160209  
 Time 18.39  
 INSTRUM spect  
 PROBHD 5 mm PABBO BB/  
 PULPROG zg30  
 TD 65536  
 SOLVENT CDCl3  
 NS 16  
 DS 2  
 SSB 10000.000 Hz  
 FIDRES 0.152588 Hz  
 AQ 3.276799 sec  
 RG 30.72  
 DW 50.000 usec  
 DE 6.50 usec  
 TE 296.9 K  
 D1 1.00000000 sec  
 TDO 1

===== CHANNEL f1 =====  
 SFO1 500.1330885 MHz  
 NUC1 1H  
 P1 13.00 usec  
 PLW1 13.000000000 W

F2 - Processing parameters  
 SI 65536  
 SF 500.1299996 MHz  
 WDW EM  
 SSB 0  
 LB 0.30 Hz  
 GB 0  
 PC 1.00

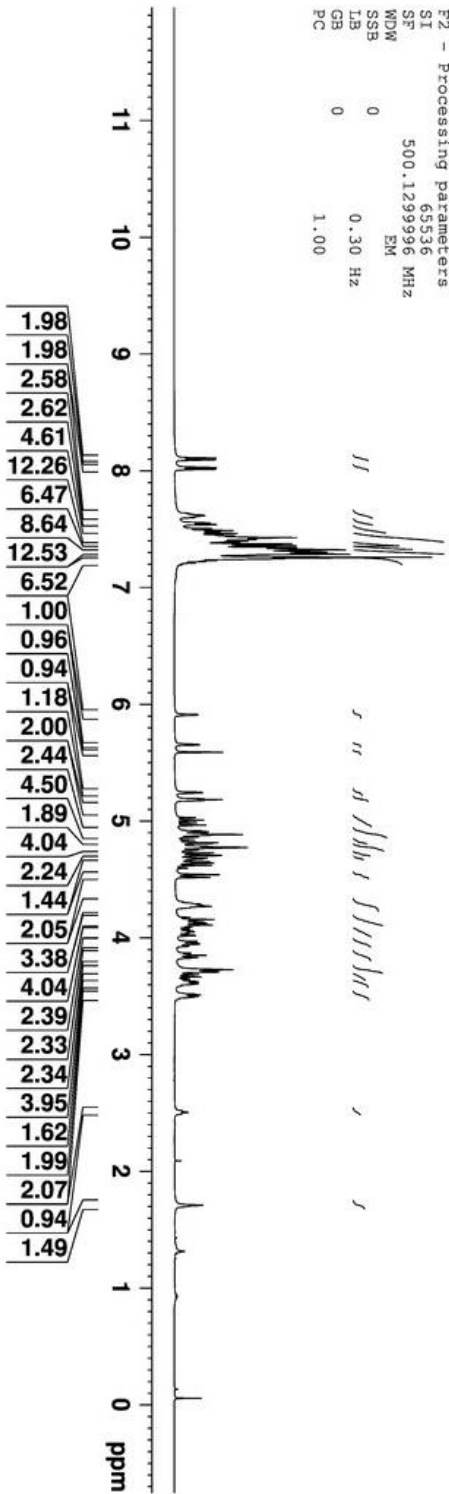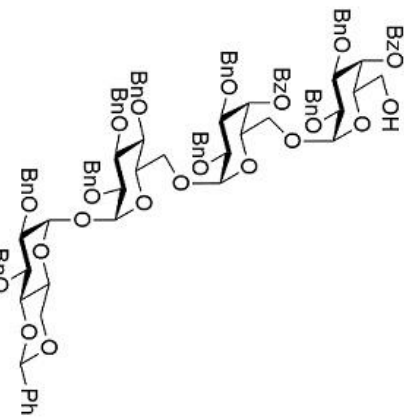



NAME SSK-5-MAC-1253-1H  
 EXPNO 2  
 PROCNO 1  
 Date\_ 20160211  
 Time 10.03  
 INSTRUM spect  
 PROBD 5 mm SEI 1H/D-  
 PULPROG zg30  
 TD 54274  
 SOLVENT CDCl3  
 NS 39  
 DS 0  
 SMH 8223.685 Hz  
 FIDRES 0.131522 Hz  
 AQ 3.2999091 sec  
 RG 32  
 DW 60.800 usec  
 DE 6.50 usec  
 TE 293.6 K  
 D1 1.00000000 sec  
 TD0 1

===== CHANNEL f1 =====  
 NUCL1 1H  
 P1 6.75 usec  
 PL1 -3.00 dB  
 PL1W 16.73965454 W  
 SFO1 400.1324710 MHz  
 SI 32768  
 SF 400.1300095 MHz  
 WDM 0  
 SSB 0  
 GB 0  
 PC 1.00

SSK-5-MAC-1253-1H

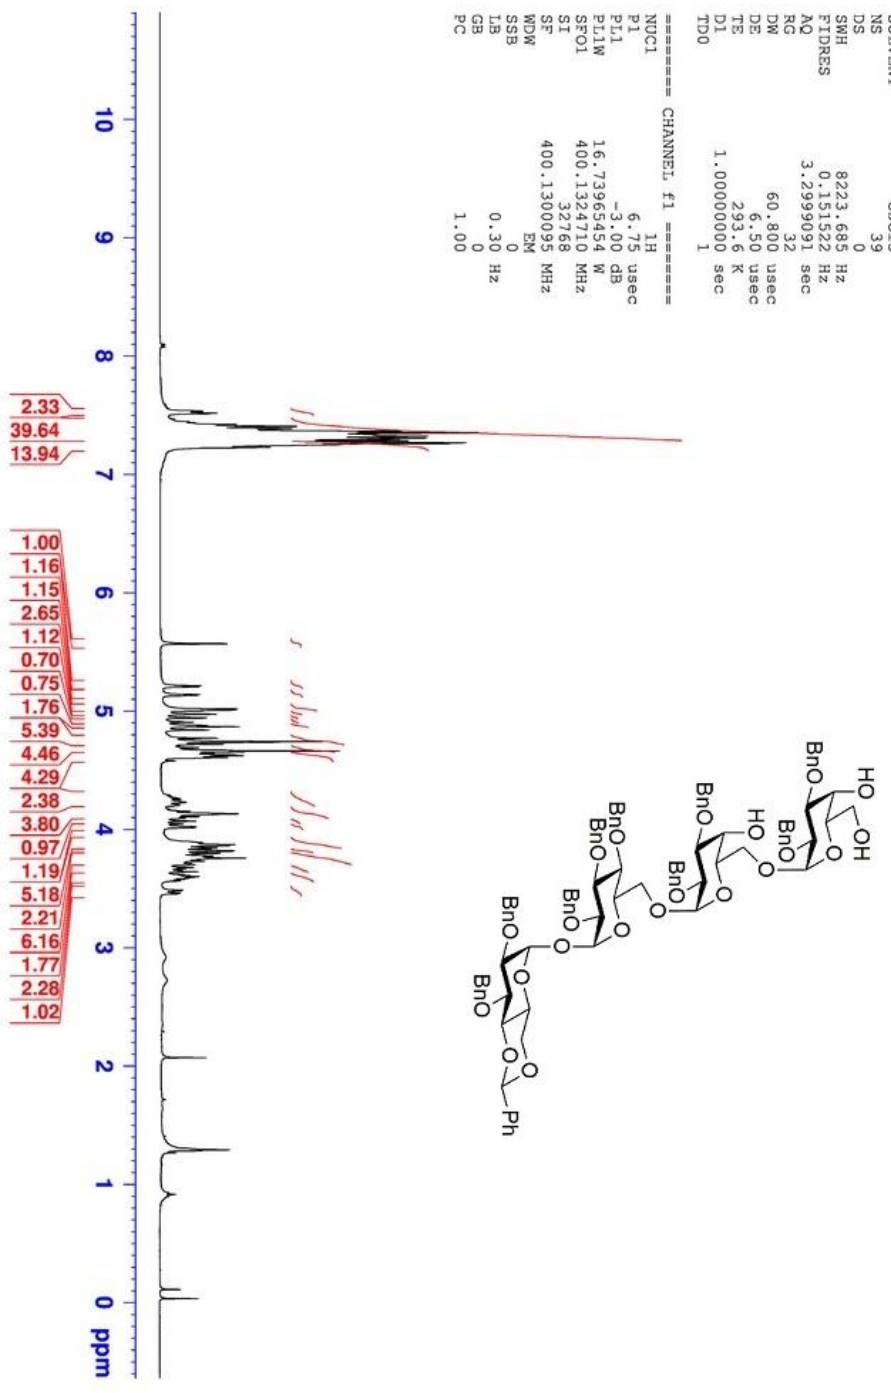

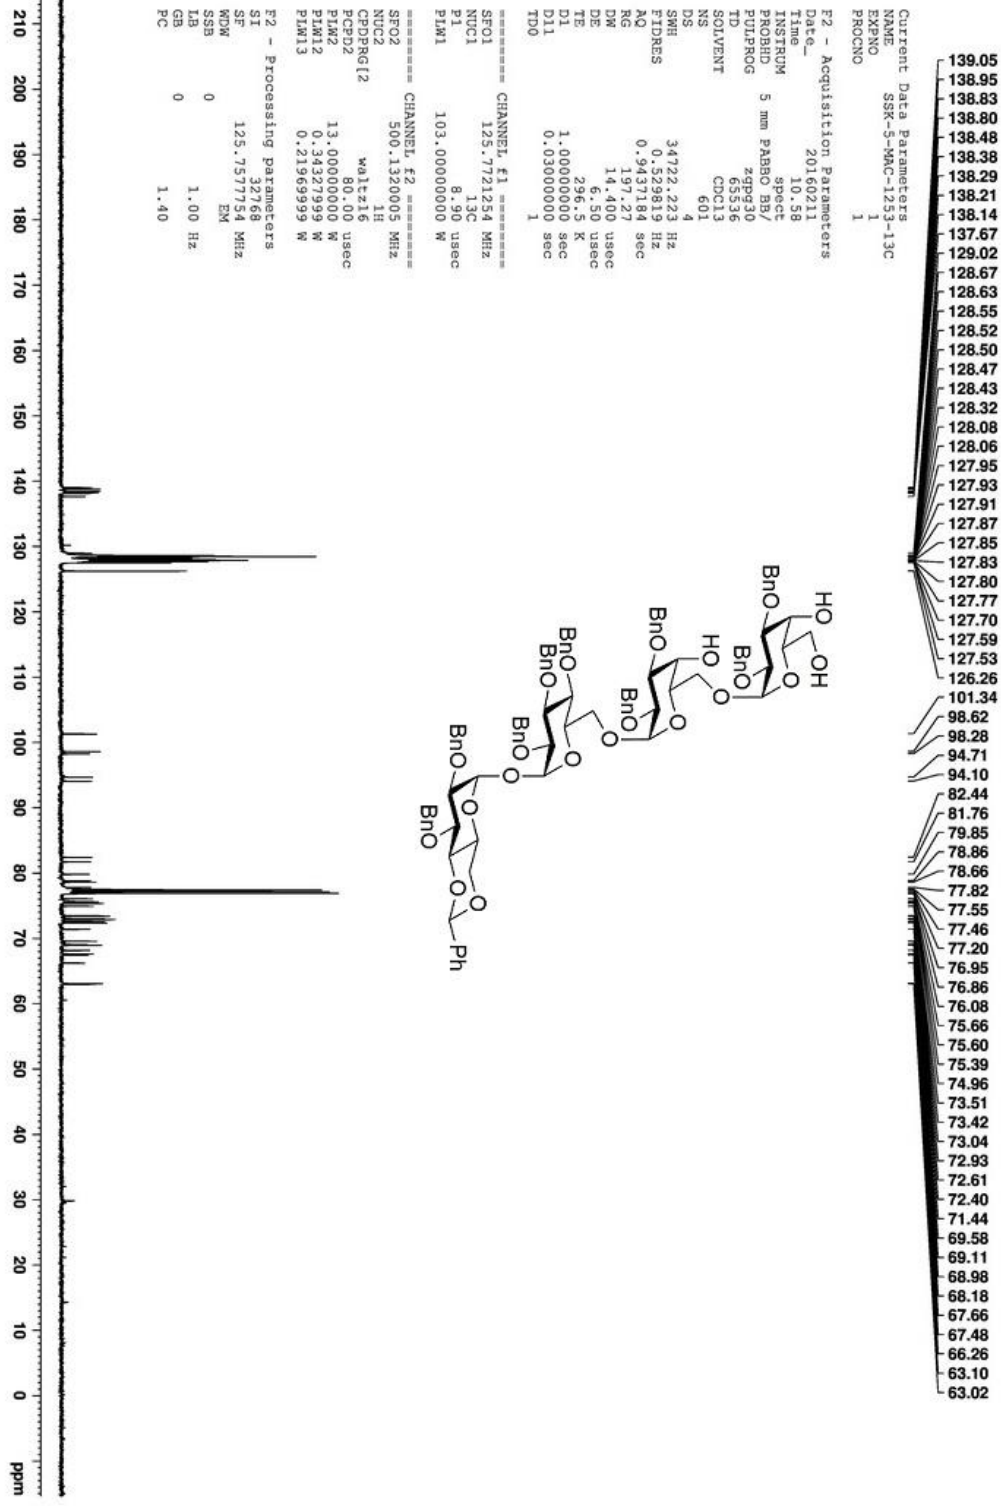

SSK-5-MAC-1247D-1H

Current Data Parameters  
 NAME SSK-5-MAC-1247D-1H  
 EXPNO 15  
 PROCNO 1

F2 - Acquisition Parameters  
 Date\_ 20160311  
 Time 17.37

INSTRUM 5 mm PABBO BB/  
 PROBHD zg30  
 PULPROG 65536  
 TD 50  
 SOLVENT MeOD  
 NS 50  
 DS 0  
 SWH 10000.000 Hz  
 FIDRES 0.152588 Hz  
 AQ 3.276799 sec  
 RG 30.72  
 DW 50.000 usec  
 DE 6.50 usec  
 TE 297.2 K  
 D1 1.00000000 sec  
 TD0 1

==== CHANNEL f1 =====  
 SFO1 500.1330885 MHz  
 NUC1 1H  
 P1 13.00 usec  
 P1M1 13.00000000 W

F2 - Processing parameters  
 SI 65536  
 SF 500.1300000 MHz  
 WDW EM  
 SSB 0  
 GB 0  
 PC 1.00

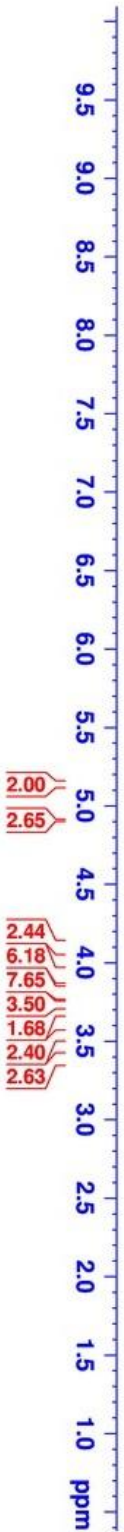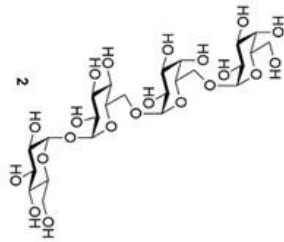

Current Data Parameters  
 NAME SR-5-MAC-1247b-13C  
 EXPNO 7  
 PROCNO 1

F2 - Acquisition Parameters

Date\_ 20160212  
 Time 17.49  
 INSTRUM spect  
 PROBHD 5 mm PABBO BB/  
 PULPROG zgpg30  
 TD 65536  
 SOLVENT D2O  
 NS 459  
 DS 4  
 SWH 29761.904 Hz  
 FIDRES 0.454131 Hz  
 AQ 1.1010048 sec  
 RG 197.27  
 DM 16.800 usec  
 DE 8.30 usec  
 TE 296.8 K  
 D1 1.0000000 sec  
 D11 0.0300000 sec  
 TD0 1

CHANNEL f1

SFO1 125.7703637 MHz  
 NUC1 13C  
 P1 8.90 usec  
 P1M1 103.00000000 W

CHANNEL f2

SFO2 500.1320005 MHz  
 NUC2 1H  
 CPDPRG2 waltz16  
 PCPD2 80.00 usec  
 P1M2 13.00000000 W  
 P1M12 0.34327999 W  
 P1M13 0.21969999 W

F2 - Processing parameters

SI 32768  
 SF 125.7577890 MHz  
 SSB EM  
 LB 1.00 Hz  
 GB 0  
 PC 1.40

- 97.99
- 97.67
- 93.43
- 93.34
- 72.84
- 72.57
- 72.22
- 70.98
- 70.43
- 69.78
- 69.68
- 69.52
- 69.38
- 69.26
- 68.77
- 68.39
- 68.29
- 66.46
- 65.34
- 61.17
- 60.52
- 48.93

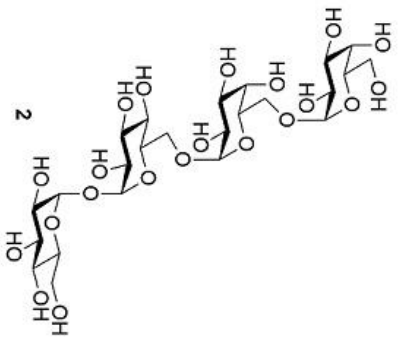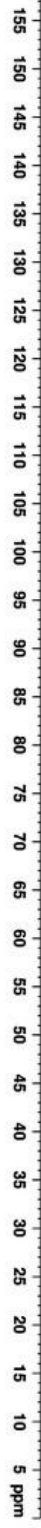



SSK-5-mac-1247-hsqc

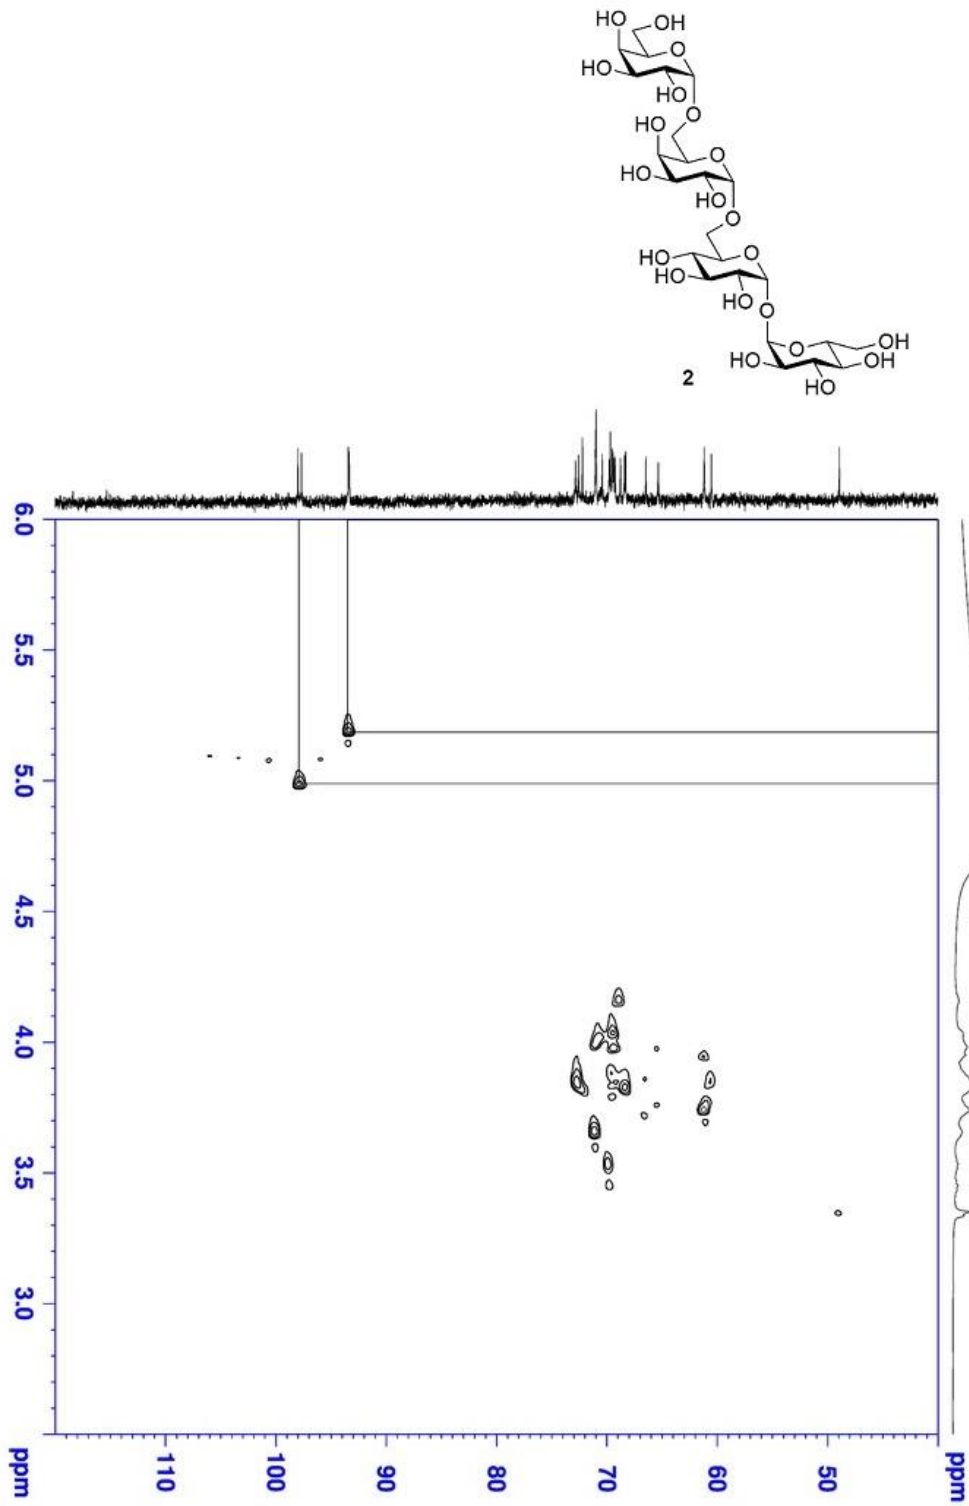

```

===== CHANNEL f2 =====
NUC1 13C
P1 13.00000000 M
===== CHANNEL f1 =====
NUC1 1H
P1 1.00000000 M
=====
NAME SSK-5-mac-1247-hsqc
PROCNO 1
PROBHD 5mm
PULPROG zgpg30
TD 65536
SFO 500.136181
AQ 0.1633415
RG 327.5
WDW EM
SSB 0
GB 0
PC 1.40
DC 0
SC 0
=====
F2 - Acquisition parameters
Date_ 20180218
Time 12.27
INSTRUM spect
PROBHD 5mm
PULPROG zgpg30
PCPDPRG2 fsgdpr14pr2.2
SOLVENT D2O
=====
F1 - Processing parameters
SI 327.5
SF 500.136181 MHz
WDW EM
SSB 0
GB 0
PC 1.40
DC 0
SC 0
=====
F2 - Processing parameters
SI 327.5
SF 500.136181 MHz
WDW EM
SSB 0
GB 0
PC 1.40
DC 0
SC 0
=====
F1 - Processing parameters
SI 327.5
SF 500.136181 MHz
WDW EM
SSB 0
GB 0
PC 1.40
DC 0
SC 0
=====
NAME SSK-5-mac-1247-hsqc
PROCNO 1
PROBHD 5mm
PULPROG zgpg30
TD 65536
SFO 500.136181
AQ 0.1633415
RG 327.5
WDW EM
SSB 0
GB 0
PC 1.40
DC 0
SC 0
=====

```

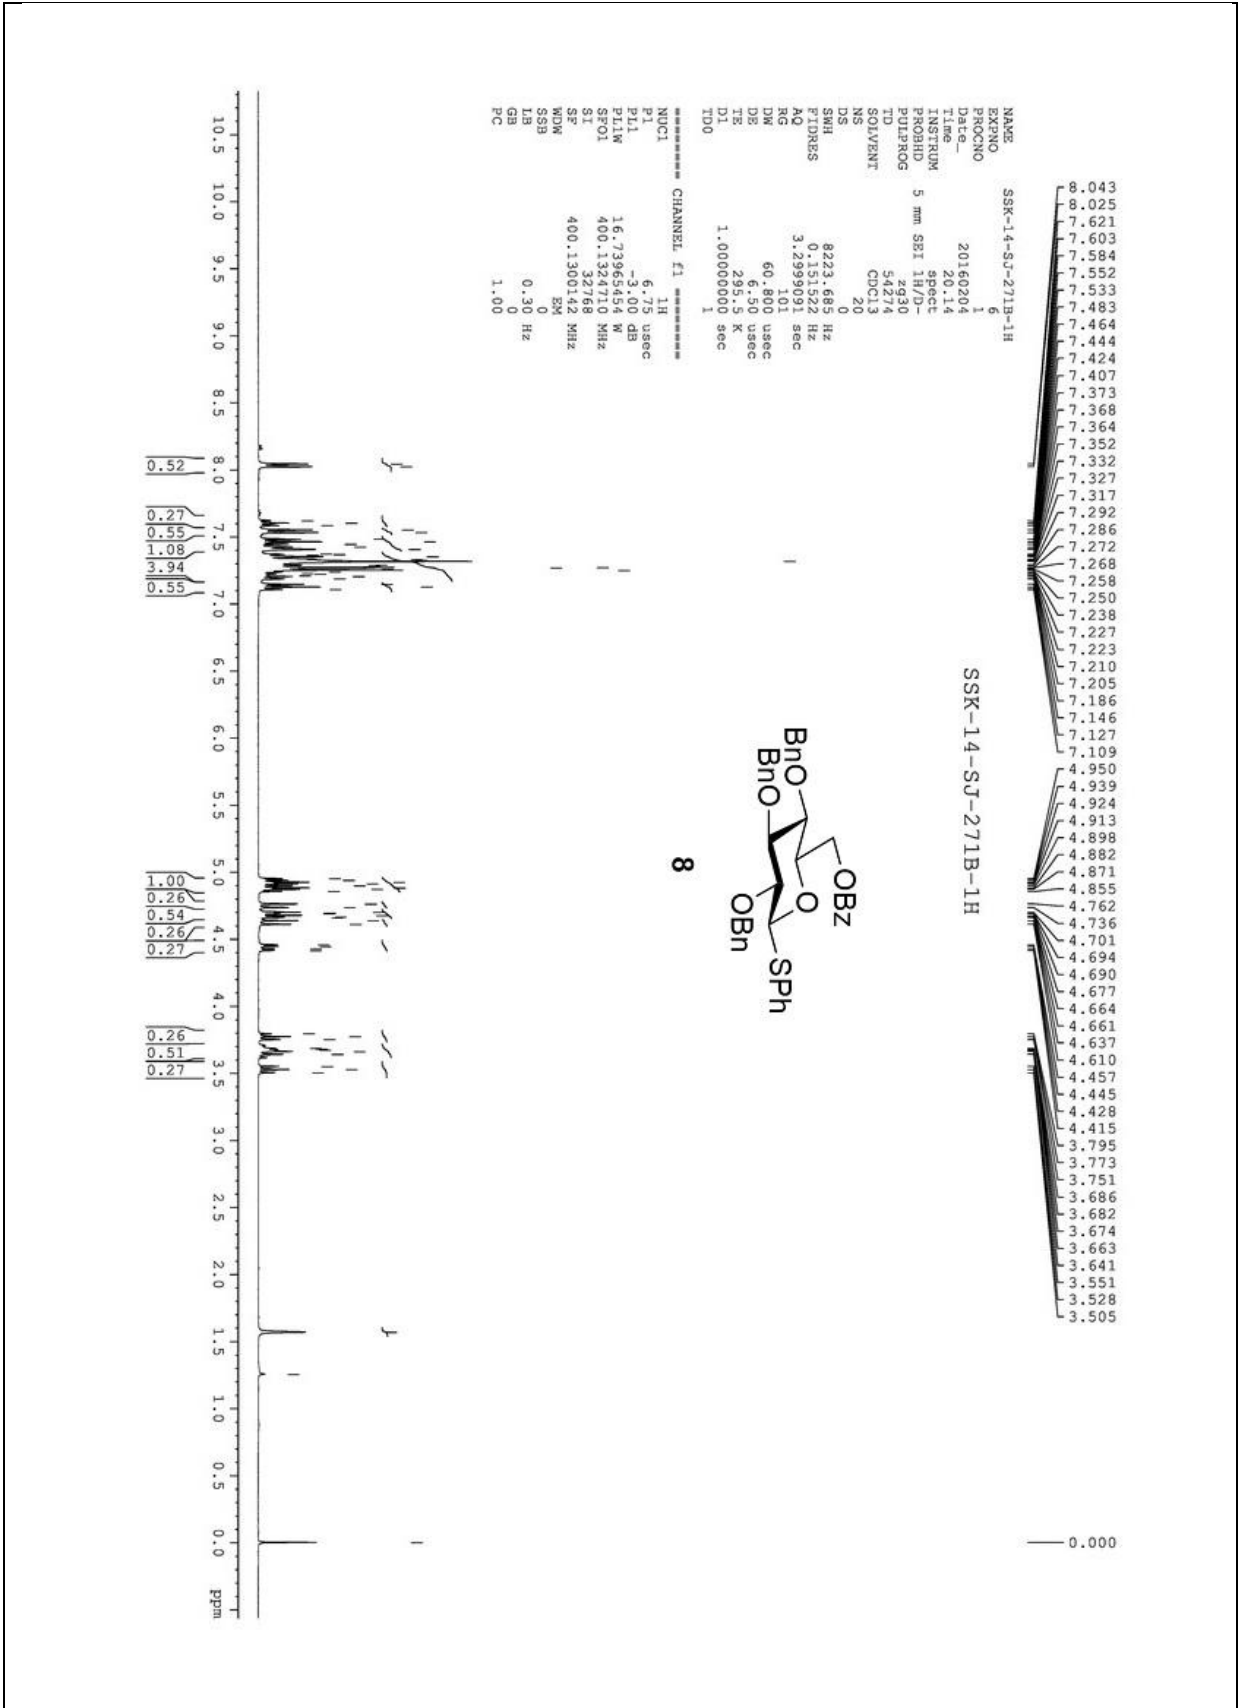

```

Current Data Parameters
NAME      SRK-14-Sr-271-13C
EXPNO     7
PROCNO    1

F2 - Acquisition Parameters
Date_     20160115
Time      17.34
INSTRUM   spect
PROBHD    5 mm PABBO BB/
PULPROG   zgpg30
TD         65536
SOLVENT   CDCl3
NS         134
DS         0
SWH        29761.904 Hz
FIDRES     0.454131 Hz
AQ         1.1010048 sec
RG         197.27
RW         16.800 usec
DE         8.30 usec
TE         297.2 K
D1         1.00000000 sec
D11        0.03000000 sec
TD0        1

===== CHANNEL f1 =====
SFO1      125.7703637 MHz
NUC1      13C
P1        8.90 usec
P1M1     103.00000000 W

===== CHANNEL f2 =====
SFO2      500.1320005 MHz
NUC2      1H
CPDPRG12  waltz16
PCPD2     80.00 usec
P1M2     13.00000000 W
P1M12    0.34327999 W
P1M13    0.21969999 W

F2 - Processing parameters
SI        32768
SF        125.7577722 MHz
WDW       EM
SSB       0
LB        1.00 Hz
GB        0
PC        1.40
  
```

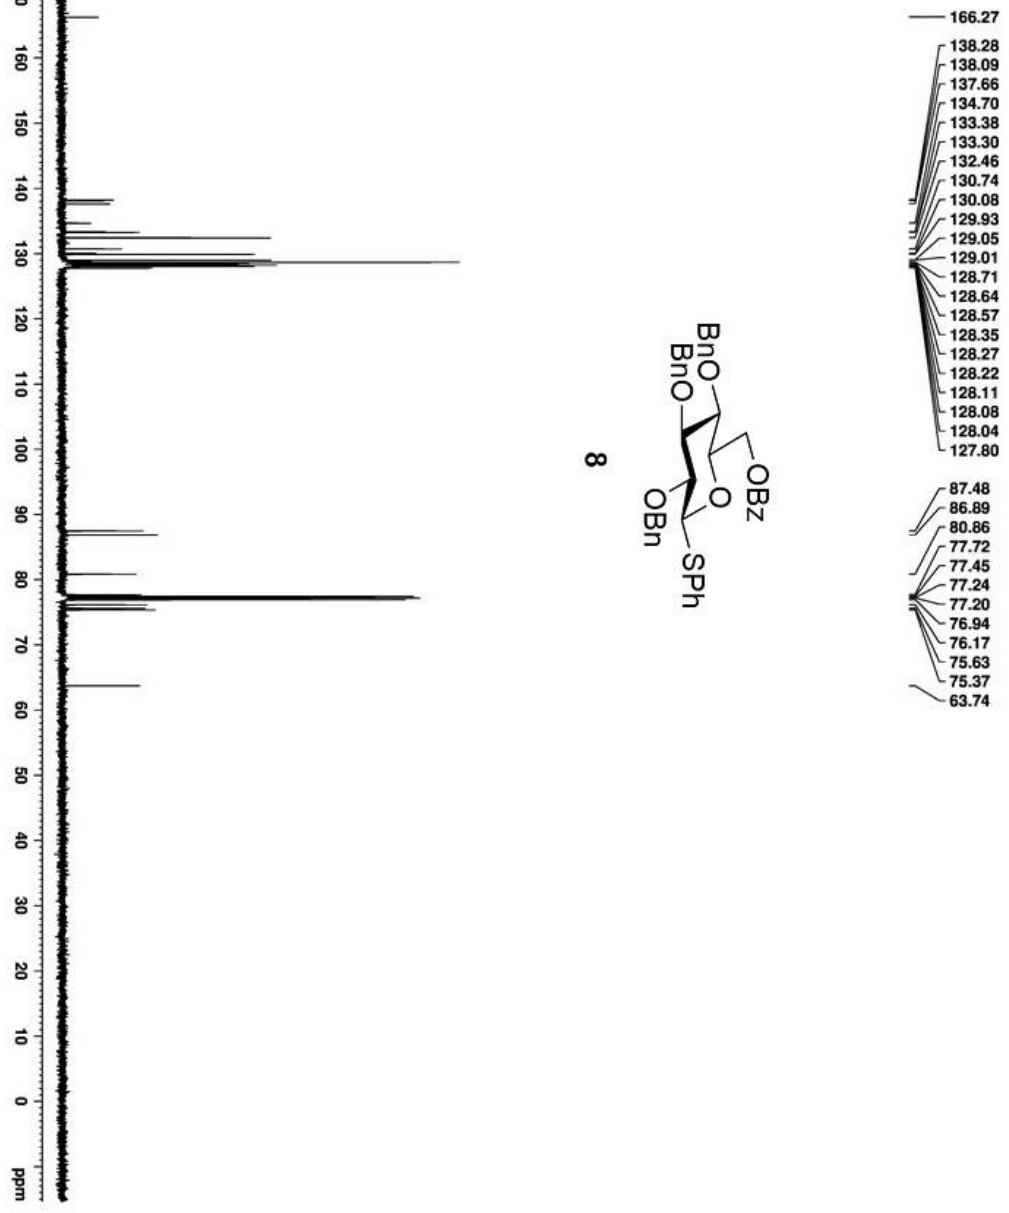

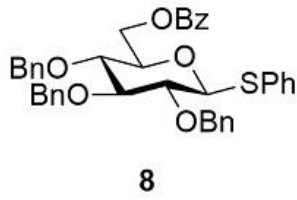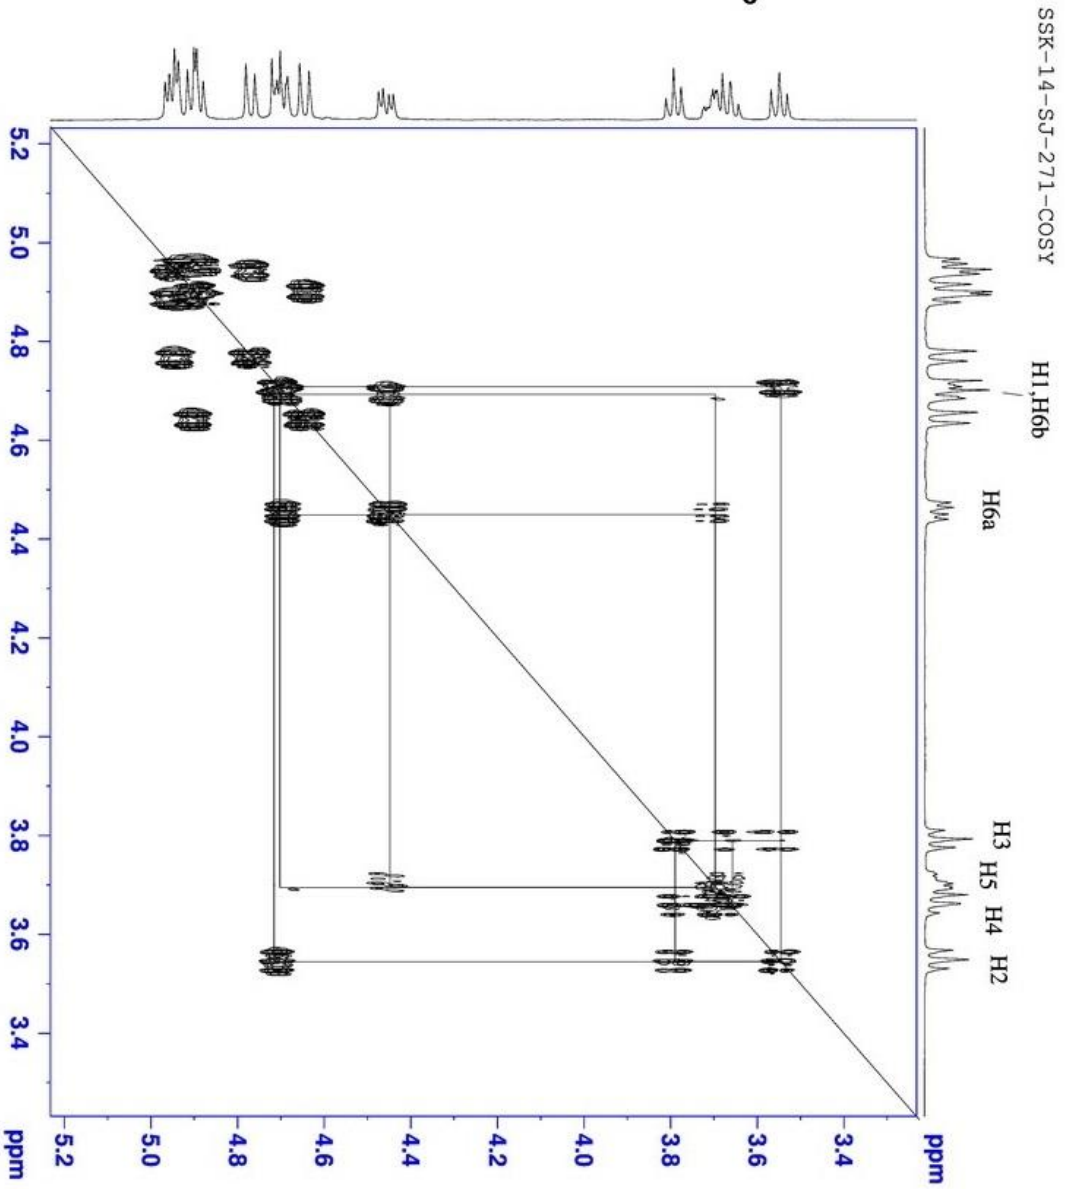

Current Data Parameters  
 NAME SSK-14-SJ-271-COSY  
 EXNO 9  
 PROCNO 1

F2 - Acquisition Parameters  
 Date\_ 20160115  
 Time 17.39  
 INSTRUM spect  
 PROBD 5 mm PABBO BR/  
 PULPROG cosypppd  
 TD 65536  
 SOLVENT CDCl3  
 NS 8  
 DS 0  
 SWH 1000.400 Hz  
 FIDRES 0.188404 Hz  
 AQ 1.345674 sec  
 RG 134.65  
 DE 499.800 usec  
 TE 296.4 K  
 D0 0.00000000 sec  
 D1 0.00000000 sec  
 D11 0.03000000 sec  
 D12 0.00002000 sec  
 D13 0.00000400 sec  
 D16 0.00020000 sec  
 INO 0.00099960 sec

===== CHANNEL f1 =====  
 SFO1 500.1321279 MHz  
 NUC1 1H  
 P0 13.00 usec  
 P1 13.00 usec  
 P17 2500.00 usec  
 PL1 13.920100 usec  
 PL10 3.25000000 M

===== GRADIENT CHANNEL =====  
 GPRM[1] SMSQ10.100  
 GPZ1 10.00 %  
 F16 1000.00 usec

F1 - Acquisition parameters  
 SI 51  
 SFO1 500.1321 MHz  
 FIDRES 19.615690 Hz  
 SW 2.000 ppm  
 FMODE QF

F2 - Processing parameters  
 SI 1024  
 SF 500.1300113 MHz  
 MDW 0  
 LSF 0 Hz  
 GB 0  
 PC 1.40

F1 - Processing parameters  
 SI 65536  
 SF 500.1300113 MHz  
 MDW 0  
 SSB 0 Hz  
 LB 0  
 GB 0

SSK-14-SJ-280-1H

SSK-14-SJ-280-1H

NAME SSK-14-SJ-280-1H  
EXPNO 1  
PROCNO 1  
Date\_ 20160203  
Time 10.02  
INSTRUM spect  
PROBHD 5 mm SET 1H/D-  
PULPROG zg30  
TD 54274  
FIDRES 0.151522 Hz  
AQ 3.2999091 sec  
RG 32  
DW 60.800 usec  
DE 6.50 usec  
TE 294.9 K  
D1 1.00000000 sec  
TD0 1

===== CHANNEL f1 =====  
NUC1 1H  
P1 14.75 usec  
PL1 -1.00 dB  
PL1W 10.56206695 W  
SFO1 400.1324710 MHz  
SI 32768  
SF 400.1300106 MHz  
MCM EM  
SSB 0  
LB 0.30 Hz  
GB 0  
PC 1.00

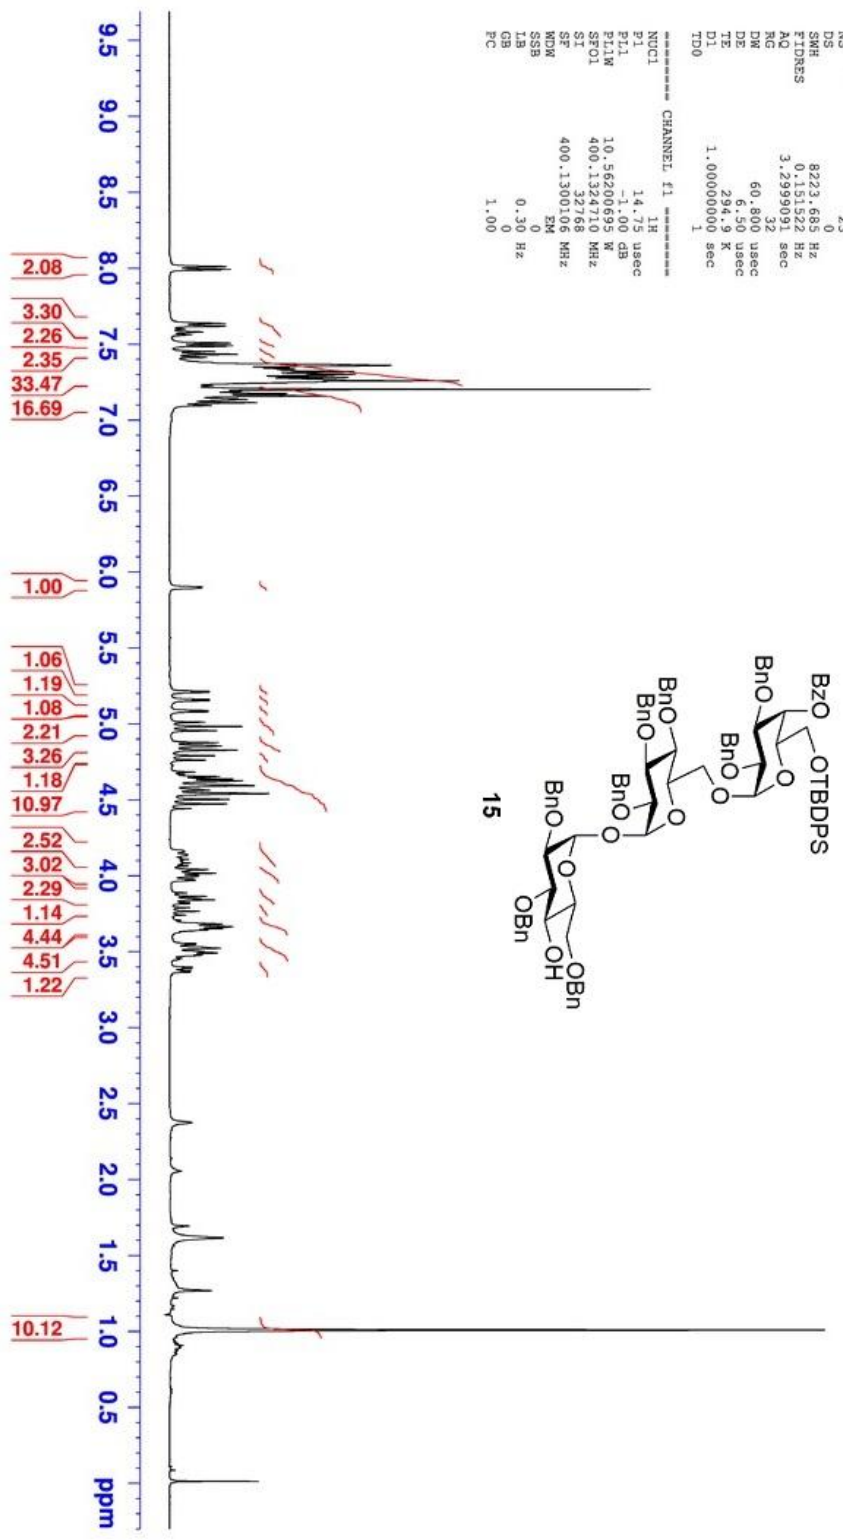

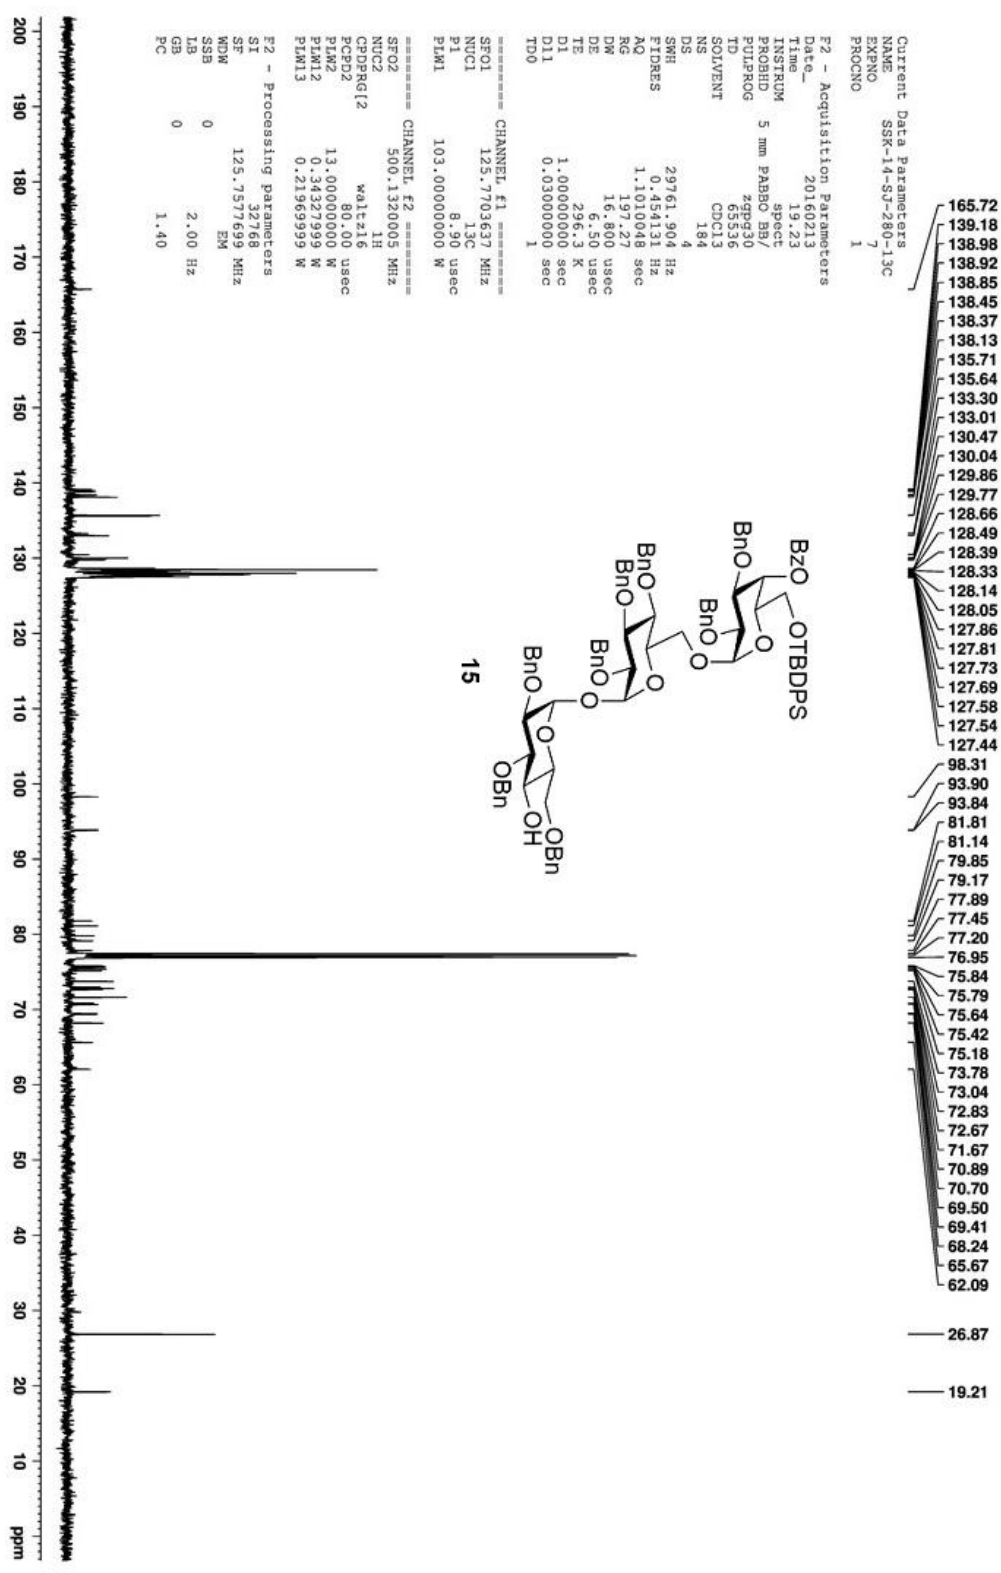

SSK-14-sj-281-1H

SSK-14-sj-281-1H

NAME SSK-14-sj-281-1H  
EXPNO 5  
PROCNO 1  
Date\_ 20160203  
Time 23.40  
INSTRUM 5 mm SEI 1H/D-  
PROBHD spect  
PULPROG zg30  
TD 54274  
SOLVENT CDCl3  
NS 25  
DS 0  
SWH 8223.685 Hz  
FIDRES 0.151522 Hz  
AQ 3.2999091 sec  
RG 90.5  
DM 60.800 usec  
DE 6.50 usec  
TE 295.4 K  
D1 1.00000000 sec  
TD0 1

===== CHANNEL f1 =====  
NUC1 1H  
P1 6.75 usec  
PL1 -3.00 dB  
PL1W 16.73965454 W  
SFO1 400.1324710 MHz  
SI 32768  
SF 400.1300156 MHz  
WDW EM  
SSB 0  
LB 0.30 Hz  
GB 0  
PC 1.00

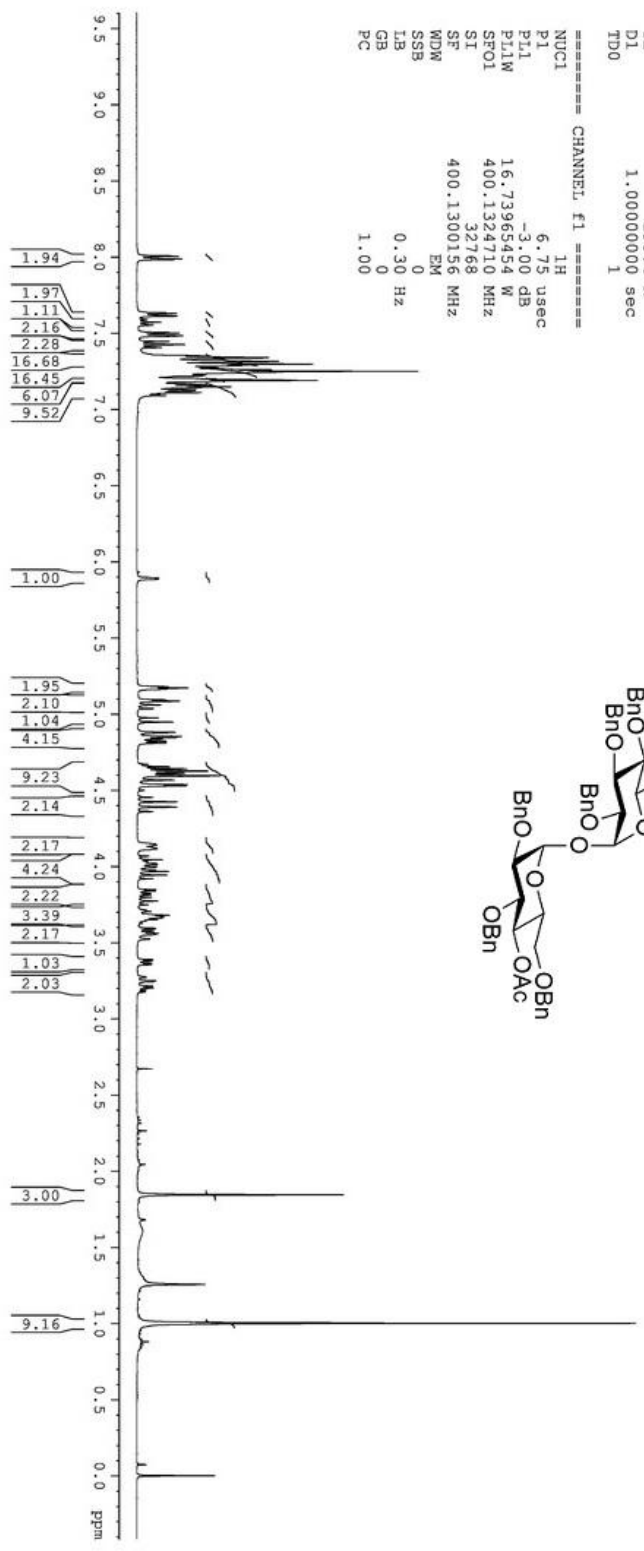

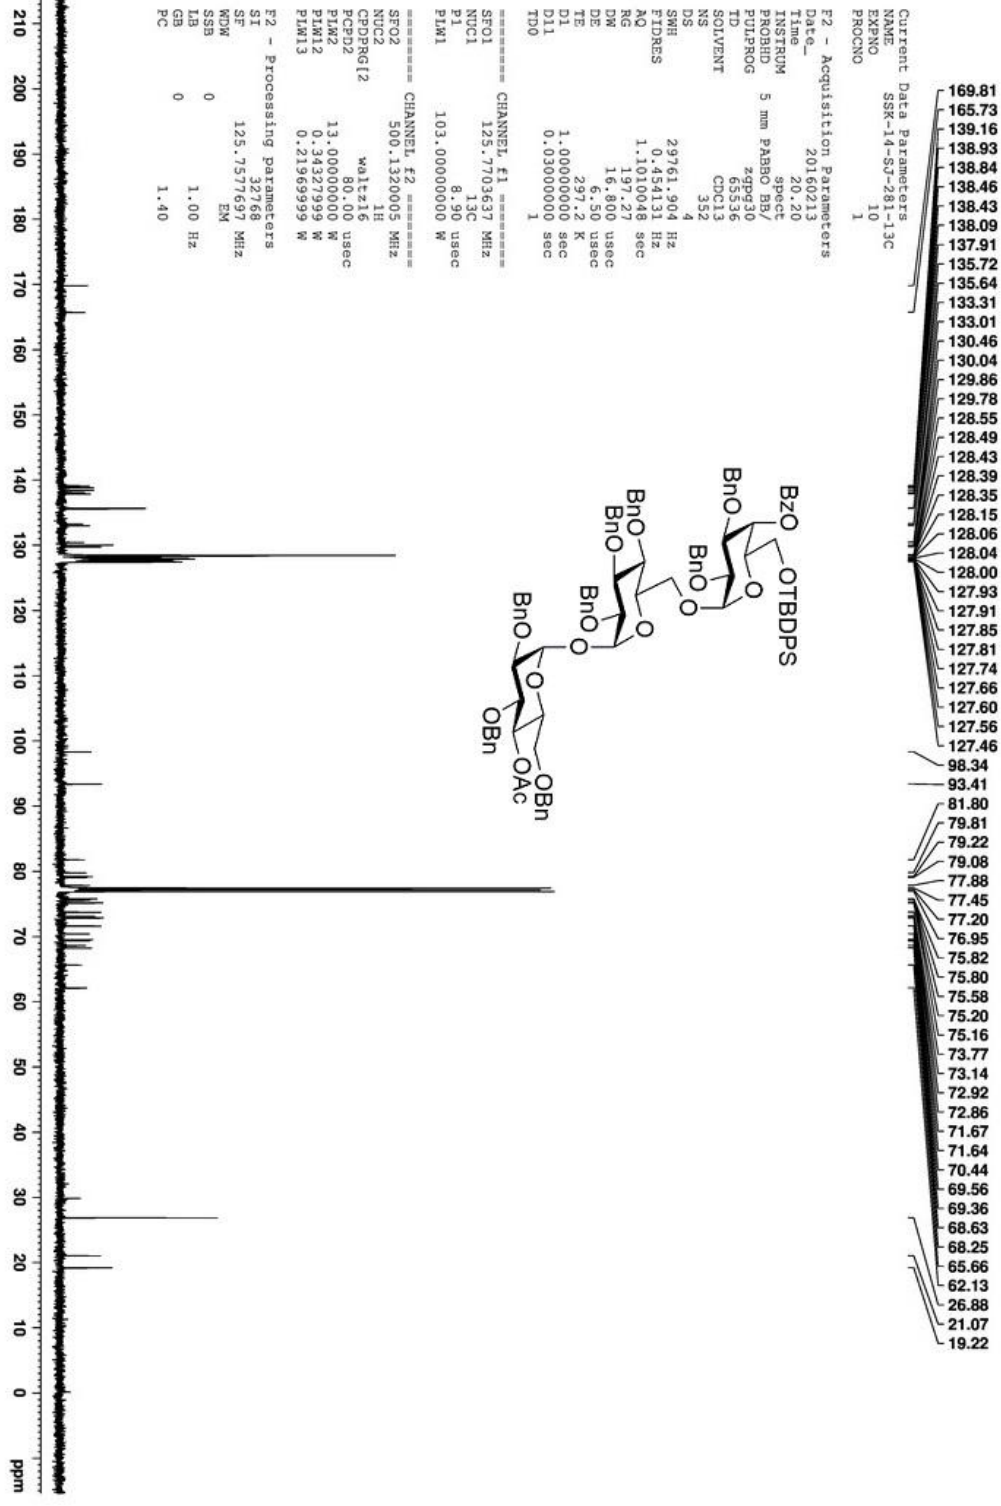



SSK-14-SJ-281A-COSY

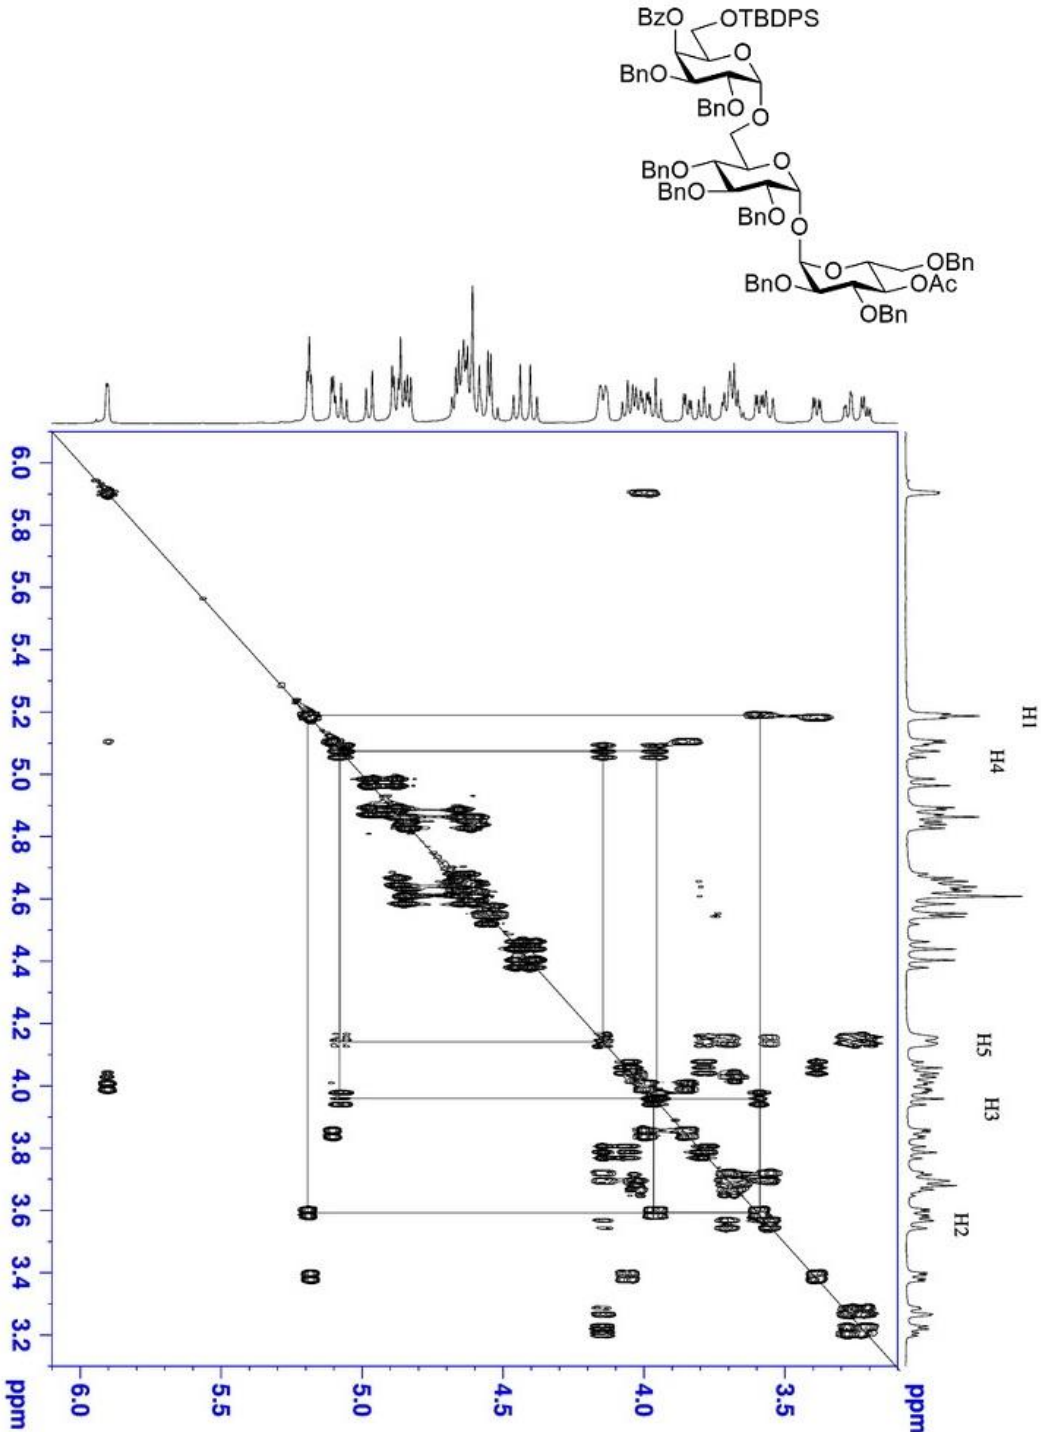

Current Data Parameters  
 NAME SSK-14-SJ-281A-COSY  
 EXNO 5  
 PROCNO 1

F2 - Acquisition Parameters  
 DATE\_ 20160203  
 TIME 11:40  
 INSTRUM spect  
 PROBD 5 mm PABBO BB/  
 PULPROG cosypppgf4  
 TD 2048  
 SOLVENT CDCl3  
 DS 1  
 SFO 1731.302 Hz  
 FIDRES 0.845362 Hz  
 AQ 0.5914624 sec  
 RG 119.07  
 NG 289.450  
 DM 4.50 usec  
 TE 297.3 K  
 D0 0.00000300 sec  
 D1 1.00000000 sec  
 D11 0.03000000 sec  
 D12 0.00020000 sec  
 D13 0.00000000 sec  
 D16 0.00020000 sec  
 INO 0.00057760 sec

===== CHANNEL f1 =====  
 SR01 500.1322978 MHz  
 P0 13.00 usec  
 P1 13.00 usec  
 P17 2500.00 usec  
 PLW1 13.00000000 W  
 PLM10 3.25000000 W

===== CHANNEL f2 =====  
 GRNAM(f1) SMSQLO.100  
 CP21 10.00 %  
 P16 1000.00 usec

F1 - Acquisition parameters  
 TD 500.1323 MHz  
 SR01 500.1323 MHz  
 FIDRES 13.525796 Hz  
 SW 3.462 ppm  
 FNUCDE QF

F2 - Processing parameters  
 SI 1024  
 SF 500.1300125 MHz  
 MDW 0 Hz  
 SSB 0 Hz  
 LB 0 Hz  
 GB 1.40

F1 - Processing parameters  
 SI 1024  
 MC2 QF  
 SF 500.1300125 MHz  
 SSB QSI NS  
 LB 0 Hz  
 GB 0

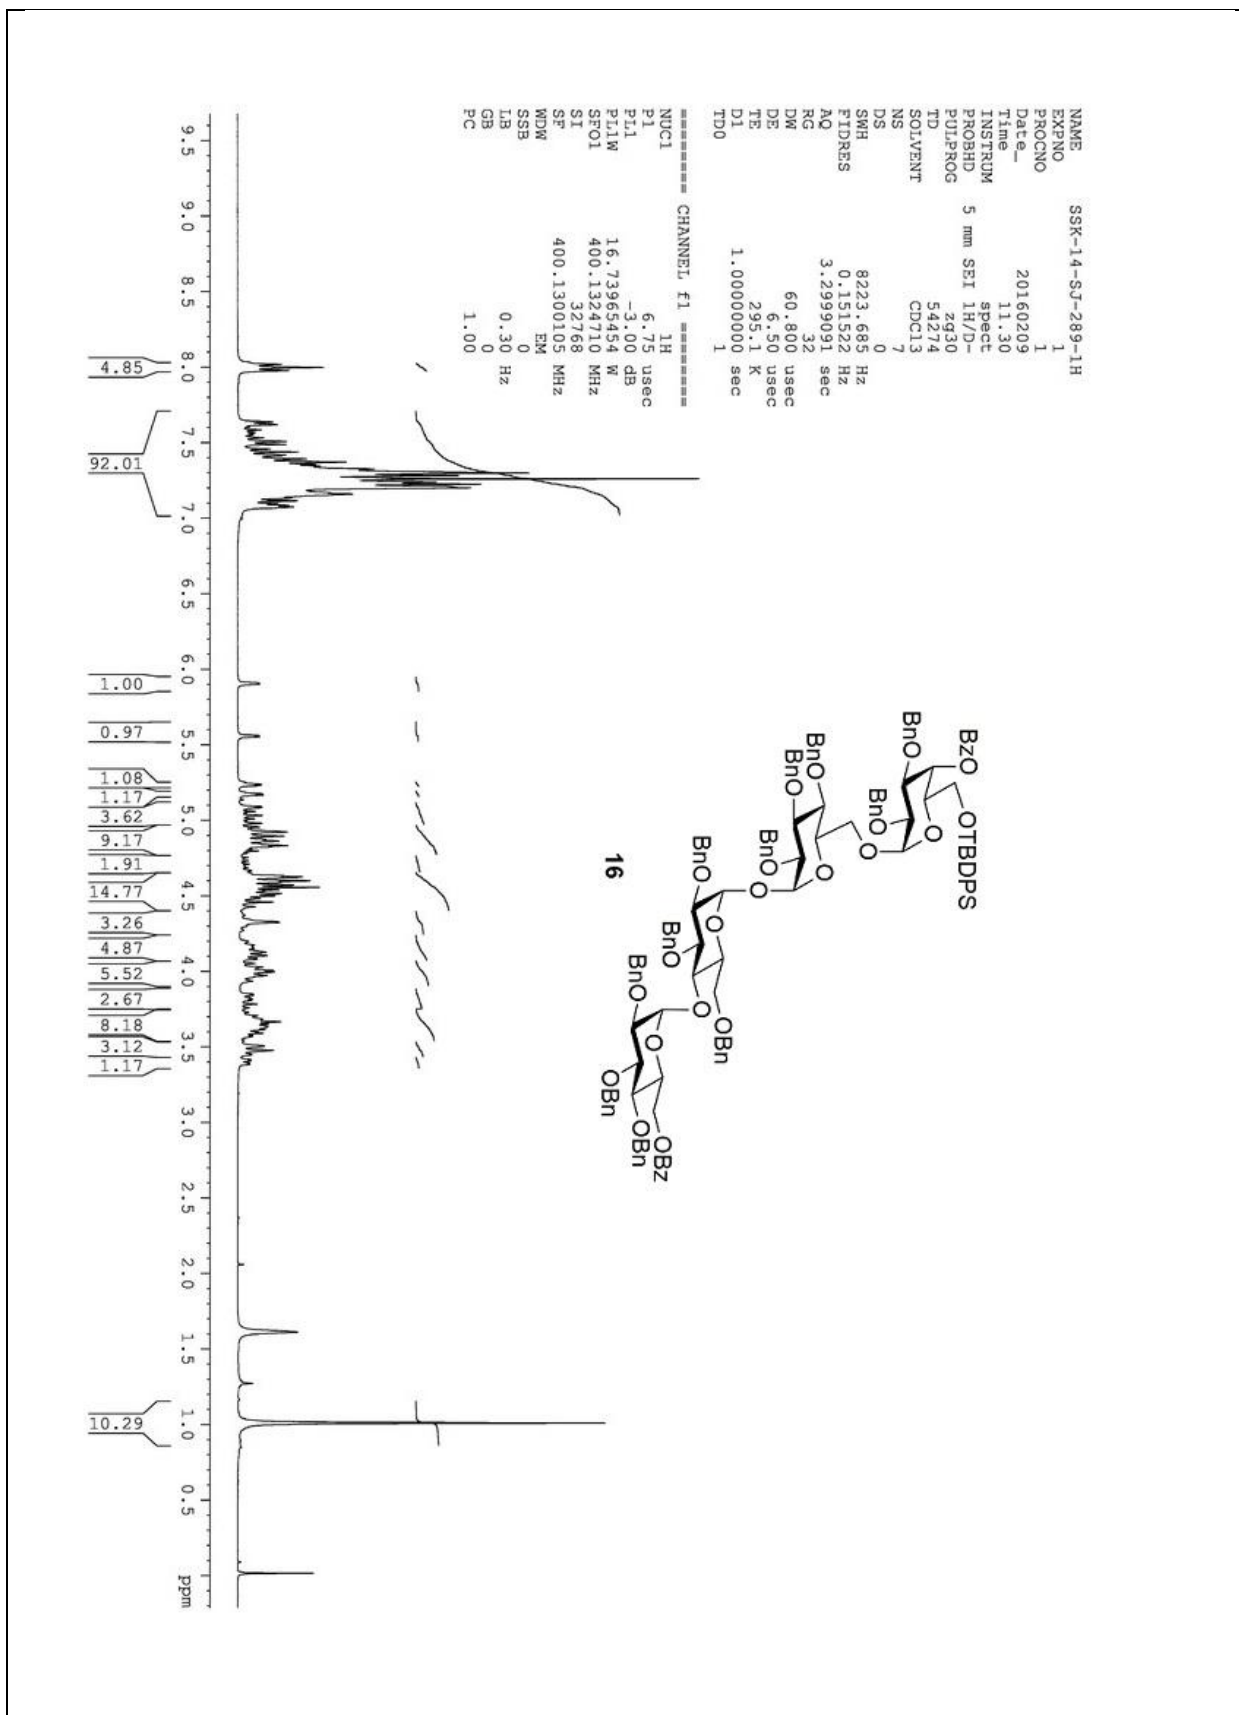

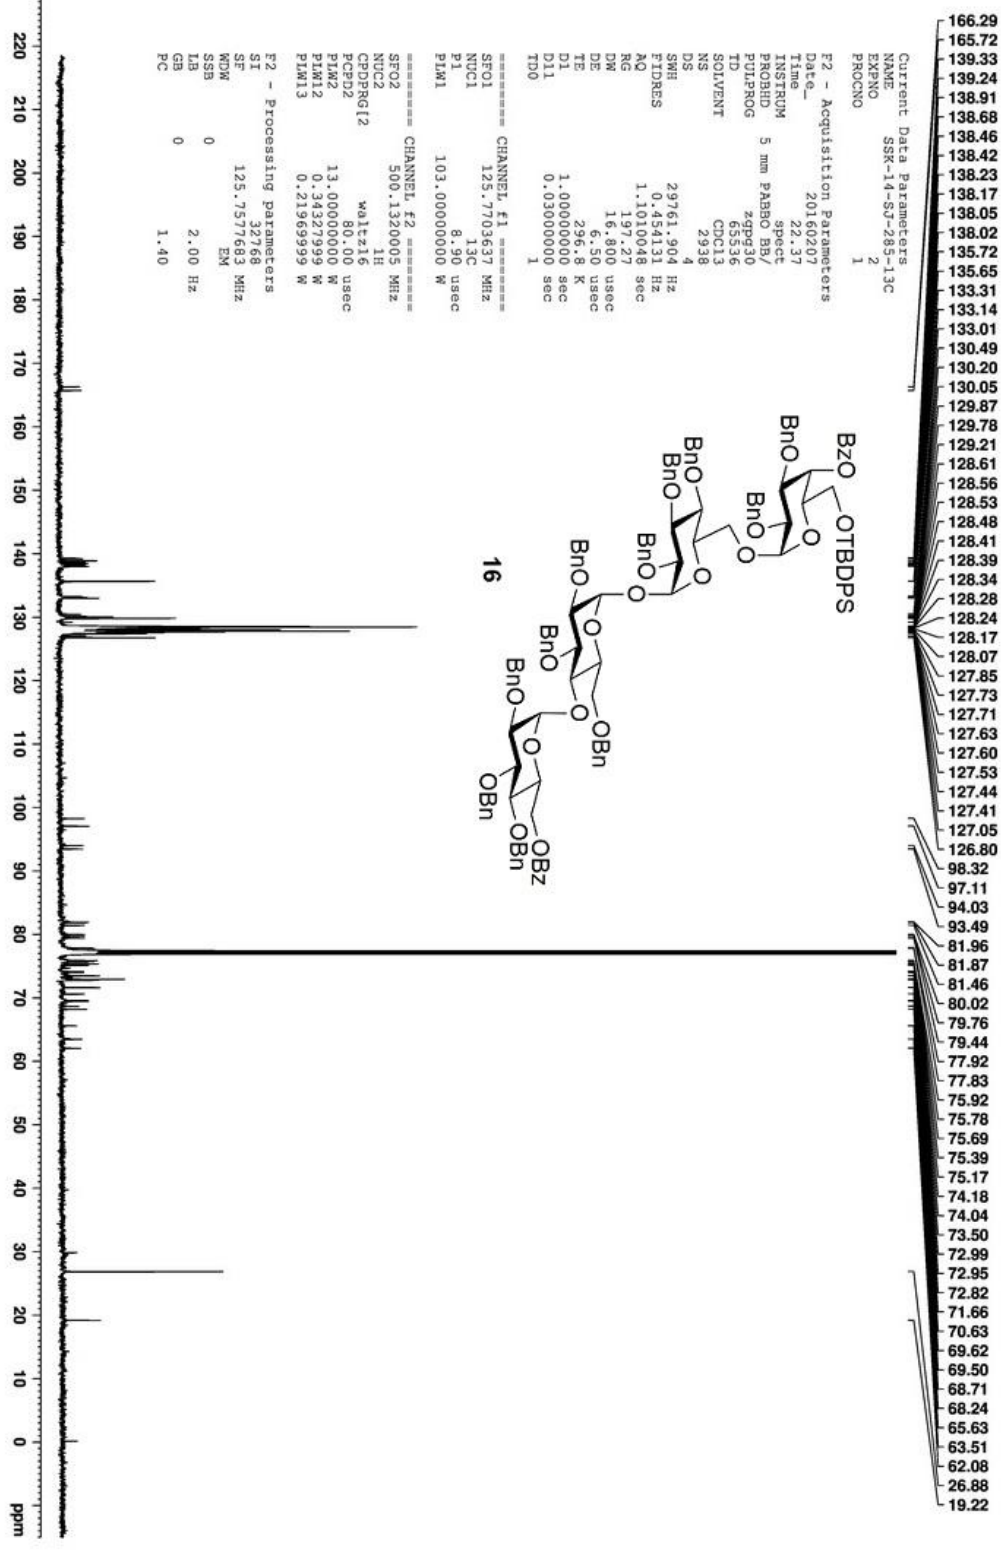

SSK-14-SJ-285-COSY

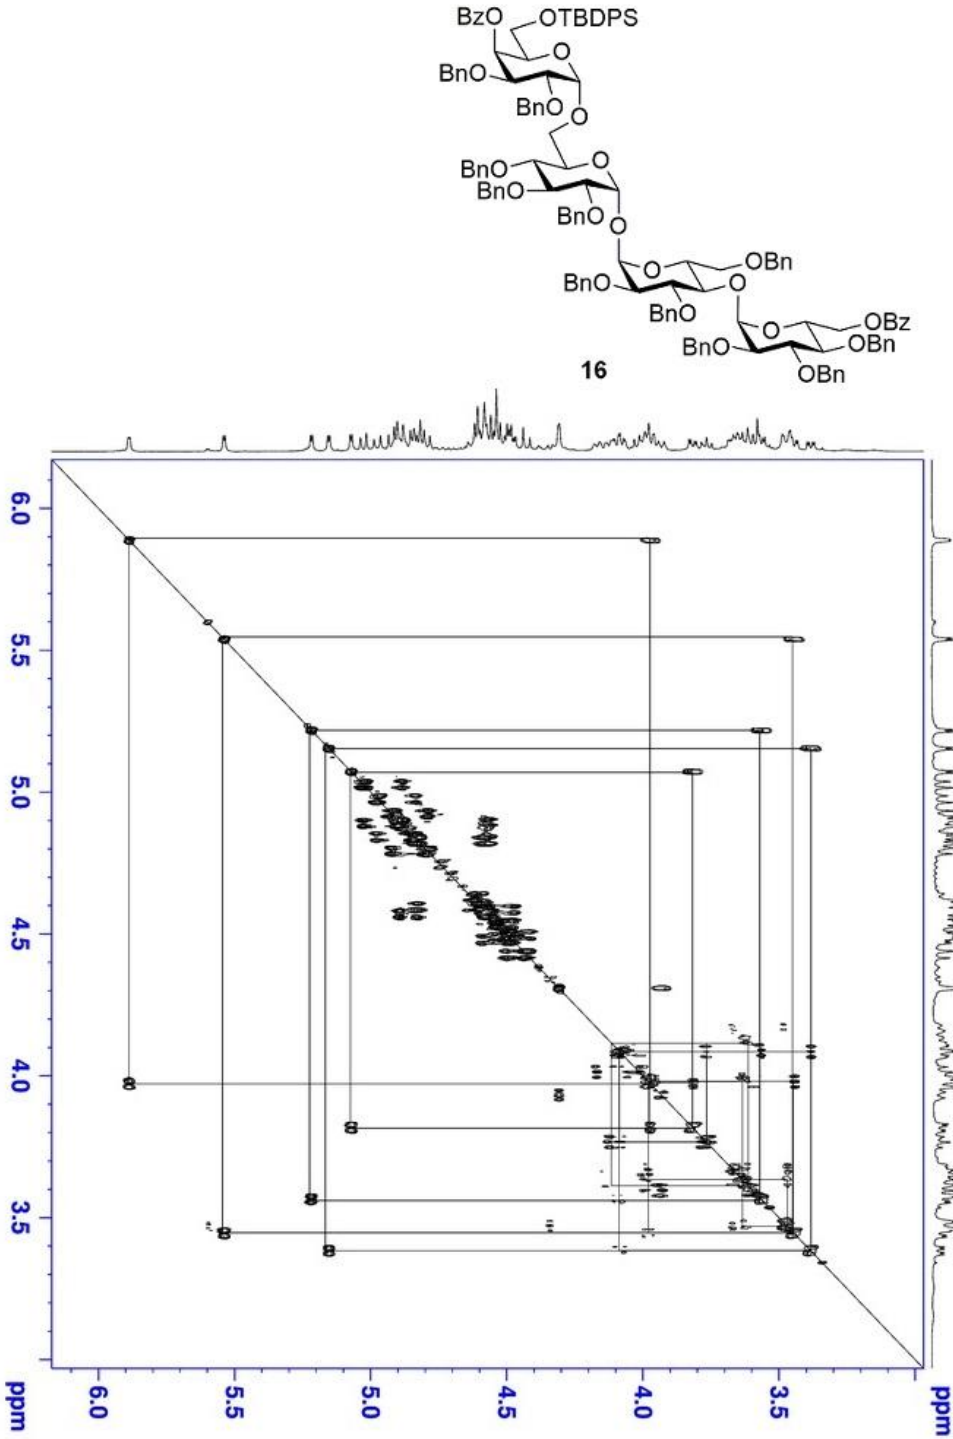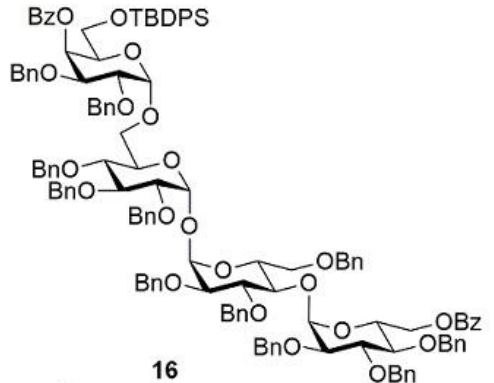

```

Current Data Parameters
NAME          SSK-14-SJ-285-COSY
EXPNO        9
PROCNO       1
-----
F2 - Acquisition Parameters
Date_         20160207
Time          20:44
INSTRUM      5 mm PABBO BB/
PROBHD       cosypppbb
PULPROG      zgpg30
SOLVENT      CDCl3
NS           16
DS           2
SWH          1601.537 Hz
FIDRES      0.782001 Hz
AQ          0.639549 sec
RG          312.200 usec
DE          6.50 usec
TE          296.1 K
D0          0.0000200 sec
D1          1.0000000 sec
D11         0.0000000 sec
D12         0.0002000 sec
D13         0.0000400 sec
D16         0.0002000 sec
IN0         0.00062440 sec
-----
CHANNEL f1
NUC1         13C
P0           13.00 usec
P1           13.00 usec
P17         2500.00 usec
PULPRG      zgpg30
PC          3.25000000 M
EVM10
-----
GRABM [1]
GRZ1        10.00 %
GRZ2        1000.00 usec
P16
-----
F1 - Acquisition parameters
TD          128
SFO1       500.1323 MHz
FIDRES     12.512012 Hz
SFO2       3.202 ppm
ENHMODE    QF
-----
F2 - Processing parameters
SI          1024
SF         500.1300182 MHz
WDW         Q3SINE
SSB         0 Hz
GB          0
PC          1.40
-----
F1 - Processing parameters
SI          1024
SF         500.1300182 MHz
WDW         Q3SINE
SSB         0 Hz
GB          0
PC          0

```



SSK-14-SJ-289-CH COUPLING

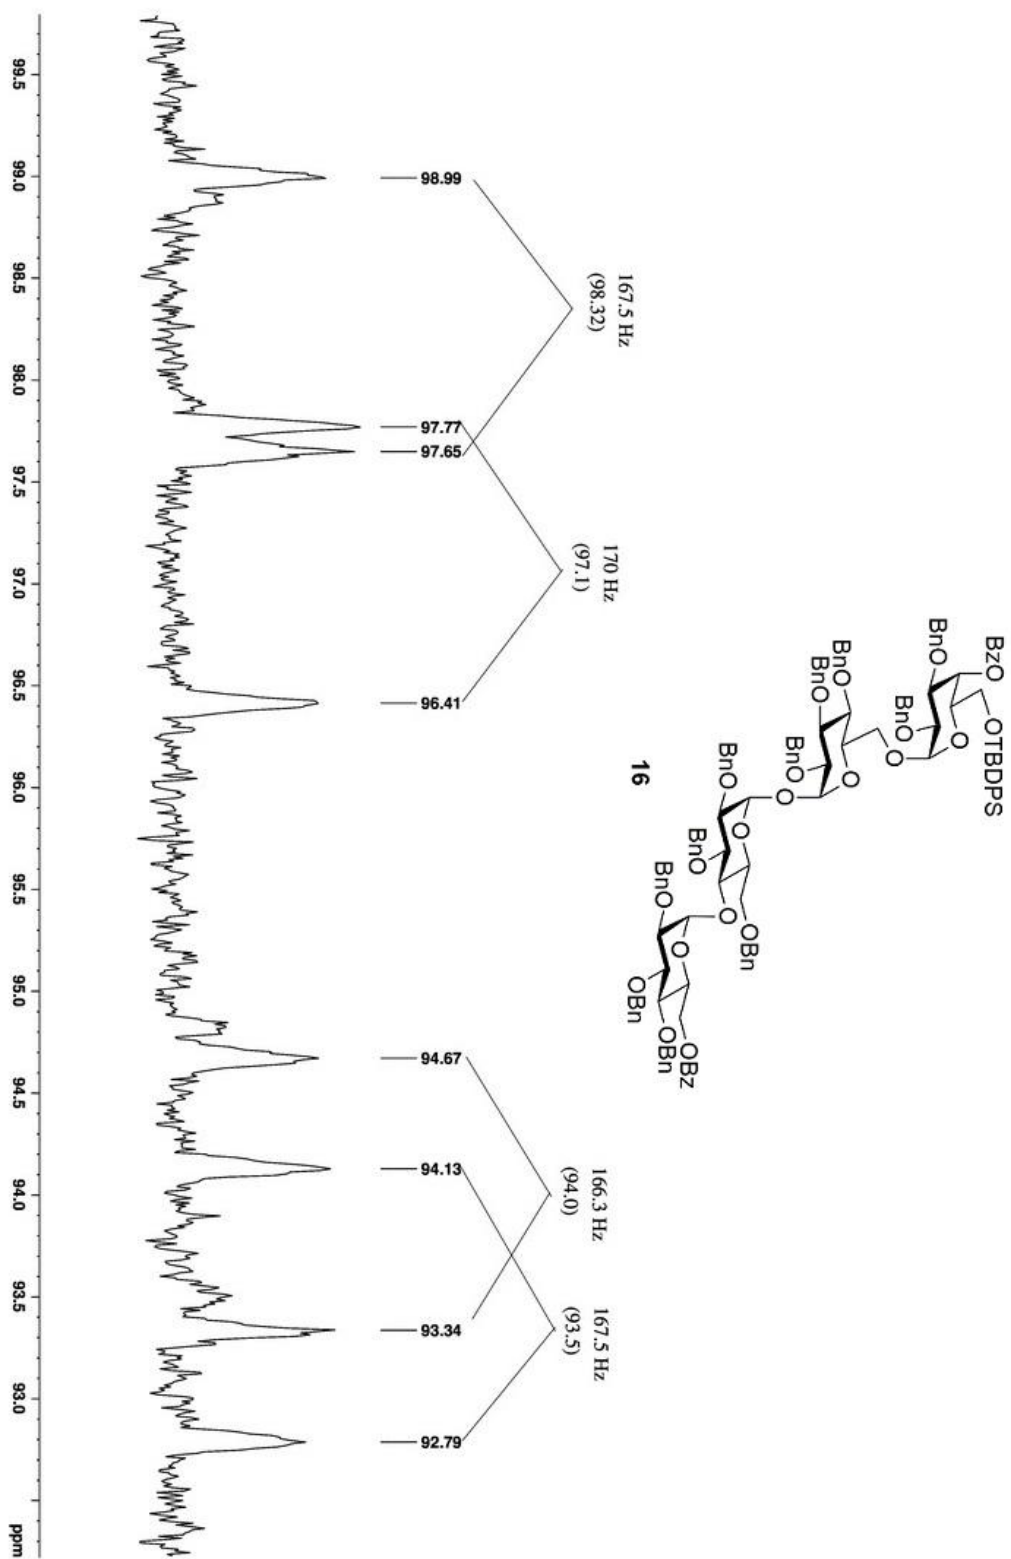

NAME SSK-14-SJ-290-1H  
 EXPNO 3  
 PROCNO 1  
 Date\_ 20160210  
 Time 22.53  
 INSTRUM spect  
 PROBHID 5 mm SEI 1H/D-  
 PULPROG zg30  
 TD 54274  
 SOLVENT CDCl3  
 NS 13  
 DS 0  
 SMH 8223.685 Hz  
 FIDRES 0.151522 Hz  
 AQ 3.2999091 sec  
 RG 64  
 DW 60.800 usec  
 DE 6.50 usec  
 TE 295.2 K  
 D1 2.00000000 sec  
 TD0 1

===== CHANNEL f1 =====  
 NUCL1 1H  
 P1 14.75 usec  
 PL1 -1.00 db  
 PL1W 10.56200695 W  
 SFO1 400.1324710 MHz  
 SI 32768  
 SF 400.1300139 MHz  
 WDW EM  
 SSB 0  
 GB 0.30 Hz  
 LB 0  
 PC 1.00

SSK-14-SJ-290-1H

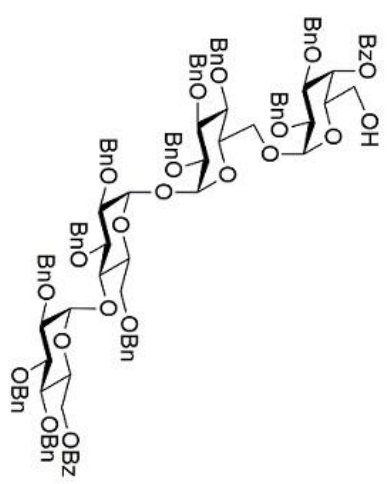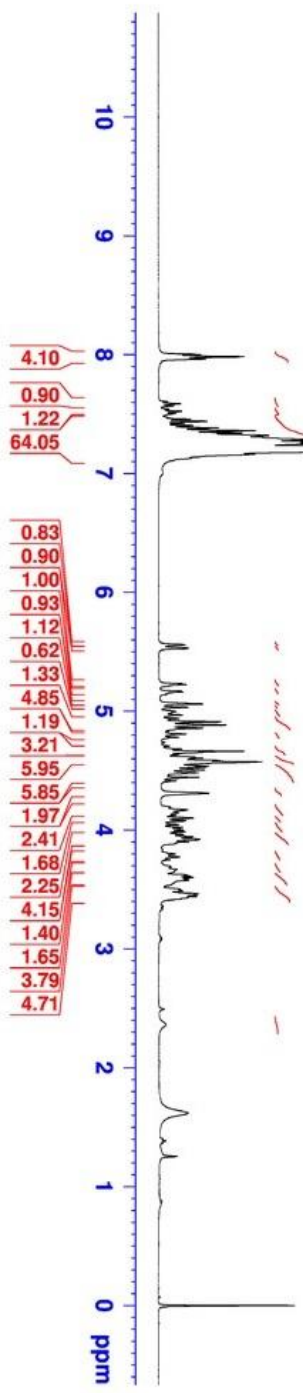

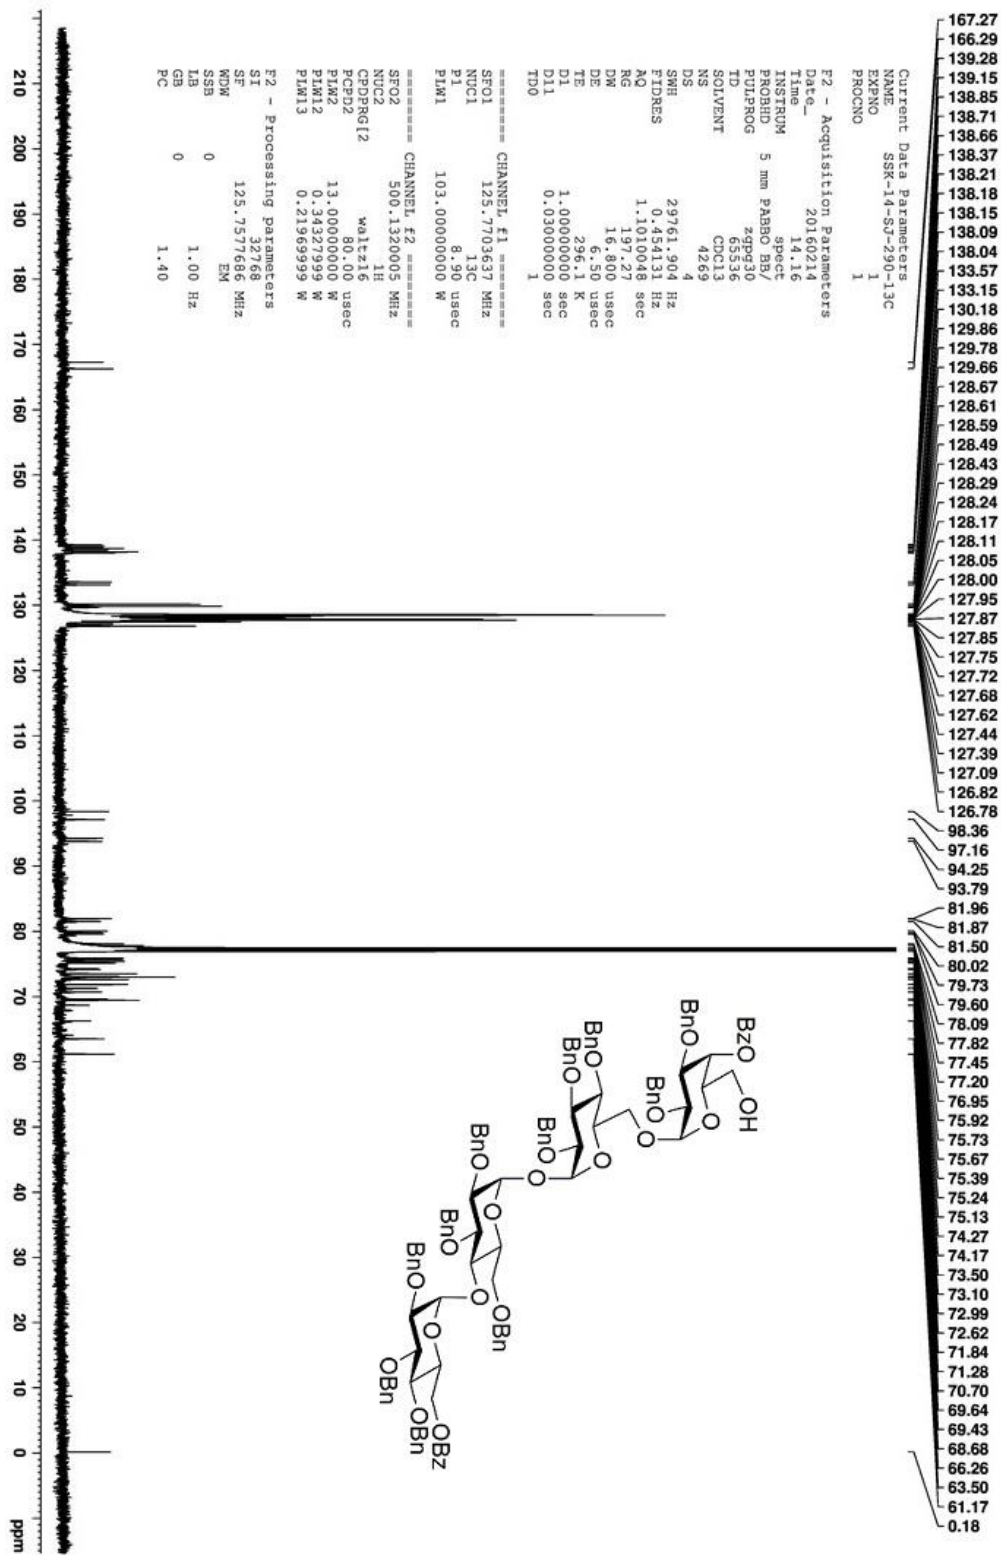



SSK-14-SJ-294B-1H

Current Data Parameters  
 NAME SSK-14-SJ-294B-1H  
 EXPNO 1  
 PROCNO 1

F2 - Acquisition Parameters  
 Date\_ 20160216  
 Time 20.15  
 INSTRUM spect  
 PROBRD 5 mm PABBO BB/  
 PULPROG zg30  
 TD 65536  
 SOLVENT MeOD  
 NS 50  
 DS 2  
 SWH 10000.000 Hz  
 FIDRES 0.152588 Hz  
 AQ 3.2767999 sec  
 RG 30.72  
 DW 50.000 usec  
 DE 6.50 usec  
 TE 296.1 K  
 D1 1.00000000 sec  
 ID0 1

CHANNEL #1  
 SFO1 500.1330885 MHz  
 NUC1 1H  
 P1 13.00 usec  
 PL1 13.00000000 W  
 FLM1

F2 - Processing parameters  
 SI 4536  
 SF 500.129924 MHz  
 NDW 0  
 SSB 0  
 LB 0  
 GB 0  
 PC 1.00

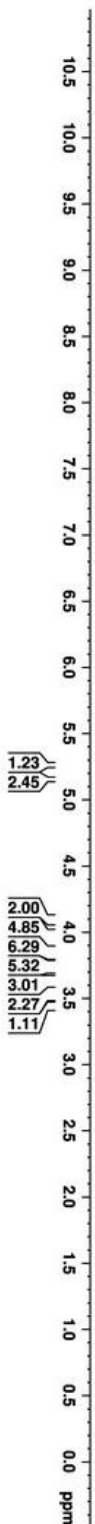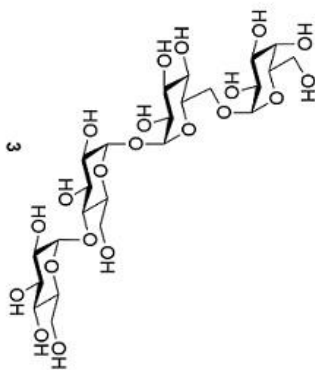

Current Data Parameters  
 NAME SRK-14-SI-294-BI-13C  
 EXPNO 12  
 PROCNO 1

F2 - Acquisition Parameters  
 Date\_ 20160216  
 Time 23.40  
 INSTRUM spect  
 PROBHD 5 mm PABBO BB/  
 PULPROG zgpg30  
 TD 65536  
 SOLVENT MeOD  
 NS 652  
 DS 4  
 SWH 29761.904 Hz  
 FIDRES 0.454131 Hz  
 AQ 1.1010048 sec  
 RG 197.27  
 DW 16.800 usec  
 DE 8.30 usec  
 TE 296.8 K  
 D1 1.0000000 sec  
 D11 0.0300000 sec  
 TD0 1

CHANNEL f1  
 SF01 125.7703637 MHz  
 NU01 13C  
 P1 8.90 usec  
 P1M1 103.00000000 W

CHANNEL f2  
 SF02 500.1320005 MHz  
 NU02 1H  
 CPDPRG12 waltz16  
 PCPD2 80.00 usec  
 P1M2 13.00000000 W  
 P1M12 0.34327999 W  
 P1M13 0.21969999 W

F2 - Processing parameters  
 SI 32768  
 SF 125.7577890 MHz  
 WDW EM  
 SSB 0 Hz  
 LB 0 Hz  
 GB 0  
 PC 1.40

- 100.56
- 98.17
- 93.64
- 93.55
- 78.62
- 73.37
- 73.03
- 72.33
- 71.42
- 71.12
- 70.97
- 70.75
- 70.12
- 69.88
- 69.73
- 69.43
- 68.74
- 65.65
- 61.12
- 60.90
- 60.58

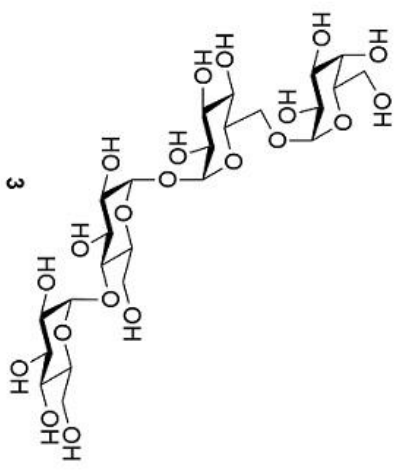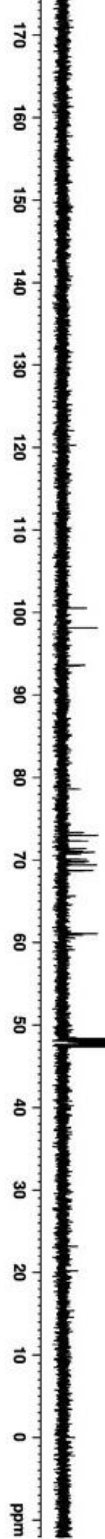

Supplement: c6ob00412a1.pdf [file c6ob00412a1.pdf]
